# Supplementary material for: Synthesis of skeletally diverse β-lactam haptens for the in vitro diagnosis of IgE-mediated drug allergy
Source: Royal Society of Chemistry journal article supplement (doi:10.1039/d2cc01677j), 2022-01-01
Supplement: d2cc01677j1.pdf [file d2cc01677j1.pdf]

## Supporting Information

### Synthesis of skeletally diverse $\beta$ -lactam haptens for the in vitro diagnosis of IgE-mediated drug allergy

Edurne Peña-Mendizabal<sup>a</sup>, Bruce K. Hua<sup>\*b,c</sup>, Ethel Ibañez-Echevarria<sup>d</sup>, Dolores Hernández-Fernández de Rojas<sup>e</sup>, Ángel Maquieira<sup>a,f,g</sup>, Stuart L. Schreiber<sup>b,c</sup>, and Sergi Morais<sup>\*a,f,g</sup>

<sup>a</sup>IDM, Universitat Politècnica de València- Universitat de València, Camino de vera s/n, 46022 Valencia, Spain.  
E-mail: [smorais@upv.es](mailto:smorais@upv.es)

<sup>b</sup>Department of Chemistry and Chemical Biology, Harvard University, Cambridge, Massachusetts, 02138, United States

<sup>c</sup>Chemical Biology and Therapeutics Science Program, Broad Institute, Cambridge, Massachusetts, 02142, United States

<sup>d</sup>Hospital Universitari i Politènic La Fe, Servicio de Alergia, Avinguda de Fernando Abril Martorell, 106, 46026 València, Spain

<sup>e</sup>Allergy Therapeutics Ibérica, Avda Barcelona, 115, Edificio Brasol, 2<sup>a</sup> planta, 08970 Sant Joan Despí, Barcelona, Spain

<sup>f</sup>Departamento de Química, Universitat Politècnica de València, Camino de Vera s/n, 46022, Valencia, Spain

<sup>g</sup>Unidad Mixta UPV-La Fe, Nanomedicine and Sensors, IIS La Fe, Valencia, Spain.

### Content

#### Experimental section

|                                                                                                                                                                                                                                                                                     |    |
|-------------------------------------------------------------------------------------------------------------------------------------------------------------------------------------------------------------------------------------------------------------------------------------|----|
| 1. General methods .....                                                                                                                                                                                                                                                            | 2  |
| 2. Experimental procedures .....                                                                                                                                                                                                                                                    | 3  |
| Table S1. Optimization conditions for the Petasis reaction .....                                                                                                                                                                                                                    | 59 |
| 3. Biological methods .....                                                                                                                                                                                                                                                         | 60 |
| Antigen preparation .....                                                                                                                                                                                                                                                           | 60 |
| Protein Digestion and LC-ESI-MS/MS Analysis .....                                                                                                                                                                                                                                   | 60 |
| Multiplexed Compact disc-based test protocol .....                                                                                                                                                                                                                                  | 61 |
| Figure S1. A) Histogram of the ‘activity’ of the antigens. B) Heatmaps for the cohort of the HSA- and H1-derived antigens representing the signals obtained in the immunoassays for each immunised sera (S1 and S2). 1) 6-APA, 2) 7-ACDA, 3) AMX, and 4) AMP-derived antigens. .... | 62 |
| Figure S2. The amino acid sequence was obtained for HSA after protein modification with antigen 1c .....                                                                                                                                                                            | 63 |
| .....                                                                                                                                                                                                                                                                               | 63 |
| Figure S3. Modified peptide and ESI-MS/MS spectra fragmentation pathway of (K) VFDEFKPLVEEPQNLIK(Q) .....                                                                                                                                                                           | 64 |
| Figure S4. Calibration curve for IgE using IgE human serum (3 <sup>rd</sup> WHO International Standard) and the capture antibody Omalizumab. ....                                                                                                                                   | 65 |
| 4. Samples from allergic patients and controls .....                                                                                                                                                                                                                                | 66 |
| Table S2. Clinical characteristics of the cohort of allergic patients .....                                                                                                                                                                                                         | 66 |

## Experimental section

## 1. General methods

Oxygen- and moisture-sensitive reactions were carried out in flame-dried glassware under a nitrogen atmosphere. According to cited procedures, all reagents and solvents were purchased and used as received from commercial vendors or synthesized.

All yields refer to chromatographically and spectroscopically pure compounds unless otherwise stated. Reaction progress was monitored by analytical thin-layer chromatography (TLC) and  $^1\text{H}$ -NMR spectroscopy. TLC analyses were performed using E. Merck silica gel 60 F254 pre-coated plates (250  $\mu\text{m}$ ). A handheld 254 nm UV lamp and potassium permanganate staining solution (with light heating) were used for detection. Flash column chromatography was performed using a Teledyne ISCO CombiFlash Rf+ purification system with RediSep Rf Gold Normal-Phase Silica columns.

Known compounds were characterized by, at minimum,  $^1\text{H}$  NMR spectroscopy. Novel synthetic intermediates and final compounds were characterized by, at minimum,  $^1\text{H}$ -NMR,  $^{13}\text{C}$ -NMR spectroscopy, and HRMS. Further NMR experiments were performed as needed to confirm the structural assignment.

NMR spectra were recorded on Bruker UltraShield 300 MHz and Ascend 400 MHz spectrometers.  $^1\text{H}$  and  $^{13}\text{C}$ -NMR chemical shifts ( $\delta\text{H}$ ,  $\delta\text{C}$ ) are reported in parts per million (ppm) relative to the appropriate solvent— $\text{CDCl}_3$ : 7.26 ( $^1\text{H}$ ), 77.16 ( $^{13}\text{C}$ ) ppm.  $(\text{CD}_3)_2\text{SO}$ : 2.50 ( $^1\text{H}$ ), 39.52 ( $^{13}\text{C}$ ) ppm.  $\text{C}_6\text{D}_6$ : 7.16 ( $^1\text{H}$ ), 128.06 ( $^{13}\text{C}$ ) ppm. Resonances are described using the following abbreviations: s (singlet), d (doublet), t (triplet), q (quartet), quin. (quintet), m (multiplet), br (broad), dd (doublet of doublets), etc. Coupling constants (J) are given in Hz and are rounded to the nearest 0.1 Hz. All NMR data were collected at 25  $^\circ\text{C}$ . All deuterated solvents were purchased from Cambridge Isotope Laboratories.

Low-resolution mass spectra (LRMS) were acquired on a Waters 2795 separations module coupled to a 3100 mass detector operating in ESI+ mode.

## 2. Experimental procedures

(*E*)-2-Cyclopropylboronic acid (**3**) was purchased from Combi-Blocks and dried over 3Å molecular sieves.

### **General Procedure A:** Trimethylsilyldiazomethane methylation.

A flame-dried round-bottom flask was charged with a solution of corresponding BLC (Equiv.) in methanol (1 mL) and DCM (0.2 M) under an N<sub>2</sub> atmosphere. Then, (diazomethyl)trimethylsilane (2 M, one Equiv.) was added dropwise, and the reaction was allowed to stir at room temperature until the yellow solution turned clear. The solution was concentrated by rotary evaporation and purified by flash column chromatography (ISCO) to give the desired compound.

### **General Procedure B:** Petasis reaction.

A flame-dried round-bottom flask was charged with (4*R*,5*S*)-5-benzyl-2,2-dimethyl-4-hydroxy-1,3-dioxolane **2** (1 Equiv., 0.2 M) in the solvent system of 9:1 EtOH–hexafluoroisopropanol (*v/v*) and 3Å molecular sieves. To this stirred solution were added the corresponding BLC methyl ester **1a-1f** (1.5 Equiv) and (*E*)-2-cyclopropylvinylboronic acid **3** (1.5 equiv), successively. After stirring for 72 h at 40 °C, the resulting mixture was concentrated by rotary evaporation, and the residue was purified by flash column chromatography (ISCO) to give the desired compound.

### **General Procedure C:** N-alkylation of the Petasis product.

A solution of the Petasis product (1 Equiv., 0.2 M) and NaHCO<sub>3</sub> (10 Equiv.) in DMF was stirred for 30 min at 0 °C. Then, propargyl bromide (10 Equiv., 80% in toluene) was added under N<sub>2</sub>. After stirring for 24 h at 70 °C, the reaction mixture was cooled to room temperature and quenched with NH<sub>4</sub>Cl solution (50 mL). The resulting mixture was extracted with ether (3x50 mL), and combined organic layers were washed with brine and dried over MgSO<sub>4</sub>. The solution was concentrated by rotary evaporation, and the residue was purified by flash column chromatography (ISCO) to give the desired compound.

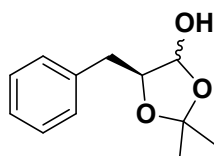

**(5S)-5-benzyl-2,2-dimethyl-1,3-dioxolan-4-ol (2)**

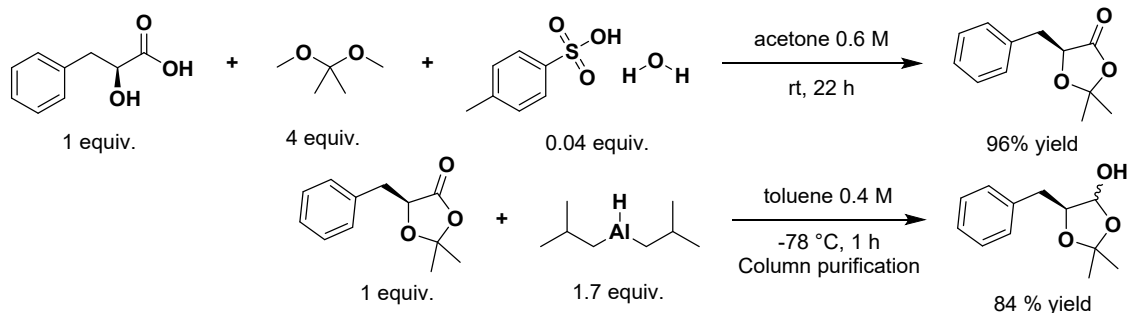

*Synth. Commun.* **1996**, *26*, 3453

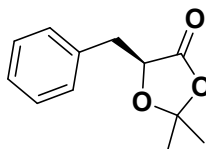

**1. (S)-5-Benzyl-2,2-dimethyl-4-oxo-1,3-dioxolane**

A flame-dried round-bottom flask was charged with a mixture of (S)-2-hydroxy-3-phenylpropanoic acid (10.00 g, 60.00 mmol) and p-TsOH.H<sub>2</sub>O (500 mg) in 2,2-dimethoxypropane (30 mL) and acetone (100 mL) and was stirred at room temperature for 22 h. After concentration by rotary evaporation, the resulting residue was dissolved in ethyl acetate (150 mL) washed with sat. NaHCO<sub>3</sub> (100 mL), brine (100 mL), dried (MgSO<sub>4</sub>), passed through a short pad of silica gel and concentrated to provide a white solid (11.70 g, 96% yield). <sup>1</sup>H-NMR (400 MHz, CDCl<sub>3</sub>) δ: 7.28 – 7.23 (m, 5H), 4.65 (dd, 1H), 3.12 (ABq, 2H), 1.49 (s, 3H), 1.35 (s, 3H). <sup>13</sup>C NMR (100 MHz, CDCl<sub>3</sub>) δ: 172.49, 135.79, 129.81, 128.38, 127.03, 110.84, 75.04, 37.65, 26.93, 26.16. Characterization data is consistent with those reported in the literature.

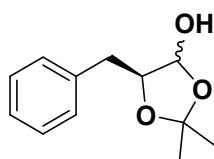

**2. (4R,5S)-5-Benzy1-2,2-dimethyl-4-hydroxy-1,3-dioxolane (2)**

To a stirred solution of (5S)-5-benzyl-2,2-dimethyl-1,3-dioxolan-4-one (1.83 g, 8.89 mmol) in toluene (37.5 mL) was added DIBAL-H (9.8 mL of a 1M solution in toluene, 9.78 mmol) at -78°C. The resulting solution was stirred at the same temperature for 60 min, and to this solution was added 1N HCl (9.8 mL) very slowly. After warming to room temperature, the solution was extracted with ethyl acetate (3 x 10 mL), filtered with MgSO<sub>4</sub>, and concentrated on providing a pale yellow oil **2** (1.53 g, 84% yield) after purification by flash chromatography (ISCO). <sup>1</sup>H-NMR (400 MHz, CDCl<sub>3</sub>) δ: 7.36 – 7.20 (m, 5H), 5.28 – 5.21 (m, 1H), 4.31 – 4.26 (m, 1H), 3.06 (d, *J* = 6.8 Hz, 1H), 2.94 (qd, *J* = 14.0, 6.6 Hz, 2H), 2.82 (br, 1H), 1.46 and 1.51 (two s, 6H, C(CH<sub>3</sub>)<sub>2</sub> for major isomer), 1.35 and 1.57 (two s, 6H, C(CH<sub>3</sub>)<sub>2</sub> for minor isomer); ratio of diastereomers was approximately 2: 1. Characterization data were consistent with those reported in the literature.



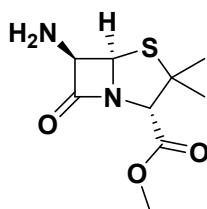

### 6-aminopenicillanic acid (6-APA) methyl ester (**1a**)

General procedure A was followed using 6-APA (2.00 g, 9.25 mmol), methanol (1 mL), and (diazomethyl)trimethylsilane (4.6 mL, 9.25 mmol) to give the desired compound **1a** as a viscous yellow oil (2.07 g, 97% yield). <sup>1</sup>H-NMR (400 MHz, CDCl<sub>3</sub>) δ: 5.51 (d, *J* = 4.3 Hz, 1H), 4.57 (d, *J* = 4.3 Hz, 1H), 4.40 (s, 1H), 3.77 (s, 3H), 1.79 (br, 2H), 1.66 (s, 3H), 1.50 (s, 3H).

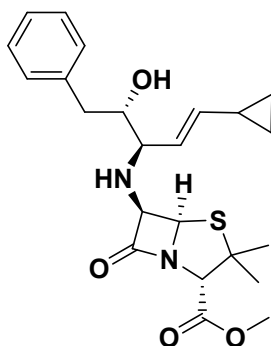

### (2*S*,3*R*,*E*)-5-Cyclopropyl-2-hydroxy-3-((2*S*,5*R*,6*R*)-2-methoxycarbonyl-3,3-dimethyl-1-aza-7-oxo-4-thiabicyclo[3.2.0]heptan-6-yl)amino-1-phenyl-4-pentene (**4a**)

General procedure B was followed using (4*R*,5*S*)-5-benzyl-2,2-dimethyl-4-hydroxy-1,3-dioxolane **2** (759 mg, 3.64 mmol, 0.2 M) in 18.2 mL of the solvent system of 9:1 EtOH–hexafluoroisopropanol (v/v), 6-APA methyl ester **1a** (1.26 g, 5.47 mmol, 1.5 equiv.) and (*E*)-2-cyclopropylvinylboronic acid **3** (590 mg, 5.27 mmol, 1.5 equiv.) to give the desired product **4a** as a pale yellow oil (834 mg, 53% yield). <sup>1</sup>H-NMR (400 MHz, CDCl<sub>3</sub>) δ: 7.31 – 7.19 (m, 5H), 5.47 (dd, *J* = 15.5, 9.0 Hz, 1H), 5.43 (d, *J* = 3.7 Hz, 1H), 5.20 (dd, *J* = 15.3, 8.6 Hz, 1H), 4.44 (d, *J* = 2.9 Hz, 1H), 4.40 (s, 1H), 4.03 – 3.95 (m, 1H), 3.77 (s, 3H), 3.16 (d, *J* = 9.1 Hz, 1H), 2.73 (d, *J* = 6.6 Hz, 2H), 2.42 (br, 2H), 1.65 (s, 3H), 1.49 (s, 3H), 1.47 – 1.42 (m, 1H), 0.77 (d, *J* = 8.0 Hz, 2H), 0.42 (s, 2H). <sup>13</sup>C-NMR (100 MHz, CDCl<sub>3</sub>) δ: 177.1, 168.8, 140.4, 138.4, 129.5, 128.6, 126.5, 124.3, 74.2, 70.6, 70.5, 67.3, 64.7, 64.3, 52.4, 40.1, 31.4, 27.4, 13.8, 7.0, 6.9. LRMS (ESI<sup>+</sup>) *m/z* calculated for C<sub>23</sub>H<sub>30</sub>N<sub>2</sub>O<sub>4</sub>S ([M+H]<sup>+</sup>): 431.19, found: 431.21.

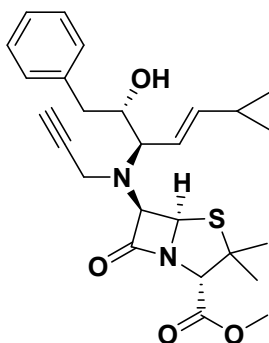

**(2*S*,3*R*,*E*)-5-Cyclopropyl-2-hydroxy-3-(((2*S*,5*R*,6*R*)-2-methoxycarbonyl-3,3-dimethyl-1-aza-7-oxo-4-thiabicyclo[3.2.0]heptan-6-yl)(2-propynyl)amino)-1-phenyl-4-pentene (5a)**

General procedure C was followed using **4a** (834 mg, 1.94 mmol, 0.2 M) and NaHCO<sub>3</sub> (1.63 g, 19.35 mmol, 10 equiv.) in DMF (9.7 mL) and propargyl bromide (2.2 mL, 19.35 mmol, 10 equiv., 80% in toluene) to give the desired compound **5a** (656 mg, 72% yield). <sup>1</sup>H-NMR (400 MHz, CDCl<sub>3</sub>) δ: 7.33 – 7.19 (m, 5H), 5.57 (dd, *J* = 15.4, 9.8 Hz, 1H), 5.30 (d, *J* = 3.7 Hz, 1H), 5.28 (dd, *J* = 15.0, 8.0 Hz, 1H), 4.48 (d, *J* = 4.0 Hz, 1H), 4.47 (s, 1H), 4.21 (d, *J* = 18.0 Hz, 1H), 3.79 (s, 3H), 3.74 (d, *J* = 18.5 Hz, 1H), 3.34 (dd, *J* = 9.7, 2.7 Hz, 1H), 2.78 (dd, *J* = 13.9, 8.0 Hz, 1H), 2.62 (dd, *J* = 14.0, 5.4 Hz, 1H), 2.22 (s, 1H), 1.67 (s, 3H), 1.57 – 1.49 (m, 1H), 1.48 (s, 3H), 0.83 (d, *J* = 8.1 Hz, 2H), 0.53 – 0.42 (m, 2H). <sup>13</sup>C-NMR (100 MHz, CDCl<sub>3</sub>) δ: 172.6, 168.7, 143.0, 138.8, 129.4, 128.5, 126.4, 121.1, 100.1, 74.3, 70.7, 70.5, 70.4, 69.3, 68.5, 63.8, 52.5, 39.9, 38.9, 31.2, 26.8, 13.9, 7.2, 7.0. LRMS (ESI<sup>+</sup>) *m/z* calculated for C<sub>26</sub>H<sub>32</sub>N<sub>2</sub>O<sub>4</sub>S ([M+H]<sup>+</sup>): 469.21, found: 469.51.

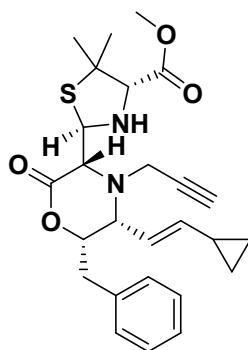

**(3*R*,5*R*,6*S*)-6-Benzyl-5-((*E*)-2-cyclopropylvinyl)-3-((2*R*,4*R*)-4-methoxycarbonyl-5,5-dimethylthiazolidin-2-yl)-4-propynylmorpholin-2-one (6a)**

To a stirred solution of **5a** (47.1 mg, 0.10 mmol) in toluene (1.0 mL), was added NaH (ca 60% mineral oil dispersion, 6.2 mg, 0.15 mmol, 1.5 equiv.) at 0 °C. After stirring at room temperature for 14 h under N<sub>2</sub>, 2 mL sat. NaHCO<sub>3</sub> aq. was added to the reaction mixture. The resulting mixture was extracted with ethyl acetate (3x2 mL), and combined organic layers were washed with brine and dried over Na<sub>2</sub>SO<sub>4</sub>. The solution was concentrated by rotary evaporation and the residue was purified by flash column chromatography (ISCO) to give **6a** as a colorless oil (23.4 mg, 50% yield). <sup>1</sup>H-NMR (400 MHz, C<sub>6</sub>D<sub>6</sub>) δ: 7.32 – 7.18 (m, 5H), 5.37 (t, 1H), 5.29 (dd, *J* = 15.2, 9.8 Hz, 1H), 5.19 (dd, *J* = 15.2, 8.5 Hz, 1H), 4.96 (d, *J* = 3.6 Hz, 1H), 4.26 (s, 1H), 3.69 – 3.58 (m, 2H), 3.54 (d, *J* = 3.5 Hz, 1H), 3.25 (d, *J* = 2.5 Hz, 1H), 3.20 (d, *J* = 2.3 Hz, 1H), 3.19 (s, 3H), 2.98 (dd, *J* = 14.2, 7.2 Hz, 1H), 2.65 (dd, *J* = 14.2, 7.4 Hz, 1H), 1.73 (s, 1H), 1.60 (s, 3H), 1.23 – 1.11 (m, 1H), 1.09 (s, 3H), 0.52 (d, *J* = 7.8 Hz, 2H), 0.28 – 0.24 (m, 2H).

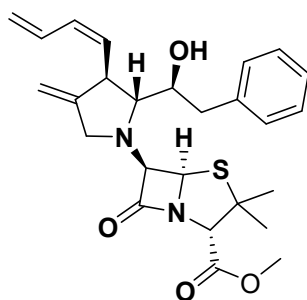

**(2*R*,3*R*)-3-((1*E*)-Buta-1,3-dienyl)-2-((*S*)-1-hydroxy-2-phenylethyl)-*N*-((2*S*,5*R*,6*R*)-2-methoxycarbonyl-3,3-dimethyl-1-aza-7-oxo-4-thiabicyclo[3.2.0]heptan-6-yl)-4-methylenepyrrolidine (7a)**

To a stirred solution of **5a** in benzene (76.3 mg, 0.16 mmol, 0.05 M), was added bis(triphenylphosphine)palladium acetate (24.0 mg, 0.03 mmol, 0.2 equiv.) at room temperature under N<sub>2</sub>. After stirring for 1 h at 80 °C, the resulting solution was concentrated by rotary evaporation and the residue was purified by flash column chromatography (ISCO) to give **7a** as a colorless oil (31.0 mg, 39% yield, 5/1 inseparable diastereomixture). Selected spectroscopic data for major diastereomer: <sup>1</sup>H-NMR (400 MHz, CDCl<sub>3</sub>) δ: 7.35 – 7.15 (m, 5H), 6.36 (dd, *J* = 11.3, 7.2 Hz, 1H), 6.18 (t, *J* = 11.6, 10.1 Hz, 1H), 5.60 (dd, *J* = 8.4, 7.5 Hz, 1H), 5.34 (d, *J* = 3.9 Hz, 1H), 5.21 (d, *J* = 16.8 Hz, 1H), 5.08 (d, *J* = 10.1 Hz, 1H), 5.00 (s, 1H), 4.90 (s, 1H), 4.51 (d, *J* = 4.0 Hz, 1H), 4.42 (s, 1H), 4.31 – 4.22 (m, 1H), 3.87 (d, *J* = 13.8 Hz, 1H), 3.78 (s, 3H), 3.55 (d, *J* = 13.1 Hz, 2H), 3.01 (d, *J* = 5.5 Hz, 1H), 2.82 (d, *J* = 7.3 Hz, 1H), 2.76 (d, *J* = 14.0 Hz, 1H), 1.69 (s, 3H), 1.48 (s, 3H). <sup>13</sup>C-NMR (100 MHz, C<sub>6</sub>D<sub>6</sub>) δ: 173.1, 168.1, 149.5, 139.8, 136.9, 135.8, 132.4, 129.7, 128.5, 126.2, 116.2, 107.1, 72.4, 72.3, 71.6, 69.9, 67.0, 64.4, 56.9, 51.4, 47.2, 39.6, 30.6, 26.5.

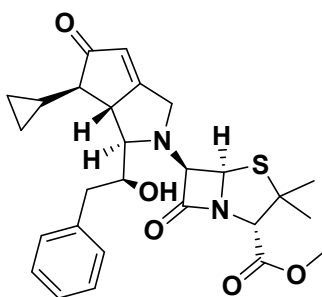

**(1*R*,2*R*,5*E*,8*R*)-8-Cyclopropyl-2-((*S*)-1-hydroxy-2-phenylethyl)-3-((2*S*,5*R*,6*R*)-2-methoxycarbonyl-3,3-dimethyl-1-aza-7-oxo-4-thiabicyclo[3.2.0]heptan-6-yl)-3-azabicyclo[3.3.0]oct-5-en-6-one (8a)**

To a stirred solution of **5a** in benzene (47.8 mg, 0.10 mmol, 0.1 M), was added Co<sub>2</sub>(CO)<sub>8</sub> (52.3 mg, 0.15 mmol, 1.5 equiv.) and 3Å molecular sieves (activated) at room temperature under N<sub>2</sub>. After stirring for 90 min at the same temperature, trimethylamine *N*-oxide (76.6 mg, 1.02 mmol, 10 equiv.) was added at 0 °C and the resulting indigo suspension was warmed to room temperature, opened to air and stirred for 4 h at room temperature. The suspension was filtered under vacuum, concentrated by rotary evaporation and the resulting residue was purified by flash column chromatography (ISCO) to give **8a** as a colorless oil (14.4 mg, 29% yield). <sup>1</sup>H-NMR (400 MHz, C<sub>6</sub>D<sub>6</sub>) δ: 7.37 – 7.19 (m, 4H), 7.14 – 7.06 (m, 1H), 5.65 (s, 1H), 5.00 (d, *J* = 3.7 Hz, 1H), 4.43 (s, 1H), 4.13 (d, *J* = 9.8 Hz, 1H), 4.09 (d, *J* = 3.6 Hz, 1H), 3.81 (d, *J* = 14.0 Hz, 1H), 3.37 (d, *J* = 15.7 Hz, 1H), 3.16 (s, 3H), 2.93 (dd, *J* = 13.8, 3.6 Hz, 1H),

2.88 (s, 1H), 2.66 (dd,  $J = 14.0, 3.1$  Hz, 1H), 2.59 (dd,  $J = 9.0, 2.0$  Hz, 1H), 1.64 (s, 1H), 1.32 (s, 3H), 1.21 (s, 3H), 0.81 – 0.72 (m, 2H), 0.61 – 0.50 (m, 1H), 0.39 – 0.26 (m, 2H).

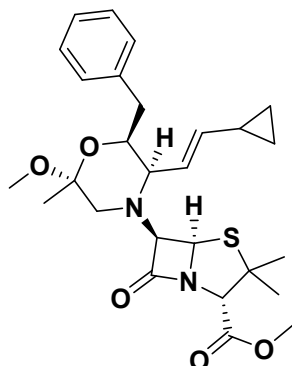

**(2R,5R,6S)-6-Benzyl-5-((E)-2-cyclopropylvinyl)-2-methoxy-4-((2S,5R,6R)-2-methoxycarbonyl-3,3-dimethyl-1-aza-7-oxo-4-thiabicyclo[3.2.0]heptan-6-yl)-2-methylmorpholine (9a)**

To a stirred solution of **5a** in MeOH (73.7 mg, 0.16 mmol, 0.05 M), was added NaAuCl<sub>4</sub>·2H<sub>2</sub>O (7.2 mg, 17.00 μmol, 0.1 equiv.) at room temperature under N<sub>2</sub>. After stirring for 1 h at room temperature, reaction mixture was concentrated by rotary evaporation and the resulting residue was purified by flash column chromatography (ISCO) to give **9a** as a colorless oil (28.6 mg, 31% yield). <sup>1</sup>H-NMR (400 MHz, CDCl<sub>3</sub>) δ: 7.26 – 7.15 (m, 5H), 5.87 (dd,  $J = 15.4, 10.1$  Hz, 1H), 5.30 (dd,  $J = 15.4, 8.8$  Hz, 1H), 5.22 (d,  $J = 4.0$  Hz, 1H), 4.43 (d,  $J = 4.0$  Hz, 1H), 4.35 (s, 1H), 4.29 – 4.23 (m, 1H), 3.75 (s, 3H), 3.36 (dd,  $J = 10.0, 2.5$  Hz, 1H), 2.92 (s, 3H), 2.80 (d,  $J = 11.5$  Hz, 1H), 2.67 (dd,  $J = 13.8, 8.8$  Hz, 1H), 2.61 (d,  $J = 11.5$  Hz, 1H), 2.54 (dd,  $J = 13.8, 5.1$  Hz, 1H), 1.70 (s, 3H), 1.54 – 1.47 (m, 1H), 1.44 (s, 3H), 1.25 (s, 3H), 0.77 (d,  $J = 8.0$  Hz, 2H), 0.47 – 0.39 (m, 2H). LRMS (ESI+) calculated for C<sub>27</sub>H<sub>36</sub>N<sub>2</sub>O<sub>5</sub>S [M+H]<sup>+</sup>: 501.23, found: 501.57.

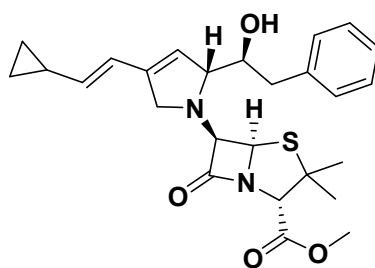

**(2R)-4-((E)-2-Cyclopropylvinyl)-2-((S)-1-hydroxy-2-phenylethyl)-N-((2S,5R,6R)-2-methoxycarbonyl-3,3-dimethyl-1-aza-7-oxo-4-thiabicyclo[3.2.0]heptan-6-yl)-3-pyrroline (10a)**

To a stirred solution of **5a** in CH<sub>2</sub>Cl<sub>2</sub> (56.7 mg, 0.12 mmol, 0.05 M), was added Grubbs catalyst second generation (11.0 mg, 12.70 μmol, 0.1 equiv.) at room temperature under N<sub>2</sub>. After stirring for 1 h under reflux, the reaction mixture was concentrated by rotary evaporation and the resulting residue was purified by flash column chromatography (ISCO) to give **10a** as a yellow oil (32.5 mg, 88% yield, *trans/cis* = 5.6/1, inseparable mixture). <sup>1</sup>H-NMR (400 MHz, CDCl<sub>3</sub>) δ: 7.32 – 7.27 (m, 4H), 7.23 – 7.17 (m, 1H), 6.28 (d,  $J = 15.8$  Hz, 1H), 5.58 (s, 1H), 5.36 (d,  $J = 3.6$  Hz, 1H), 5.03 (dd,  $J = 15.7, 8.9$  Hz, 1H), 4.50 (d,  $J = 3.4$

Hz, 1H), 4.43 (s, 1H), 4.20-4.07 (s, 2H), 4.15 – 4.09 (m, 1H), 3.77 (s, 3H), 3.50 (d,  $J = 10.3$  Hz, 1H), 2.84 (dd,  $J = 13.8, 8.4$  Hz, 1H), 2.72 (dd,  $J = 14.0, 5.1$  Hz, 1H), 1.67 (s, 3H), 1.47 (s, 3H), 1.45 – 1.40 (m, 1H), 0.79 (d,  $J = 8.4$  Hz, 2H), 0.45 – 0.38 (m, 2H).  $^{13}\text{C}$ -NMR (100 MHz,  $\text{CDCl}_3$ )  $\delta$ : 171.4, 168.7, 139.0, 137.0, 129.2, 128.4, 126.2, 121.2, 119.4, 75.08, 72.67, 72.05, 70.12, 65.6, 64.6, 59.4, 52.4, 39.4, 30.8, 26.8, 14.3, 7.6, 7.5.

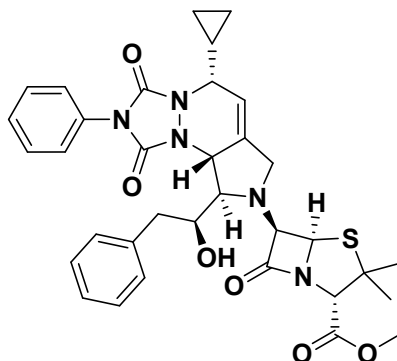

**Methyl (2S,5R)-6-((5R,9aR)-5-cyclopropyl-9-((R)-1-hydroxy-2-phenylethyl)-1,3-dioxo-2-phenyl-2,3,5,7,9,9a-hexahydro-1H,8H-pyrrolo[3,4-c][1,2,4]triazolo[1,2-a]pyridazin-8-yl)-3,3-dimethyl-7-oxo-4-thia-1-azabicyclo[3.2.0]heptane-2-carboxylate (11a)**

To a stirred solution of **10a** (*trans/cis* = 5.6/1) in  $\text{CH}_2\text{Cl}_2$  (28.9 mg, 0.06 mmol, 0.1 M), was added 4-phenyl-1,2,4-triazolin-3,5-dione (21.6 mg, 0.12 mmol, 2 equiv.) at room temperature under  $\text{N}_2$ . After stirring for 30 min at room temperature, the reaction mixture was concentrated by rotary evaporation and the resulting residue was purified by flash column chromatography (ISCO) to give **11a** as a colorless oil (14.5 mg, 37% yield).  $^1\text{H}$ -NMR (400 MHz,  $\text{CDCl}_3$ )  $\delta$ : 7.58 – 7.45 (m, 4H), 7.43 – 7.36 (m, 1H), 7.28 – 7.23 (m, 3H), 7.22 – 7.14 (m, 1H), 5.85 (s, 1H), 5.38 (d,  $J = 3.7$  Hz, 1H), 4.55 (s, 1H), 4.52 (d,  $J = 3.7$  Hz, 1H), 4.47 (s, 1H), 4.18 (dd,  $J = 8.2, 3.8$  Hz, 1H), 4.10 – 4.03 (m, 1H), 3.86 – 3.79 (m, 1H), 3.78 (s, 3H), 3.68 (d,  $J = 13.9$  Hz, 1H), 3.36 (d,  $J = 13.9$  Hz, 1H), 3.20 (d,  $J = 14.0$  Hz, 1H), 2.68 (dd,  $J = 14.0, 10.4$  Hz, 1H), 1.74 (s, 3H), 1.49 (s, 3H), 1.16 – 1.07 (m, 1H), 0.98 – 0.90 (m, 1H), 0.72 – 0.56 (m, 2H), 0.41 – 0.32 (m, 1H). LRMS (ESI+) calculated for  $\text{C}_{34}\text{H}_{37}\text{N}_5\text{O}_6\text{S}$   $[\text{M}+\text{H}]^+$ : 644.25, found: 644.70.

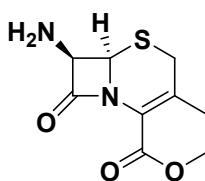

**7-amino-deacetoxycephalosporanic acid (7-ACDA) methyl ester (1b)**

General procedure A was followed using 7-ACDA (2.00 g, 9.34 mmol), methanol (4 mL), and (diazomethyl)trimethylsilane (4.7 mL, 9.34 mmol) to give the desired compound **1b** as a pale yellow solid (1.35 g, 64% yield).  $^1\text{H}$ -NMR (400 MHz,  $\text{CDCl}_3$ )  $\delta$ : 4.89 (s, 1H), 4.69 (s, 1H), 3.79 (s, 3H), 3.47 (d,  $J = 18.0$  Hz, 1H), 3.17 (d,  $J = 17.9$  Hz, 1H), 2.11 (s, 3H), 1.82 (s, 2H).

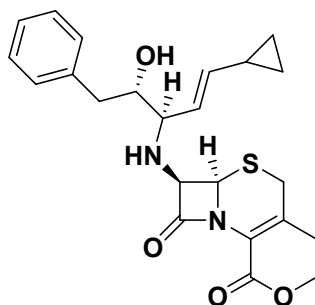

**Methyl (6R,7R)-7-(((4R,E)-1-cyclopropyl-4-hydroxy-5-phenylpent-1-en-3-yl)amino)-3-methyl-8-oxo-5-thia-1-azabicyclo[4.2.0]oct-2-ene-2-carboxylate (4b)**

General procedure B was followed using (4R,5S)-5-benzyl-2,2-dimethyl-4-hydroxy-1,3-dioxolane **2** (770 mg, 3.70 mmol, 0.2 M) in 18.5 mL of the solvent system of 9:1 EtOH–hexafluoroisopropanol (v/v), 7-ACDA methyl ester **1a** (1.27 g, 5.55 mmol, 1.5 equiv) and (*E*)-2-cyclopropylvinylboronic acid **3** (621 mg, 5.55 mmol, 1.5 equiv) to give the desired product **4b** as a pale yellow oil (1.03 g, 65% yield). <sup>1</sup>H-NMR (400 MHz, CDCl<sub>3</sub>) δ: 7.34 – 7.16 (m, 5H), 5.57 (dd, *J* = 14.4, 8.0 Hz, 1H), 5.25 (dd, *J* = 15.6, 8.7 Hz, 1H), 4.85 (d, *J* = 4.1 Hz, 1H), 4.57 (d, *J* = 5.1 Hz, 1H), 4.06 – 3.93 (m, 1H), 3.83 (s, 3H), 3.49 (d, *J* = 18.1 Hz, 1H), 3.23 (s, 1H), 3.20 (d, *J* = 13.4 Hz, 1H), 2.81 – 2.66 (m, 2H), 2.44 (br, 1H), 2.12 (s, 3H), 1.54 – 1.38 (m, 1H), 0.77 (d, *J* = 6.6 Hz, 2H), 0.49 – 0.38 (m, 2H). <sup>13</sup>C-NMR (100 MHz, CDCl<sub>3</sub>) δ: 166.9, 162.7, 142.1, 138.1, 129.4, 128.5, 128.5, 126.4, 122.7, 122.6, 66.4, 64.8, 60.4, 58.5, 52.3, 39.6, 20.1, 13.8, 7.0, 7.0. LRMS (ESI<sup>+</sup>) *m/z* calculated for C<sub>23</sub>H<sub>28</sub>N<sub>2</sub>O<sub>4</sub>S ([M+H]<sup>+</sup>): 429.18, found: 429.53.

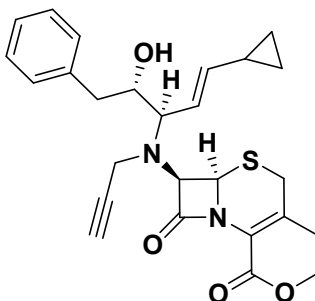

**Methyl (6R,7R)-7-(((4R,E)-1-cyclopropyl-4-hydroxy-5-phenylpent-1-en-3-yl)(prop-2-yn-1-yl)amino)-3-methyl-8-oxo-5-thia-1-azabicyclo[4.2.0]oct-2-ene-2-carboxylate (5b)**

General procedure C was followed using **4b** (897 mg, 2.09 mmol, 0.2 M) and NaHCO<sub>3</sub> (1.76 g, 20.93 mmol, 10 equiv.) in DMF (10.5 mL) and propargyl bromide (3.1 mL, 20.93 mmol, 10 equiv., 80% in toluene) to give the desired compound **5b** (640 mg, 66% yield). <sup>1</sup>H-NMR (400 MHz, CDCl<sub>3</sub>) δ: 7.35 – 7.19 (m, 5H), 5.73 (dd, *J* = 15.3, 9.5 Hz, 1H), 5.33 (dd, *J* = 15.5, 8.8 Hz, 1H), 4.80 (dd, *J* = 4.4 Hz, 1H), 4.72 (dd, *J* = 4.5 Hz, 1H), 4.10 – 4.07 (m, 1H), 3.99 (d, *J* = 17.8 Hz, 1H), 3.85 (s, 3H), 3.71 (d, *J* = 17.7 Hz, 1H), 3.51 (d, *J* = 18.3 Hz, 1H), 3.39 (dd, *J* = 9.6, 3.5 Hz, 1H), 3.23 (d, *J* = 18.3 Hz, 1H), 2.75 (d, *J* = 6.6 Hz, 2H), 2.51 (br, 1H), 2.23 (s, 1H), 2.12 (s, 3H), 1.57 – 1.46 (m, 1H), 0.79 (d, *J* = 8.0 Hz, 2H), 0.52 – 0.42 (m, 2H). <sup>13</sup>C-NMR (100 MHz, CDCl<sub>3</sub>) δ: 171.1, 162.9, 143.0, 138.6, 129.3, 128.4, 126.3, 122.5, 120.6, 73.6, 71.5, 69.7, 67.5, 60.4, 59.4, 52.4, 40.2, 39.9, 30.7, 20.0, 13.8, 7.1, 7.0. LRMS (ESI<sup>+</sup>) *m/z* calculated for C<sub>26</sub>H<sub>30</sub>N<sub>2</sub>O<sub>4</sub>S ([M+H]<sup>+</sup>): 467.20, found: 467.53.

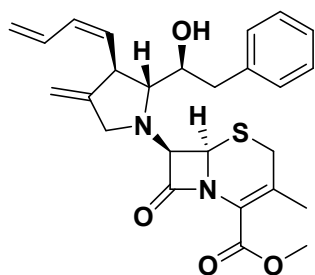

**Methyl (6R,7R)-7-((2R,3R)-3-((Z)-buta-1,3-dien-1-yl)-2-((S)-1-hydroxy-2-phenylethyl)-4-methylenepyrrolidin-1-yl)-3-methyl-8-oxo-5-thia-1-azabicyclo[4.2.0]oct-2-ene-2-carboxylate (7b)**

To a stirred solution of **5b** in benzene (57.8 mg, 0.12 mmol, 0.05 M), was added bis(triphenylphosphine)palladium acetate (18.4 mg, 25.00  $\mu$ mol, 0.2 equiv.) at room temperature under  $N_2$ . After stirring for 1 h at 80  $^{\circ}C$ , the resulting solution was concentrated by rotary evaporation and the residue was purified by flash column chromatography (ISCO) to give **7b** as a colorless oil (32.4 mg, 56% yield). Selected spectroscopic data for major diastereomer:  $^1H$ -NMR (400 MHz,  $C_6D_6$ )  $\delta$ : 7.42 – 7.20 (m, 5H), 6.28 (dd,  $J$  = 10.8, 9.4 Hz, 1H), 6.06 (dd,  $J$  = 15.2, 10.4 Hz, 1H), 5.57 (dd,  $J$  = 15.1, 8.7 Hz, 1H), 5.07 (d,  $J$  = 16.9 Hz, 1H), 4.95 (d,  $J$  = 8.4 Hz, 1H), 4.86 (dd,  $J$  = 14.6, 2.2 Hz, 1H), 4.20 (d,  $J$  = 4.4 Hz, 1H), 4.14 (d,  $J$  = 4.4 Hz, 1H), 3.95 (d,  $J$  = 13.8 Hz, 1H), 3.72 (d,  $J$  = 2.1 Hz, 1H), 3.63 – 3.56 (m, 1H), 3.54 (s, 3H), 3.25 (dd,  $J$  = 6.0, 2.5 Hz, 1H), 2.90 (d,  $J$  = 8.9 Hz, 1H), 2.78 (dd,  $J$  = 13.9, 4.2 Hz, 1H), 2.61 (d,  $J$  = 18.5 Hz, 1H), 2.29 (d,  $J$  = 18.1 Hz, 1H), 1.67 (s, 3H), 0.43 (br, 1H).  $^{13}C$ -NMR (100 MHz,  $C_6D_6$ )  $\delta$ : 163.7, 162.3, 149.7, 139.8, 136.9, 135.5, 132.3, 129.5, 128.2, 125.8, 122.8, 115.9, 106.8, 72.6, 71.6, 71.1, 57.4, 57.2, 51.6, 47.0, 39.5, 29.4, 19.2.

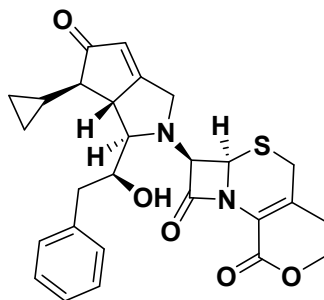

**Methyl (6R,7S)-7-((3S,3aS,4S)-4-cyclopropyl-3-((R)-1-hydroxy-2-phenylethyl)-5-oxo-3,3a,4,5-tetrahydrocyclopenta[c]pyrrol-2(1H)-yl)-3-methyl-8-oxo-5-thia-1-azabicyclo[4.2.0]oct-2-ene-2-carboxylate (8b)**

To a stirred solution of **5b** in benzene (80.0 mg, 0.17 mmol, 0.1 M), was added  $Co_2(CO)_8$  (87.9 mg, 0.26 mmol, 1.5 equiv.) and 3 $\text{\AA}$  molecular sieves (activated) at room temperature under  $N_2$ . After stirring for 90 min at the same temperature, trimethylamine *N*-oxide (128.78 mg, 1.71 mmol, 10 equiv.) was added at 0  $^{\circ}C$  and the resulting indigo suspension was warmed to room temperature, opened to air and stirred for 4 h at room temperature. The suspension was filtered under vacuum, concentrated by rotary evaporation and the resulting residue was purified by flash column chromatography (ISCO) to give **8a** as a colorless oil (24.4 mg, 30% yield).  $^1H$ -NMR (400 MHz,  $C_6D_6$ )  $\delta$ : 7.32 – 7.18 (m, 4H), 7.13 – 7.08 (m, 1H), 5.72 (s, 1H), 4.43 (d,  $J$  = 4.2 Hz, 1H), 4.17 (d,  $J$  = 4.2 Hz, 1H), 3.99 (d,  $J$  = 10.0 Hz, 1H), 3.71 (dd,  $J$  =

62.8, 15.6 Hz, 2H), 3.58 (s, 3H), 3.16 (s, 1H), 2.95 – 2.88 (m, 1H), 2.90 – 2.88 (m, 1H), 2.87 (s, 1H), 2.66 (d,  $J = 18.0$  Hz, 1H), 2.64 (s, 1H), 2.31 (d,  $J = 18.2$  Hz, 1H), 1.69 (s, 3H), 0.81 – 0.69 (m, 1H), 0.61 – 0.52 (m, 2H), 0.37 – 0.31 (m, 1H), 0.29 – 0.23 (m, 1H).  $^{13}\text{C-NMR}$  (100 MHz,  $\text{C}_6\text{D}_6$ )  $\delta$ : 178.6, 163.3, 162.8, 129.8, 128.9, 128.8, 128.7, 126.7, 124.2, 122.9, 71.8, 71.5, 70.5, 57.5, 54.2, 52.1, 51.9, 39.0, 38.7, 30.3, 19.5, 11.9, 3.6, 3.3. LRMS (ESI<sup>+</sup>)  $m/z$  calculated for  $\text{C}_{27}\text{H}_{30}\text{N}_2\text{O}_5\text{S}$  ( $[\text{M}+\text{H}]^+$ ): 495.19, found: 495.56.

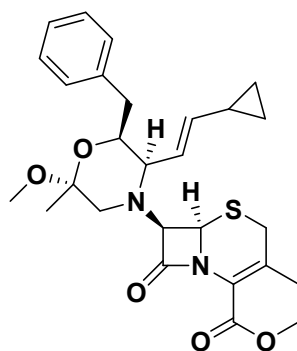

**Methyl (6R,7R)-7-((6R)-6-benzyl-5-((E)-2-cyclopropylvinyl)-2-methoxy-2-methylmorpholino)-3-methyl-8-oxo-5-thia-1-azabicyclo[4.2.0]oct-2-ene-2-carboxylate (9b)**

To a stirred solution of **5b** in MeOH (33.7 mg, 0.07 mmol, 0.05 M), was added  $\text{NaAuCl}_4 \cdot 2\text{H}_2\text{O}$  (2.9 mg, 7.00  $\mu\text{mol}$ , 0.1 equiv.) at room temperature under  $\text{N}_2$ . After stirring for 1 h at room temperature, reaction mixture was concentrated by rotary evaporation and the resulting residue was purified by flash column chromatography (ISCO) to give **9b** as a colorless oil (12.0 mg, 33% yield).  $^1\text{H-NMR}$  (400 MHz,  $\text{CDCl}_3$ )  $\delta$ : 7.28 – 7.13 (m, 5H), 5.86 (dd,  $J = 15.5, 9.9$  Hz, 1H), 5.49 (dd,  $J = 15.4, 8.9$  Hz, 1H), 4.78 (d,  $J = 4.4$  Hz, 1H), 4.39 (d,  $J = 4.3$  Hz, 1H), 4.33 – 4.27 (m, 1H), 3.85 (s, 3H), 3.61 (d,  $J = 10.6$  Hz, 1H), 3.45 (d,  $J = 18.1$  Hz, 1H), 3.21 (d,  $J = 18.2$  Hz, 1H), 2.94 (s, 3H), 2.73 (q,  $J = 11.1$  Hz, 2H), 2.66 (d,  $J = 8.4$  Hz, 1H), 2.57 (d,  $J = 5.1$  Hz, 1H), 2.06 (s, 3H), 1.58 – 1.48 (m, 1H), 1.28 (s, 3H), 0.83 – 0.73 (m, 2H), 0.52 – 0.43 (m, 2H).  $^{13}\text{C-NMR}$  (100 MHz,  $\text{CDCl}_3$ )  $\delta$ : 163.1, 162.7, 143.5, 138.8, 129.3, 128.4, 126.3, 122.8, 117.0, 96.8, 72.3, 71.4, 60.0, 59.4, 57.1, 54.2, 52.3, 48.1, 38.7, 30.9, 21.9, 20.2, 14.1, 7.0, 7.0. LRMS (ESI<sup>+</sup>) calculated for  $\text{C}_{27}\text{H}_{34}\text{N}_2\text{O}_5\text{S}$  ( $[\text{M}+\text{H}]^+$ ): 499.22, found: 499.55.

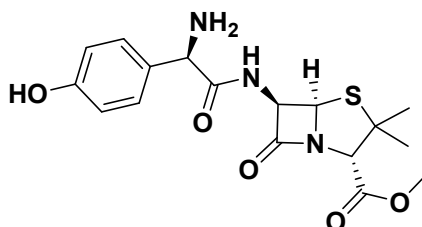

**Amoxicillin methyl ester (1c)**

General procedure A was followed using amoxicillin (500 mg, 1.37 mmol), methanol (1 mL), and (diazomethyl)trimethylsilane (685  $\mu\text{L}$ , 1.37 mmol) to give the desired compound **1c** as a pale yellow solid (383 g, 74% yield).  $^1\text{H-NMR}$  (400 MHz,  $\text{CDCl}_3$ )  $\delta$ : 8.10 (br, 1H), 7.06 (d,  $J$



= 7.8 Hz, 2H), 6.61 (d,  $J = 7.7$  Hz, 2H), 5.60 (s, 1H), 5.52 (s, 1H), 4.44 (s, 2H), 4.28 (br, 2H), 3.77 (s, 3H), 1.61 (s, 3H), 1.47 (s, 3H).

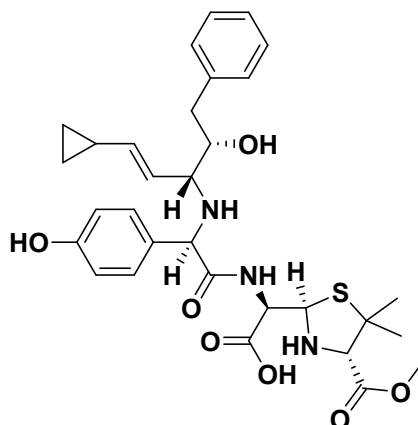

**(R)-2-((R)-2-(((3R,4S,E)-1-cyclopropyl-4-hydroxy-5-phenylpent-1-en-3-yl)amino)-2-(4-hydroxyphenyl)acetamido)-2-((2R,4S)-4-(methoxycarbonyl)-5,5-dimethylthiazolidin-2-yl)acetic acid (4c)**

General procedure B was followed using (4R,5S)-5-benzyl-2,2-dimethyl-4-hydroxy-1,3-dioxolane **2** (526 mg, 2.52 mmol, 0.2 M) in 12.5 mL of the solvent system of 9:1 EtOH–hexafluoroisopropanol (v/v), AMX methyl ester **1c** (1.14 g, 3.00 mmol, 1.2 equiv) and (*E*)-2-cyclopropylvinylboronic acid **3** (418 mg, 2.88 mmol, 1.5 equiv) to give the desired product **4c** as a pale yellow solid (671 mg, 46% yield).  $^1\text{H-NMR}$  (400 MHz,  $\text{CDCl}_3$ )  $\delta$ : 7.37 (d,  $J = 9.1$  Hz, 2H), 7.33 – 7.21 (m, 5H), 7.17 (d,  $J = 6.9$  Hz, 2H), 6.66 (d,  $J = 6.8$  Hz, 2H), 5.52 (dd,  $J = 15.4, 8.7$  Hz, 1H), 5.15 – 5.12 (m, 1H), 5.11 (dd,  $J = 15.4, 8.9$  Hz, 1H), 4.58 (dd,  $J = 8.9, 3.3$  Hz, 1H), 4.36 (s, 1H), 3.95 – 3.84 (m, 1H), 3.67 (s, 3H), 3.49 (s, 1H), 3.08 (d,  $J = 9.1$  Hz, 1H), 2.76 (ddt,  $J = 3.8, 3.1$  Hz, 1H), 2.70 (d,  $J = 9.3$  Hz, 1H), 1.51 (s, 3H), 1.49 – 1.42 (m, 1H), 1.18 (s, 3H), 0.78 (d,  $J = 7.2$  Hz, 2H), 0.42 (d,  $J = 5.1$  Hz, 2H).  $^{13}\text{C-NMR}$  (100 MHz,  $\text{CDCl}_3$ )  $\delta$ : 173.0, 169.9, 169.7, 140.6, 129.4, 129.3, 128.5, 126.5, 126.3, 123.1, 116.1, 74.2, 72.7, 65.8, 63.2, 62.6, 58.8, 57.1, 52.3, 39.5, 26.5, 26.2, 13.7, 7.1, 7.0.

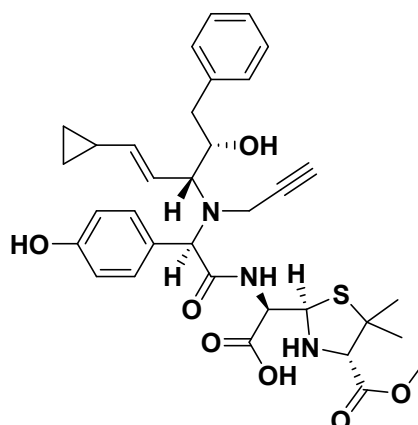

**(R)-2-((R)-2-(((3R,4S,E)-1-cyclopropyl-4-hydroxy-5-phenylpent-1-en-3-yl)(prop-2-yn-1-yl)amino)-2-(4-hydroxyphenyl)acetamido)-2-((2R,4S)-4-(methoxycarbonyl)-5,5-dimethylthiazolidin-2-yl)acetic acid (5c)**

General procedure C was followed using **4c** (671 mg, 1.16 mmol, 0.2 M) and NaHCO<sub>3</sub> (145 mg, 1.74 mmol, 1.5 equiv.) in DMF (5.8 mL) and propargyl bromide (155  $\mu$ L, 1.39 mmol, 1.2 equiv., 80% in toluene) at room temperature to give the desired compound **5c** (404 mg, 56% yield). <sup>1</sup>H-NMR (400 MHz, CDCl<sub>3</sub>)  $\delta$ : 7.99 (d,  $J$  = 8.8 Hz, 1H), 7.32 – 7.24 (m, 3H), 7.22 – 7.15 (m, 2H), 7.05 (d,  $J$  = 8.1 Hz, 2H), 6.57 (d,  $J$  = 8.1 Hz, 2H), 5.78 (dd,  $J$  = 15.4, 8.9 Hz, 1H), 5.11 (dd,  $J$  = 15.4, 8.9 Hz, 1H), 5.06 (d,  $J$  = 5.9 Hz, 1H), 4.71 (s, 1H), 4.67 (d,  $J$  = 5.9 Hz, 2H), 4.22 – 4.10 (m, 1H), 3.79 (s, 1H), 3.72 (s, 3H), 3.54 (d,  $J$  = 17.6 Hz, 1H), 3.33 (s, 1H), 3.28 (d,  $J$  = 17.5 Hz, 1H), 2.80 (dd,  $J$  = 4.1, 3.4 Hz, 1H), 2.64 (dd,  $J$  = 13.7, 8.9 Hz, 1H), 2.15 (s, 1H), 1.54 (s, 3H), 1.52 – 1.43 (m, 1H), 1.19 (s, 3H), 0.76 (d,  $J$  = 8.1 Hz, 2H), 0.46 – 0.37 (m, 2H). <sup>13</sup>C-NMR (100 MHz, CDCl<sub>3</sub>)  $\delta$ : 173.8, 170.1, 169.8, 142.5, 131.1, 129.5, 128.5, 127.0, 126.3, 120.9, 115.8, 81.3, 73.6, 73.0, 72.6, 68.4, 66.2, 66.2, 58.9, 57.2, 52.3, 41.4, 39.2, 27.1, 26.9, 13.9, 7.1, 7.0.

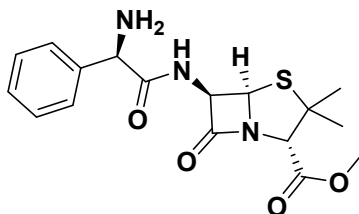

**Ampicillin methyl ester (1d)**

General procedure A was followed using amoxicillin (500 mg, 1.37 mmol), methanol (1 mL), and (diazomethyl)trimethylsilane (685  $\mu$ L, 1.37 mmol) to give the desired compound **1d** as a pale yellow solid (383 g, 74% yield). <sup>1</sup>H NMR (400 MHz, CDCl<sub>3</sub>)  $\delta$ : 8.03 (d,  $J$  = 9.2 Hz, 1H), 7.29 – 7.42 (m, 5H), 5.68 (dd,  $J$  = 9.4, 4.1 Hz, 1H), 5.56 (d,  $J$  = 4.2 Hz, 1H), 4.60 (s, 1H), 4.47 (s, 1H), 3.79 (s, 3H), 2.62 (br, 2H), 1.66 (s, 3H), 1.51 (s, 3H).

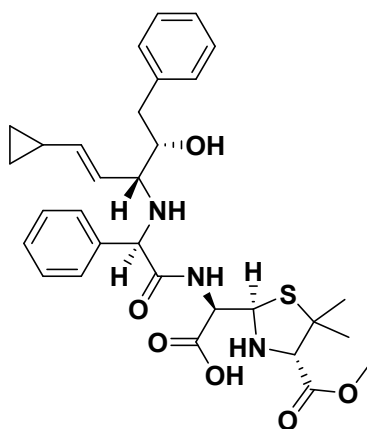

**(R)-2-((R)-2-(((3R,4S,E)-1-cyclopropyl-4-hydroxy-5-phenylpent-1-en-3-yl)amino)-2-phenylacetamido)-2-((2R,4S)-4-(methoxycarbonyl)-5,5-dimethylthiazolidin-2-yl)acetic acid (4d)**

General procedure B was followed using (4R,5S)-5-benzyl-2,2-dimethyl-4-hydroxy-1,3-dioxolane **2** (200 mg, 0.96 mmol, 0.2 M) in 4.8 mL of the solvent system of 9:1 EtOH–hexafluoroisopropanol (v/v), AMP methyl ester **1d** (418 mg, 1.15 mmol, 1.2 equiv) and (*E*)-2-cyclopropylvinylboronic acid **3** (161 mg, 1.44 mmol, 1.5 equiv) to give the desired product **4d** as a pale yellow solid (234 mg, 41% yield). <sup>1</sup>H-NMR (400 MHz, CDCl<sub>3</sub>) δ: 7.73 (s, 1H), 7.49 – 7.08 (m, 10H), 5.53 (dd, *J* = 15.3, 8.7 Hz, 1H), 5.13 (d, *J* = 3.8 Hz, 1H), 5.08 (dd, *J* = 15.3, 8.7 Hz, 1H), 4.60 (dd, *J* = 9.1, 3.8 Hz, 1H), 4.42 (s, 1H), 3.86 – 3.70 (m, 2H), 3.68 (s, 3H), 3.46 (s, 1H), 3.01 (dd, *J* = 8.8, 3.7 Hz, 1H), 2.78 (dd, *J* = 13.9, 3.8 Hz, 1H), 2.67 (dd, *J* = 13.8, 9.2 Hz, 1H), 2.45 (s, 1H), 2.29 (br, 1H), 1.48 (s, 3H), 1.48 – 1.41 (m, 1H), 1.17 (s, 3H), 0.84 – 0.67 (m, 2H), 0.48 – 0.29 (m, 2H). <sup>13</sup>C-NMR (100 MHz, CDCl<sub>3</sub>) δ: 169.8, 169.7, 164.8, 142.8, 129.3, 129.1, 128.5, 126.3, 122.3, 76.0, 72.7, 65.5, 62.8, 62.7, 58.6, 57.0, 52.2, 39.7, 26.5, 26.3, 13.7, 7.1, 7.0.

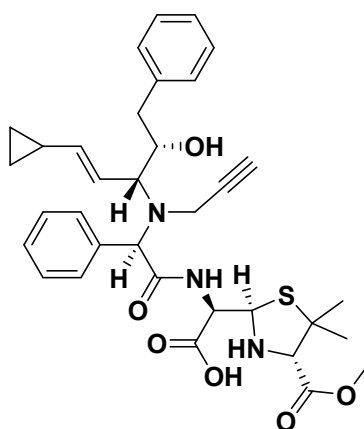

**(R)-2-((R)-2-(((3R,4S,E)-1-cyclopropyl-4-hydroxy-5-phenylpent-1-en-3-yl)(prop-2-yn-1-yl)amino)-2-phenylacetamido)-2-((2R,4S)-4-(methoxycarbonyl)-5,5-dimethylthiazolidin-2-yl)acetic acid (**5d**)**

General procedure C was followed using **4d** (108 mg, 0.19 mmol, 0.2 M) and NaHCO<sub>3</sub> (24.1 mg, 0.29 mmol, 1.5 equiv.) in DMF (1.0 mL) and propargyl bromide (25 μL, 0.23 mmol, 1.2 equiv., 80% in toluene) at room temperature to give the desired compound **5d** (44.0 mg, 38% yield). <sup>1</sup>H-NMR (400 MHz, CDCl<sub>3</sub>) δ: 7.73 (s, 1H), 7.36 – 7.16 (m, 10H), 5.81 (dd, *J* = 15.3, 9.5 Hz, 1H), 5.18 – 5.07 (m, 1H), 5.05 (d, *J* = 5.9 Hz, 1H), 4.84 (s, 1H), 4.71 (dd, *J* = 9.1, 6.0 Hz, 1H), 4.16 – 4.11 (m, 1H), 3.75 (s, 1H), 3.74 (s, 3H), 3.64 – 3.52 (m, 1H), 3.43 – 3.30 (m, 2H), 2.84 – 2.74 (m, 1H), 2.73 – 2.63 (m, 1H), 2.16 (br, 1H), 1.69 – 1.57 (m, 1H), 1.51 (s, 3H), 1.19 (s, 3H), 0.82 – 0.74 (m, 2H), 0.49 – 0.39 (m, 2H). <sup>13</sup>C-NMR (100 MHz, CDCl<sub>3</sub>) δ: 173.4, 170.2, 169.8, 148.6, 129.8, 129.3, 128.4, 126.3, 121.5, 78.5, 73.5, 73.2, 72.4, 68.4, 66.2, 66.1, 58.7, 56.7, 52.2, 41.4, 39.4, 27.0, 26.8, 13.8, 7.0, 6.9.

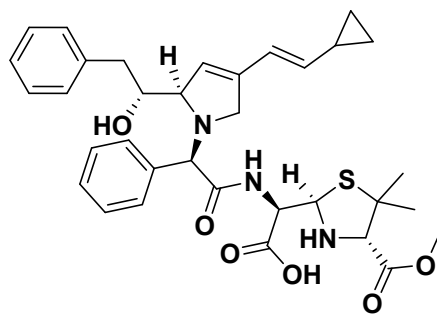

**(2R)-2-((2R)-2-(4-((E)-2-cyclopropylvinyl)-2-((R)-1-hydroxy-2-phenylethyl)-2,5-dihydro-1H-pyrrol-1-yl)-2-phenylacetamido)-2-((2R,4S)-4-(methoxycarbonyl)-5,5-dimethylthiazolidin-2-yl)acetic acid (10d)**

To a stirred solution of **5d** in  $\text{CH}_2\text{Cl}_2$  (20.0 mg, 0.03 mmol, 0.05 M), was added Grubbs catalyst second generation (2.8 mg, 3.30  $\mu\text{mol}$ , 0.1 equiv.) at room temperature under  $\text{N}_2$ . After stirring for 1 h under reflux, the reaction mixture was concentrated by rotary evaporation and the resulting residue was purified by flash column chromatography (ISCO) to give **10a** as a yellow oil (11.9 mg, 60% yield).  $^1\text{H-NMR}$  (400 MHz,  $\text{CDCl}_3$ )  $\delta$ : 7.47 – 7.15 (m, 10H), 7.04 – 6.91 (m, 1H), 6.29 (d,  $J = 15.8$  Hz, 1H), 5.60 (d,  $J = 51.8$  Hz, 1H), 5.22 – 5.13 (m, 1H), 5.10 – 5.00 (m, 1H), 4.83 (s, 1H), 4.70 (dd,  $J = 8.9, 5.4$  Hz, 1H), 4.20 – 4.07 (m, 2H), 4.15 – 4.09 (m, 1H), 3.77 (s, 3H), 3.58 – 3.48 (m, 1H), 3.37 (s, 1H), 2.71 – 2.62 (m, 1H), 2.52 (dd,  $J = 13.7, 5.3$  Hz, 1H), 1.51 (s, 3H), 1.50 – 1.38 (m, 1H), 1.22 (s, 3H), 0.82 – 0.74 (m, 2H), 0.47 – 0.38 (m, 2H).

$^1\text{H NMR}$  ( $\text{CDCl}_3$ , 400 MHz)

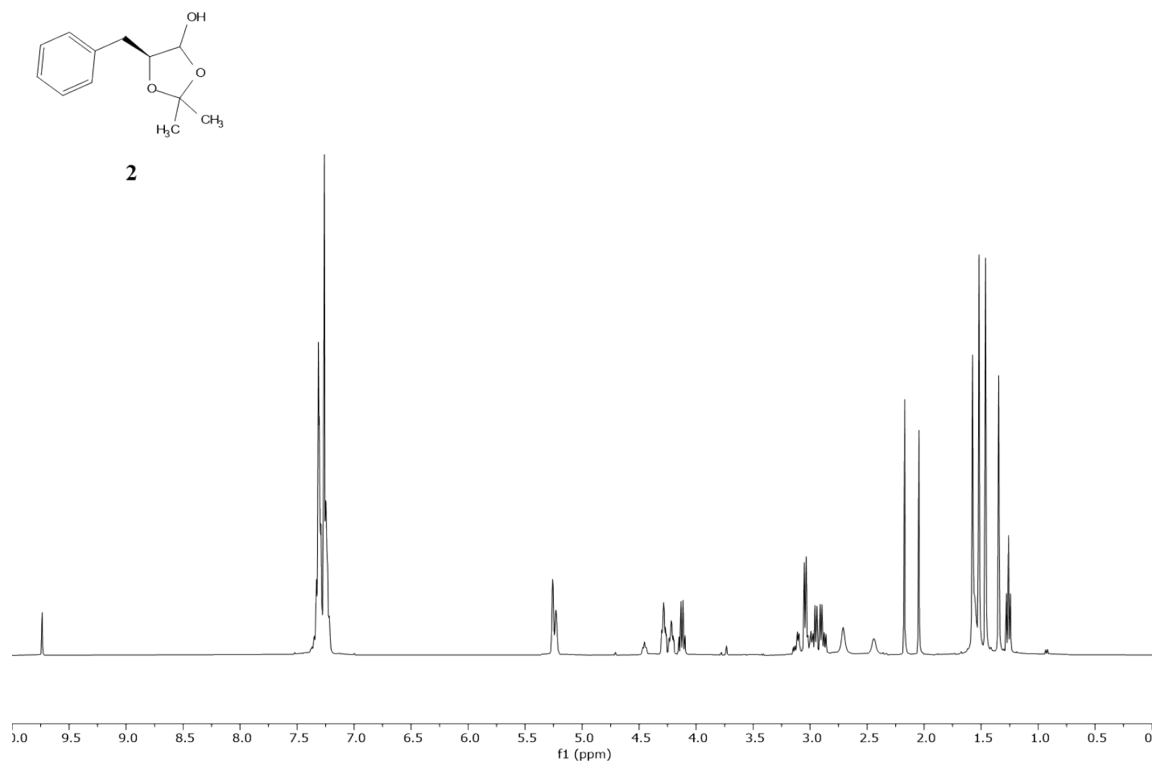

$^1\text{H}$  NMR ( $\text{CDCl}_3$ , 400 MHz)

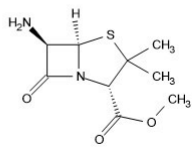

**1a**

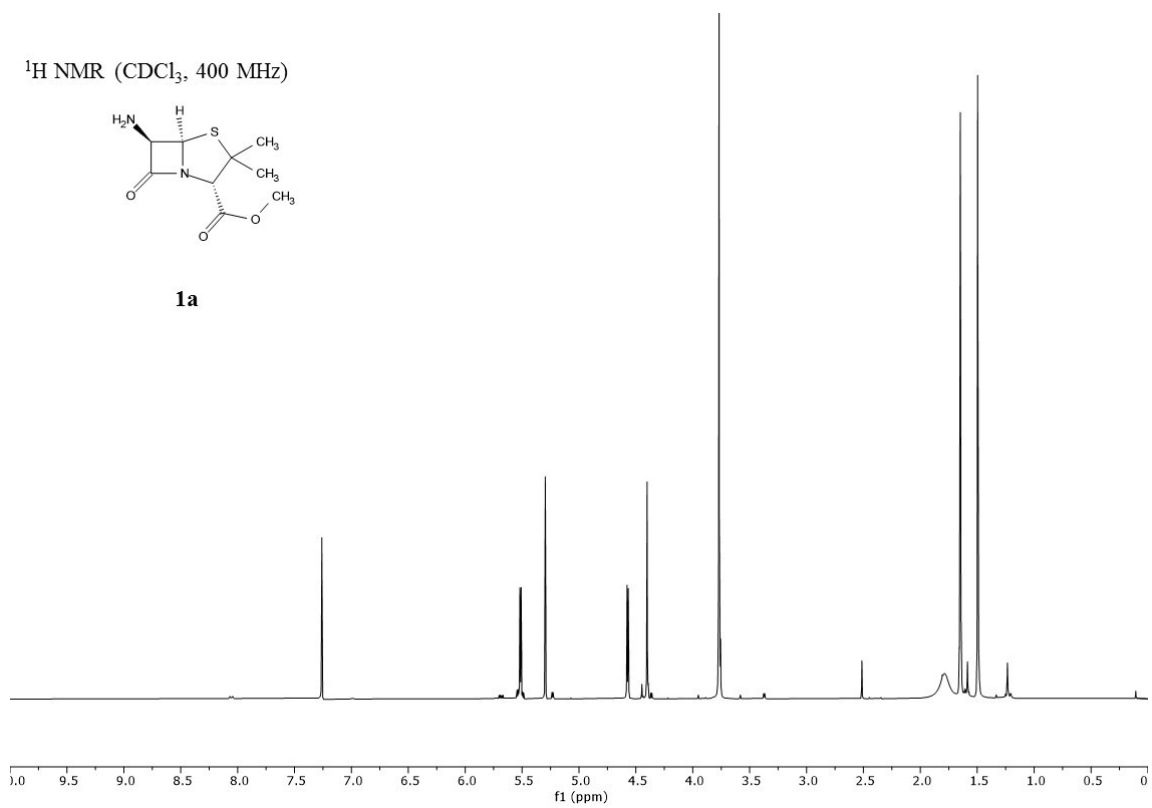

$^1\text{H}$  NMR ( $\text{CDCl}_3$ , 400 MHz)

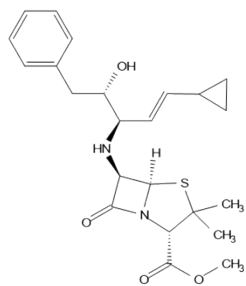

**4a**

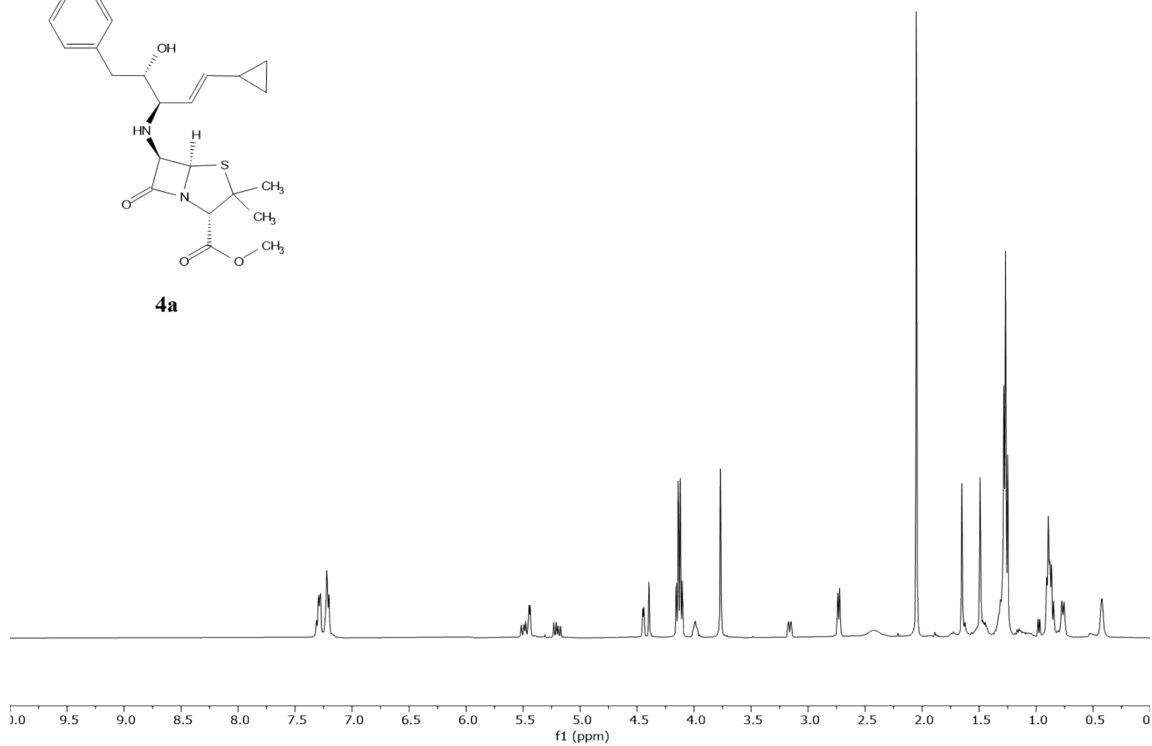

$^{13}\text{C}$  NMR ( $\text{CDCl}_3$ , 100 MHz)

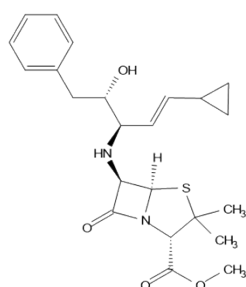

**4a**

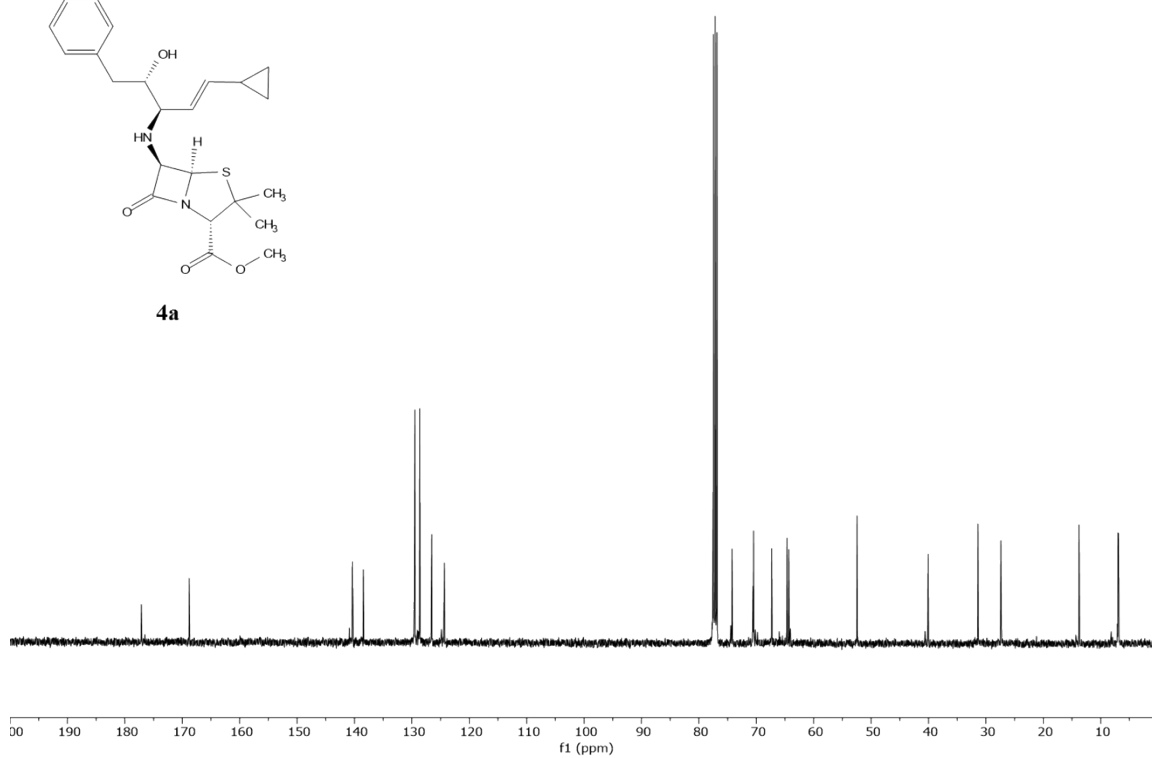

$^1\text{H}$  NMR ( $\text{CDCl}_3$ , 400 MHz)

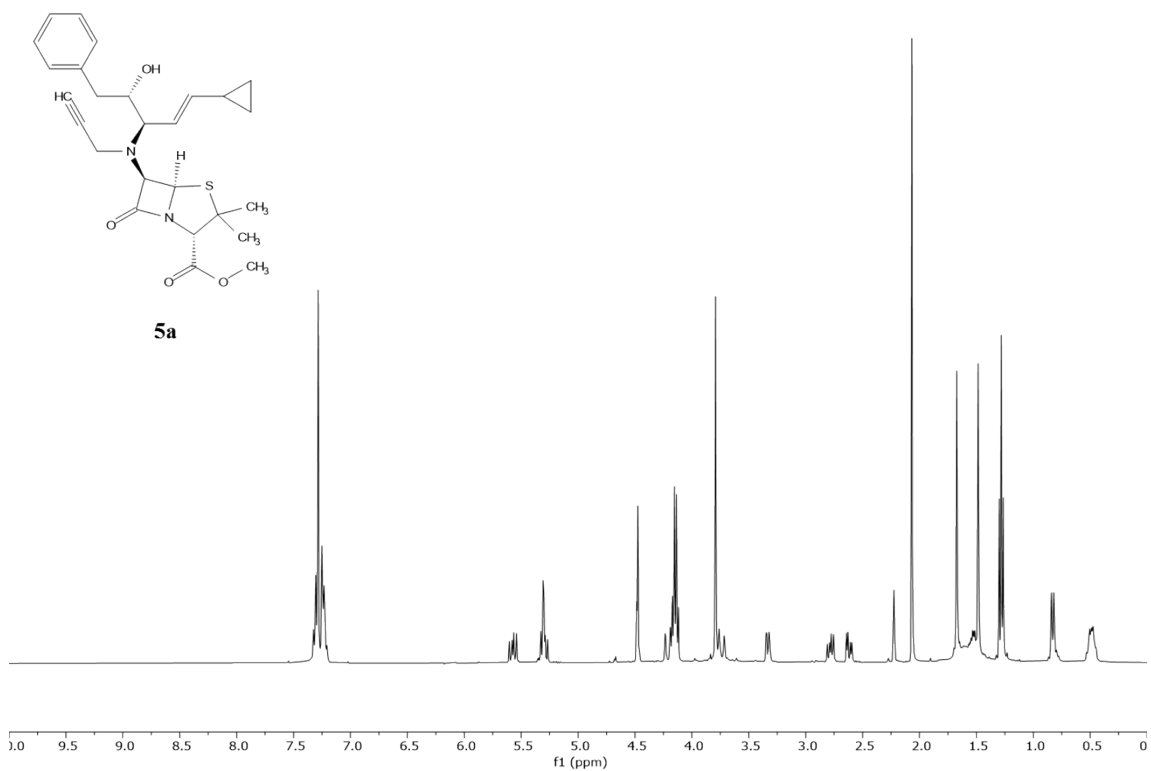

$^{13}\text{C}$  NMR ( $\text{CDCl}_3$ , 100 MHz)

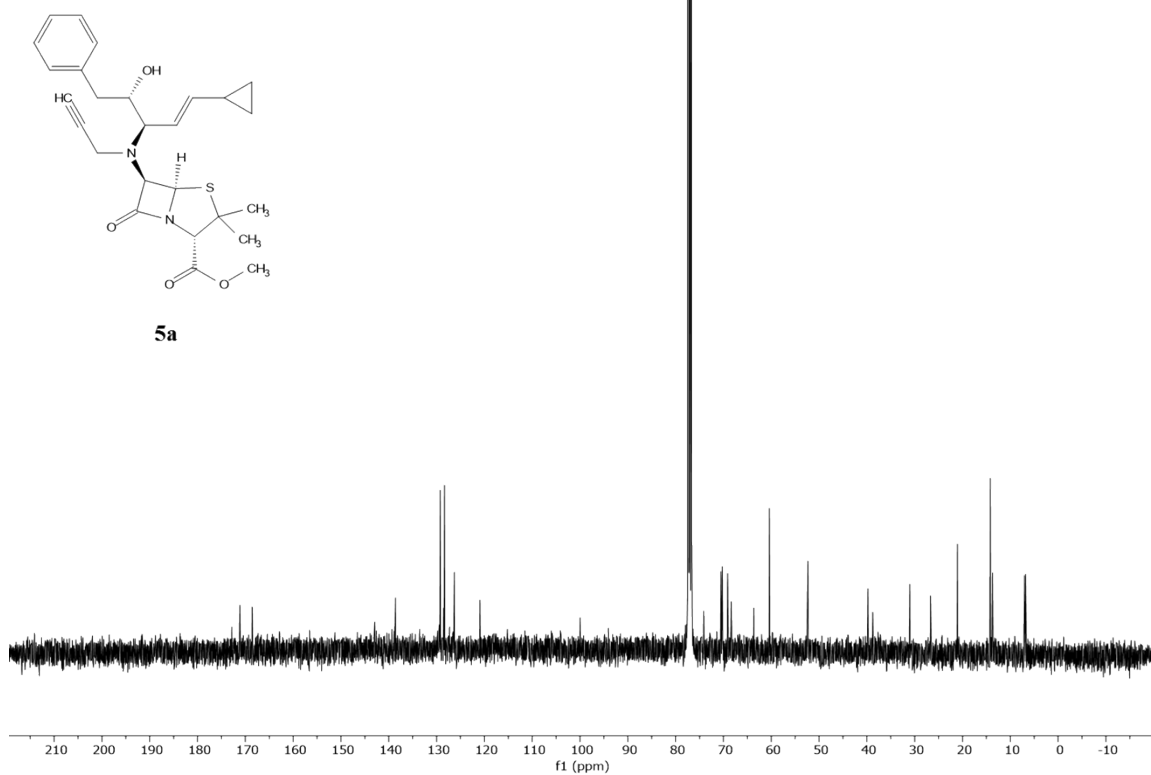

$^1\text{H NMR}$  ( $\text{C}_6\text{D}_6$ , 400 MHz)

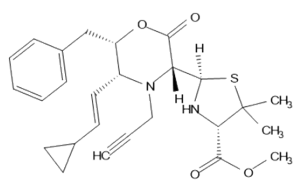

**6a**

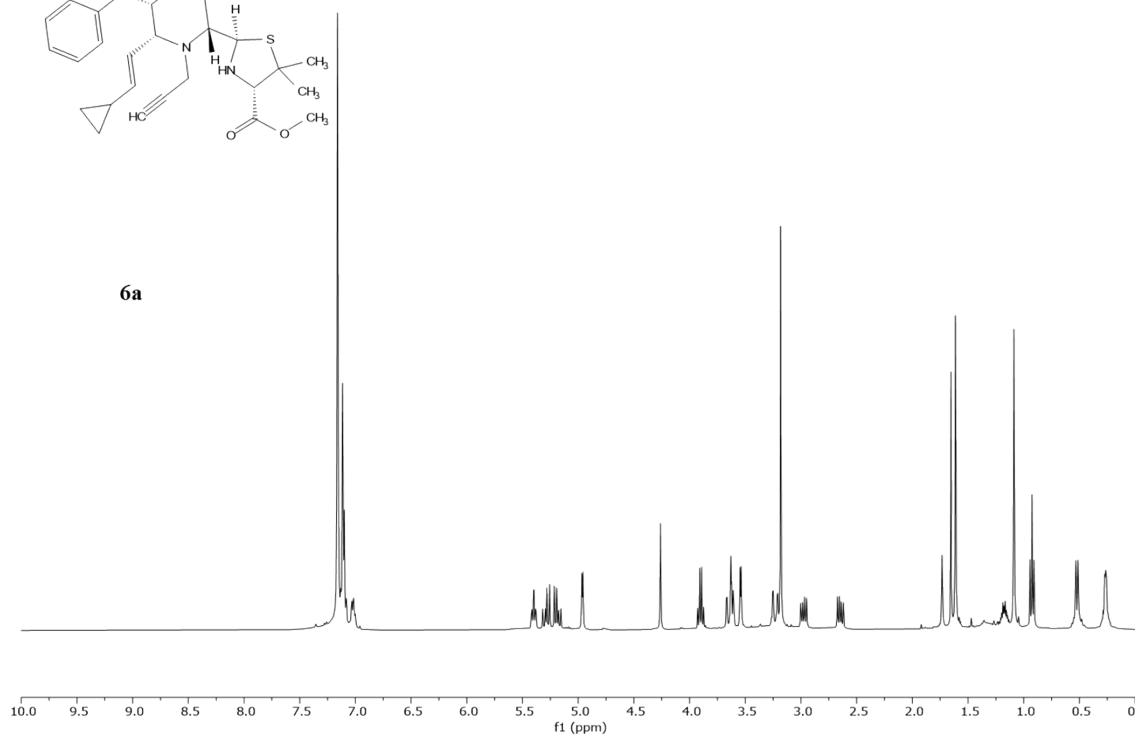



$^1\text{H}$  NMR ( $\text{CDCl}_3$ , 400 MHz)

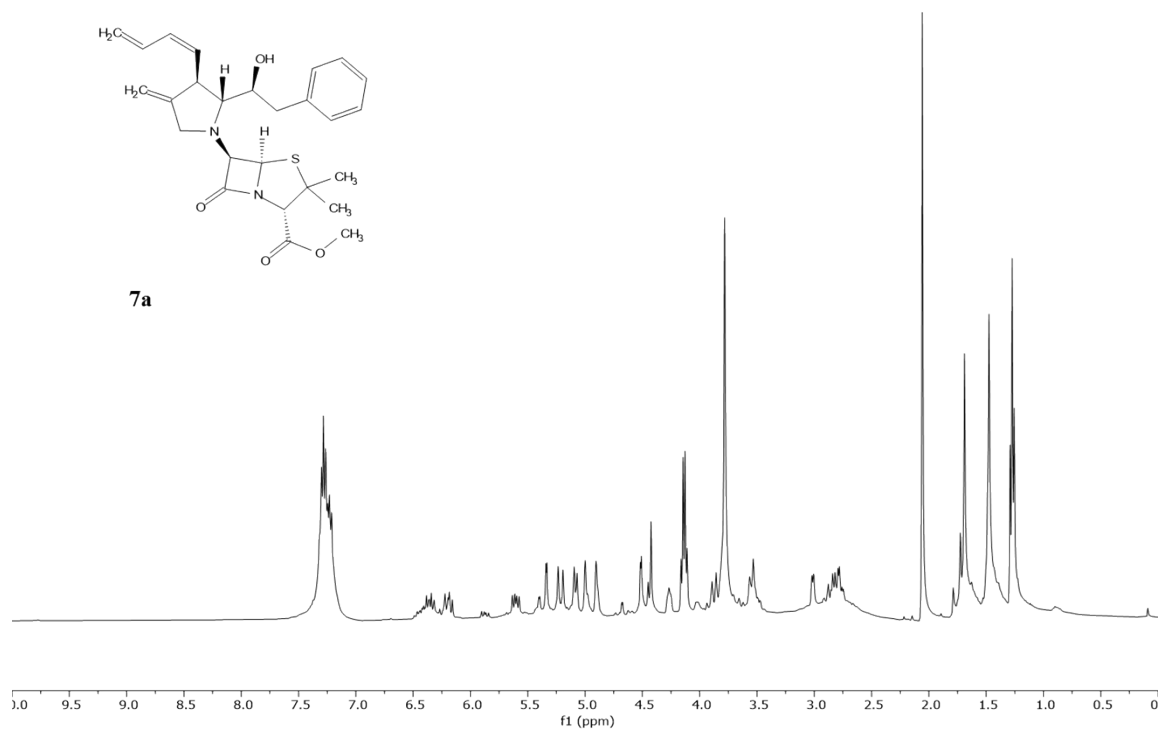

$^1\text{H}$  COSY NMR ( $\text{CDCl}_3$ , 400 MHz)

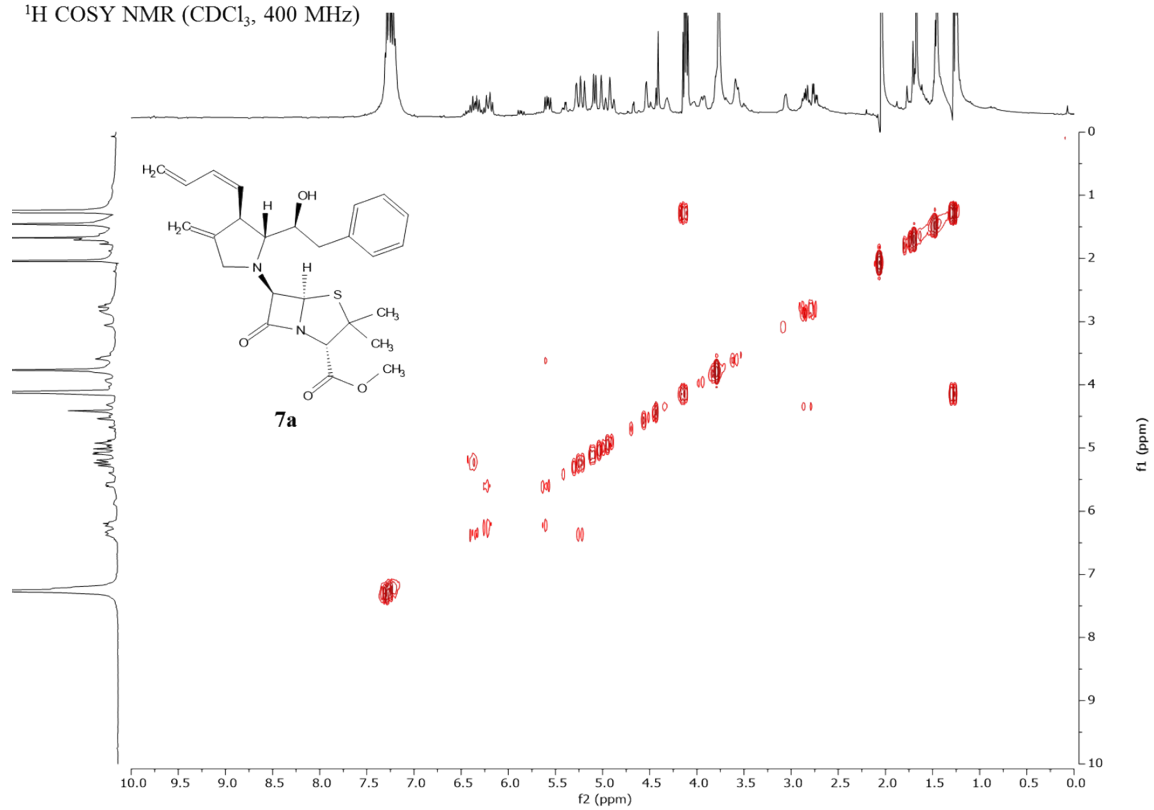

$^1\text{H}$ - $^{13}\text{C}$  HSQC NMR ( $\text{CDCl}_3$ , 400/100 MHz)

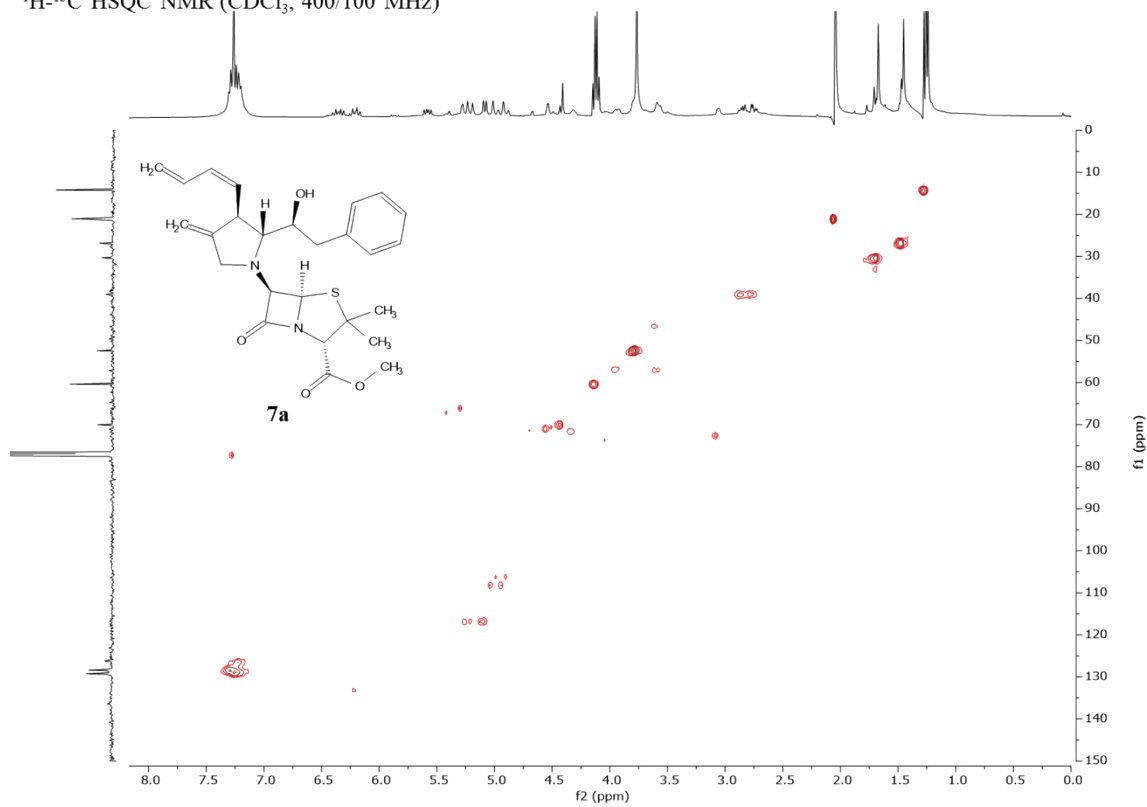

$^1\text{H}$ - $^{13}\text{C}$  HMBC NMR ( $\text{CDCl}_3$ , 400/100 MHz)

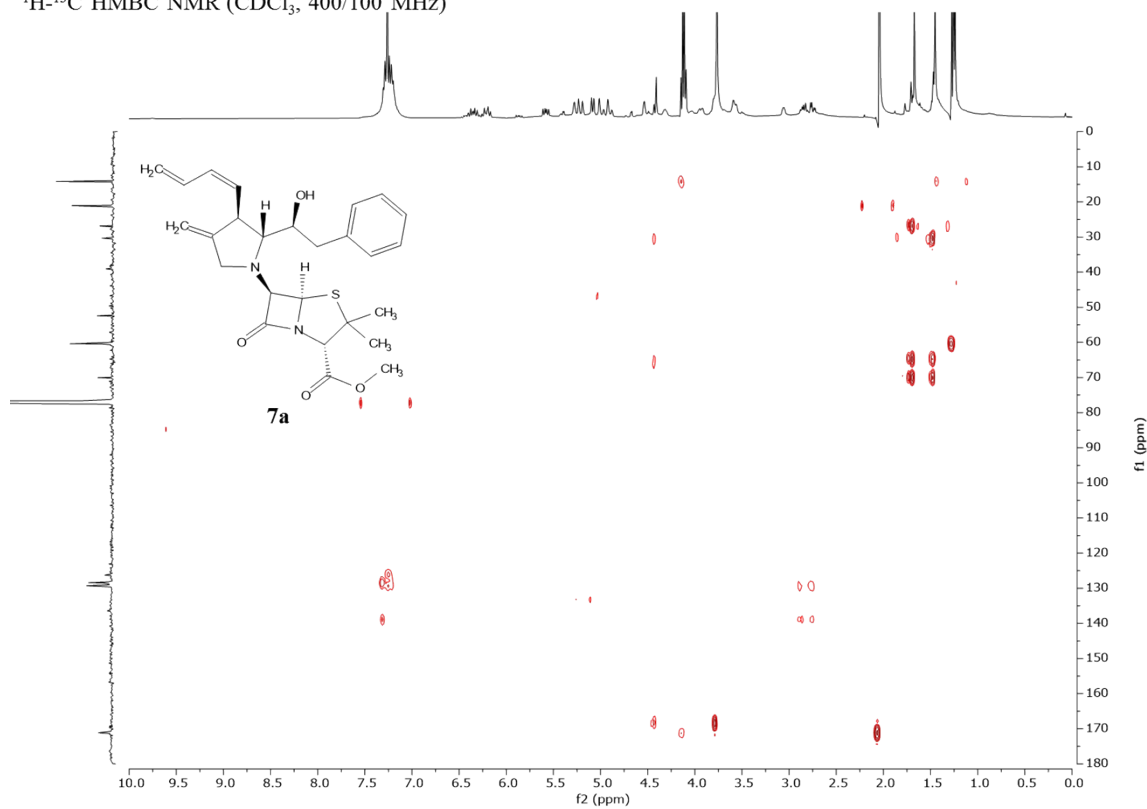

$^1\text{H}$  NMR ( $\text{C}_6\text{D}_6$ , 400 MHz)

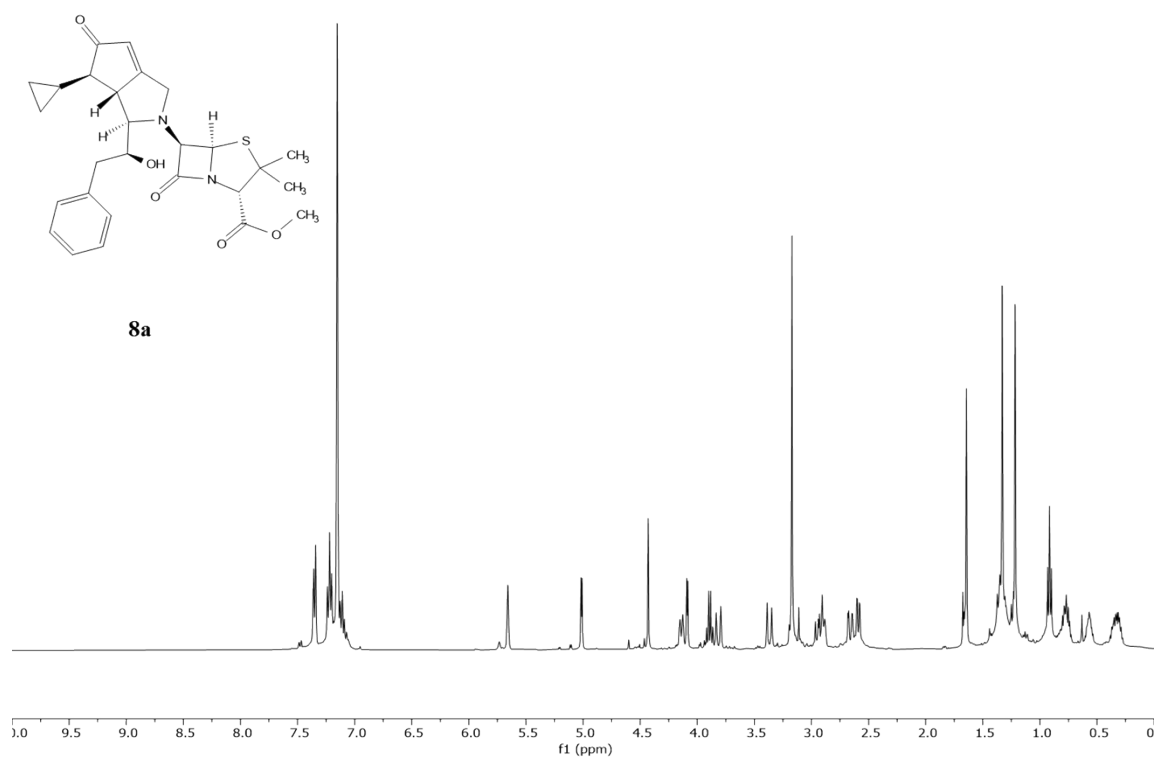

$^1\text{H}$  NMR ( $\text{CDCl}_3$ , 400 MHz)

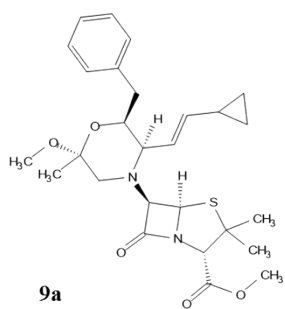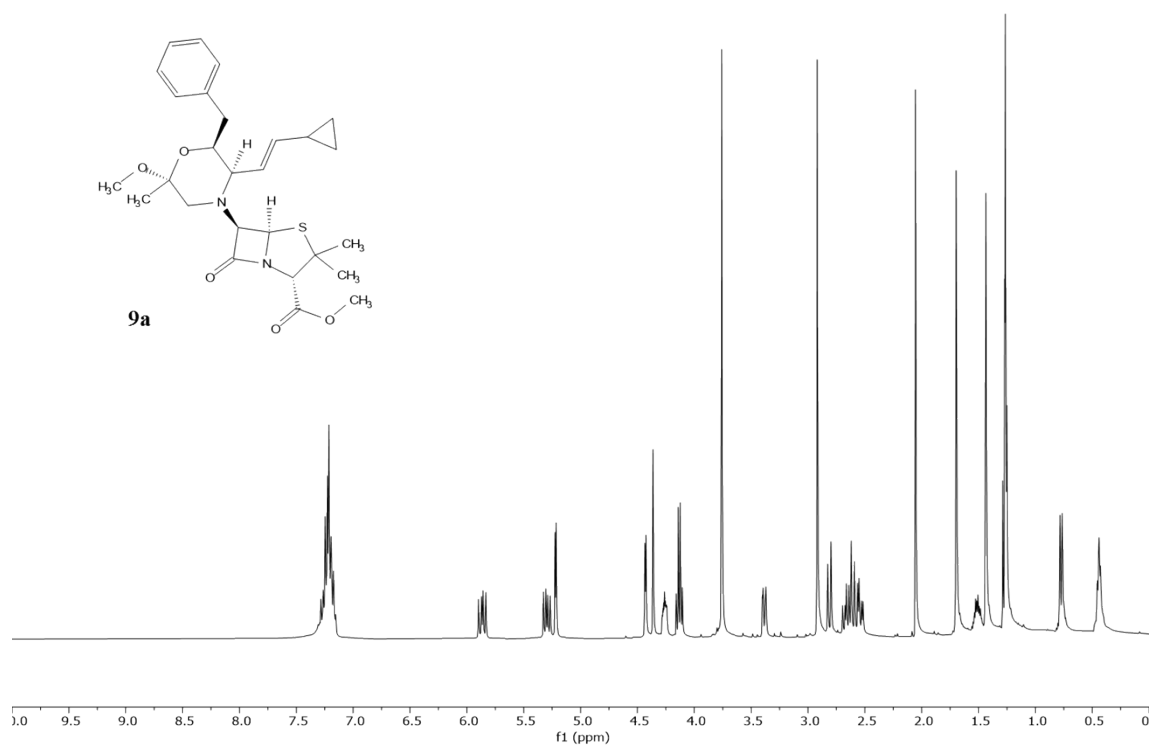

$^1\text{H}$  NMR ( $\text{CDCl}_3$ , 400 MHz)

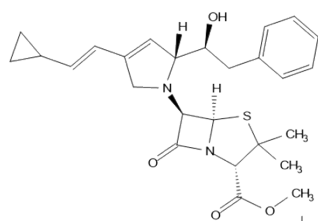

10a

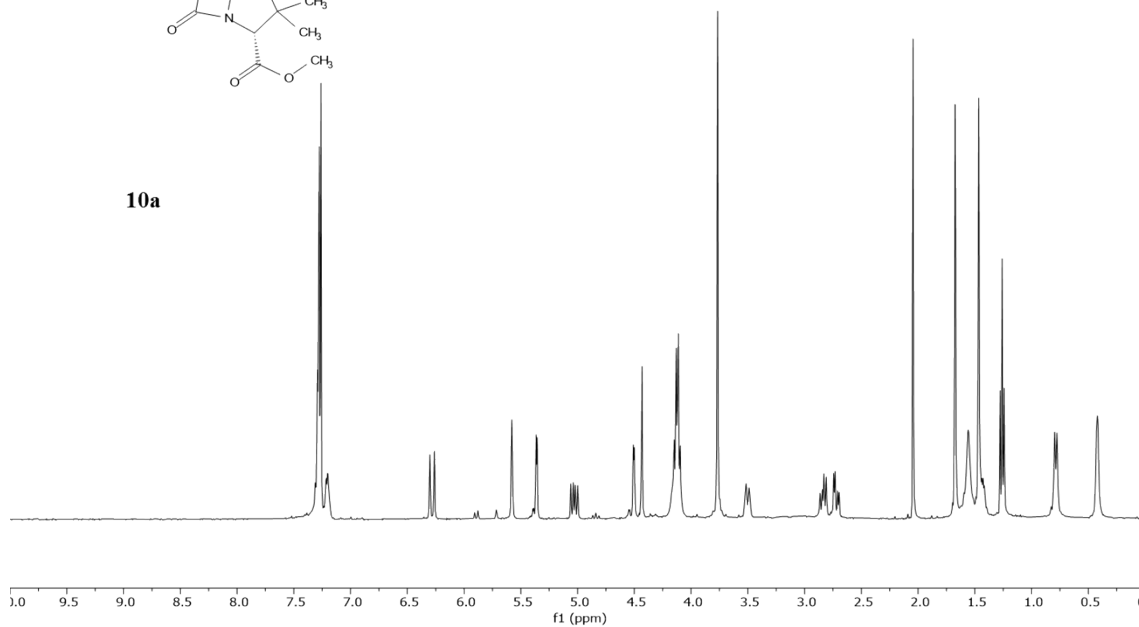

$^{13}\text{C}$  NMR ( $\text{CDCl}_3$ , 100 MHz)

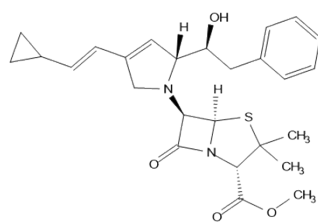

10a

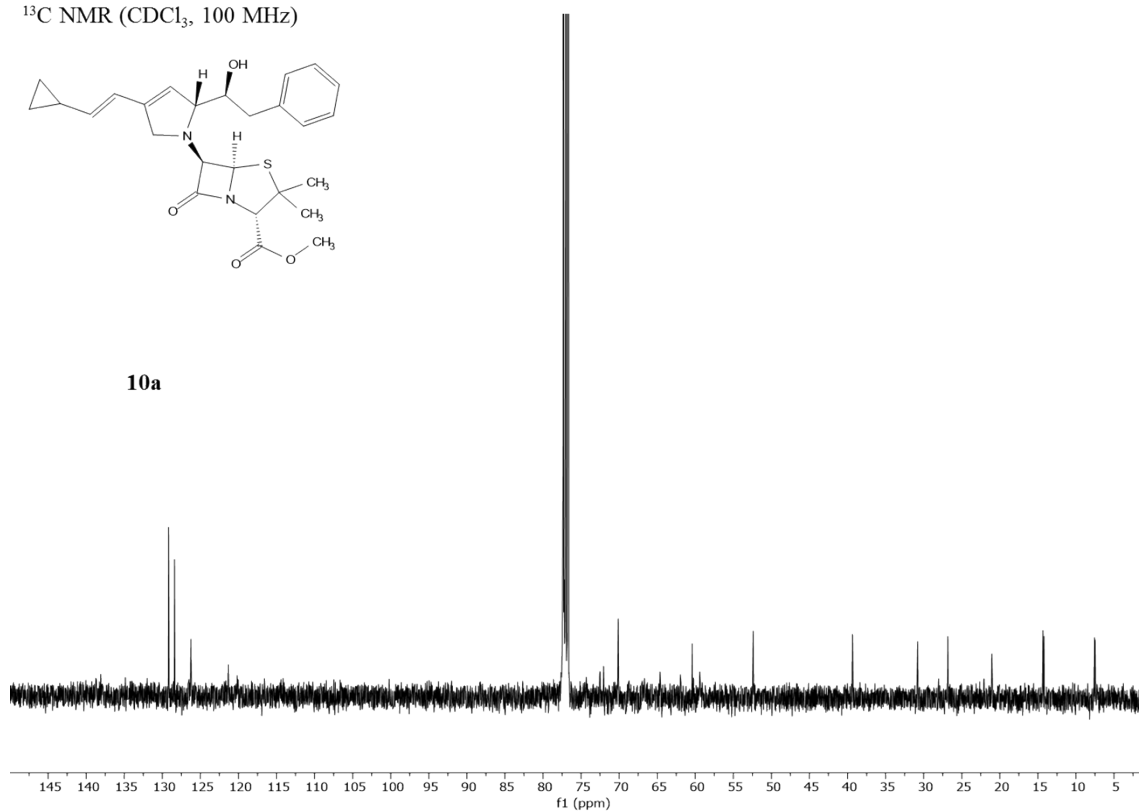

$^1\text{H}$  COSY NMR ( $\text{CDCl}_3$ , 400 MHz)

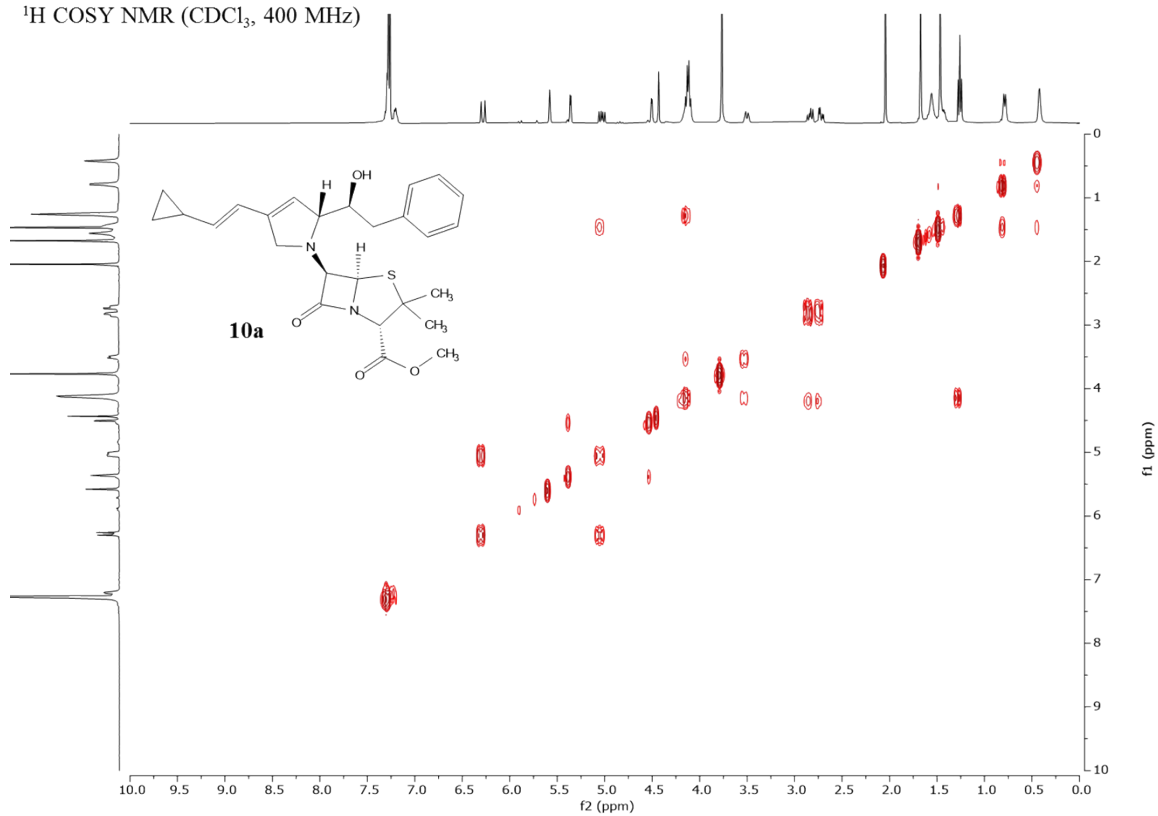

$^1\text{H}$ - $^{13}\text{C}$  HSQC NMR ( $\text{CDCl}_3$ , 400/100 MHz)

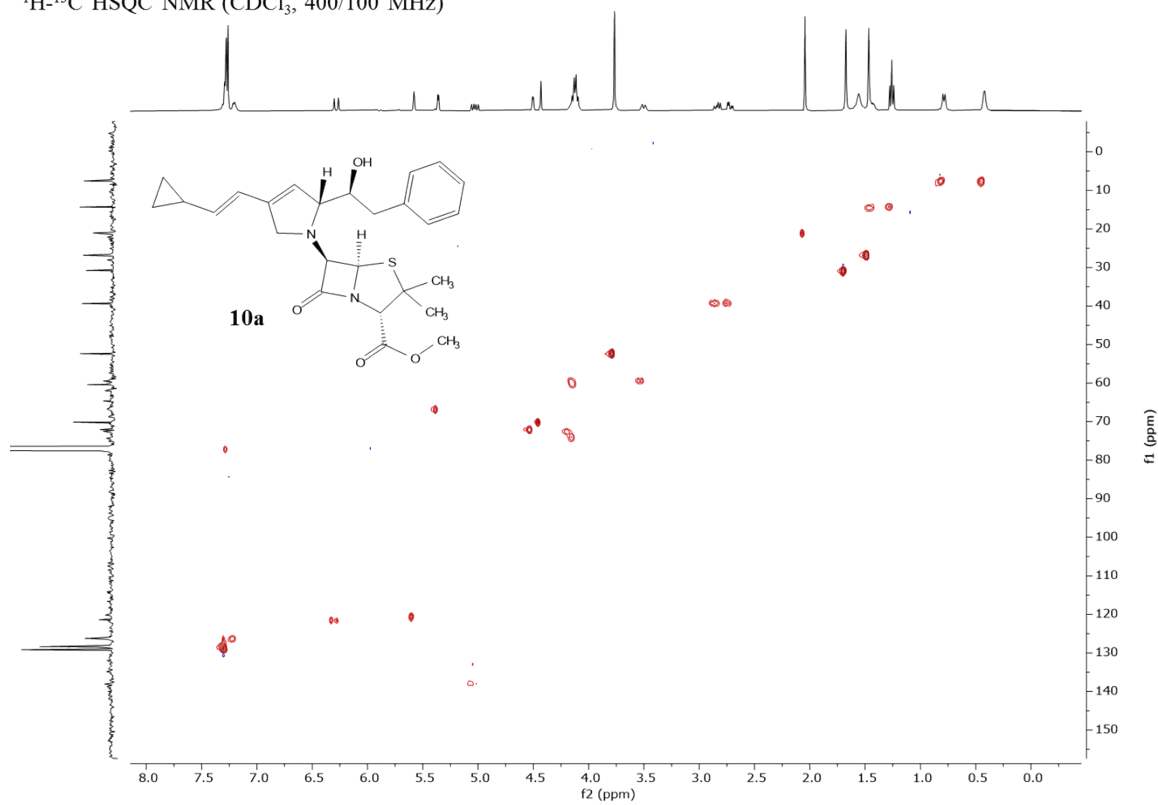

$^1\text{H}$ - $^{13}\text{C}$  HMBC NMR ( $\text{CDCl}_3$ , 400/100 MHz)

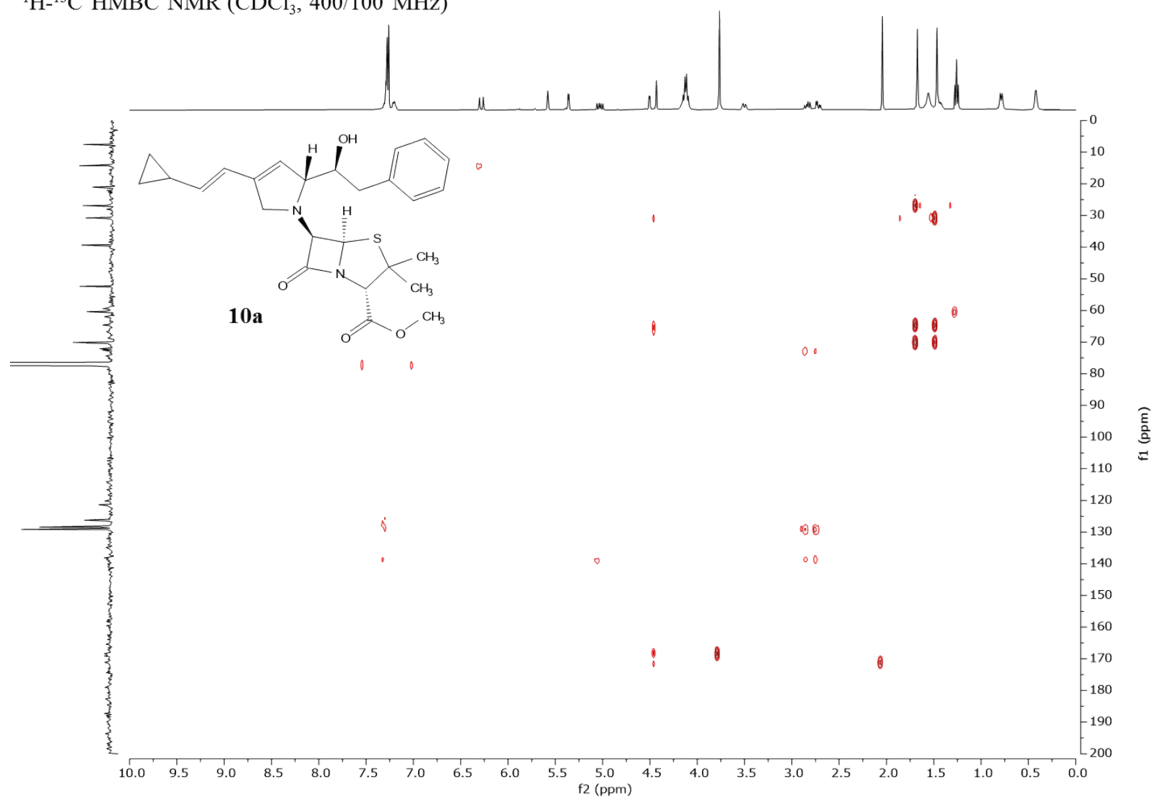

$^1\text{H}$  NMR ( $\text{CDCl}_3$ , 400 MHz)

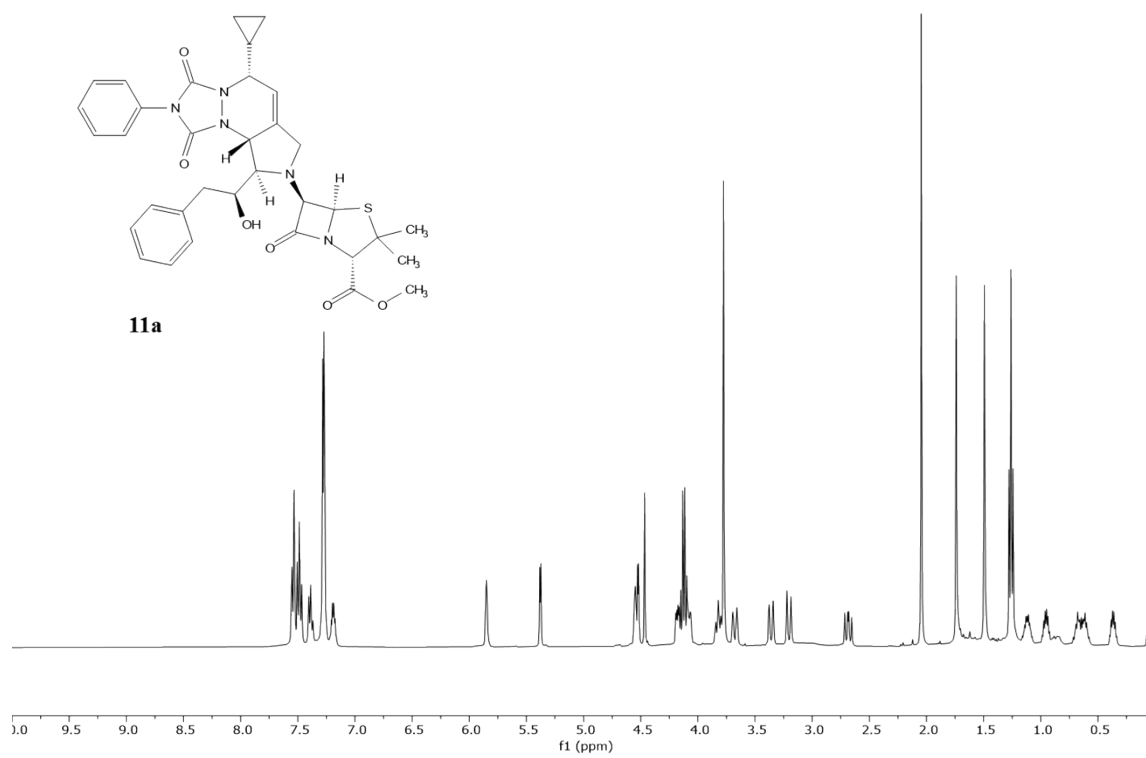



$^1\text{H}$  NMR ( $\text{CDCl}_3$ , 400 MHz)

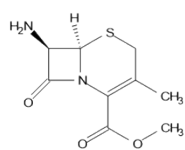

**1b**

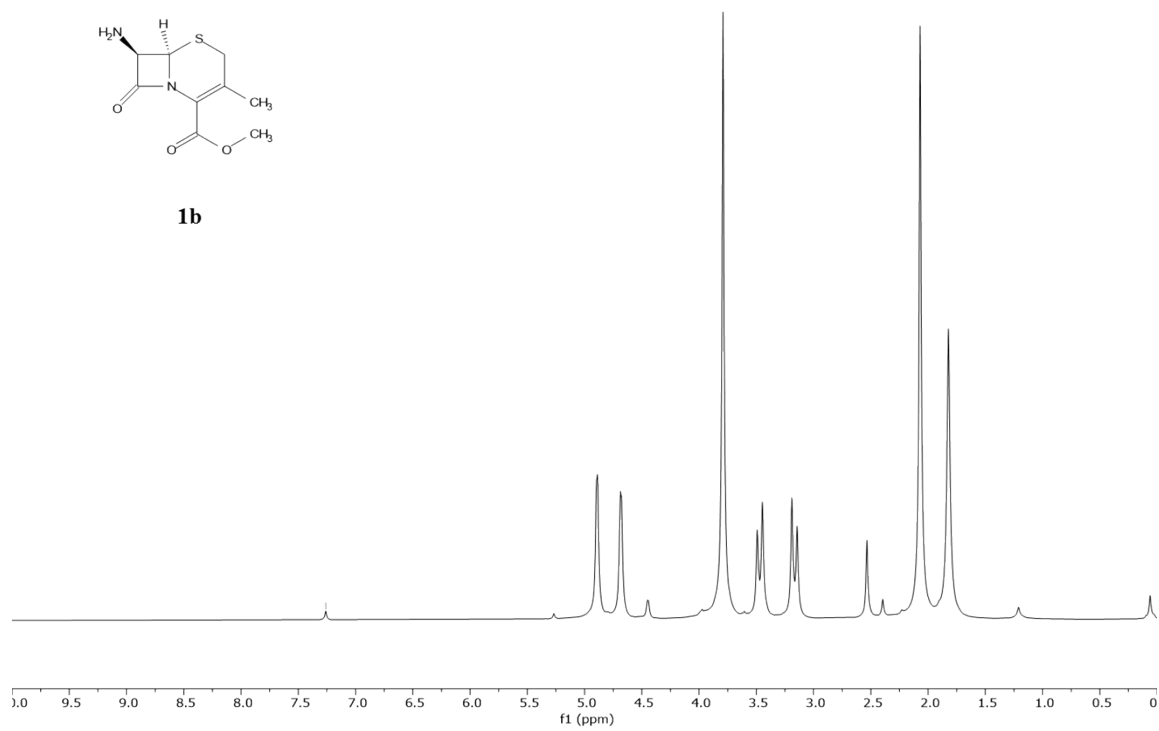

$^1\text{H}$  NMR ( $\text{CDCl}_3$ , 400 MHz)

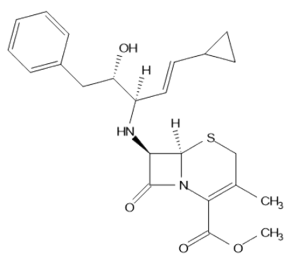

**4b**

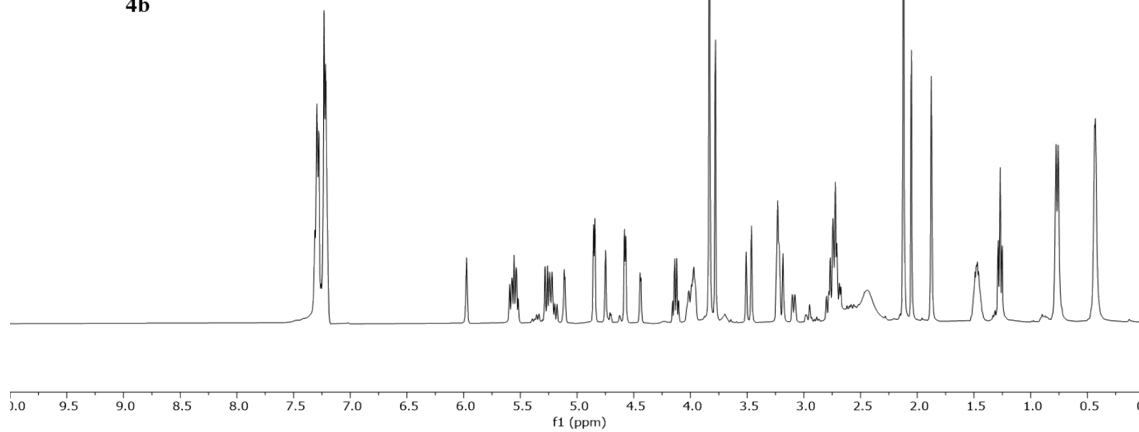

$^{13}\text{C}$  NMR ( $\text{CDCl}_3$ , 100 MHz)



**4b**

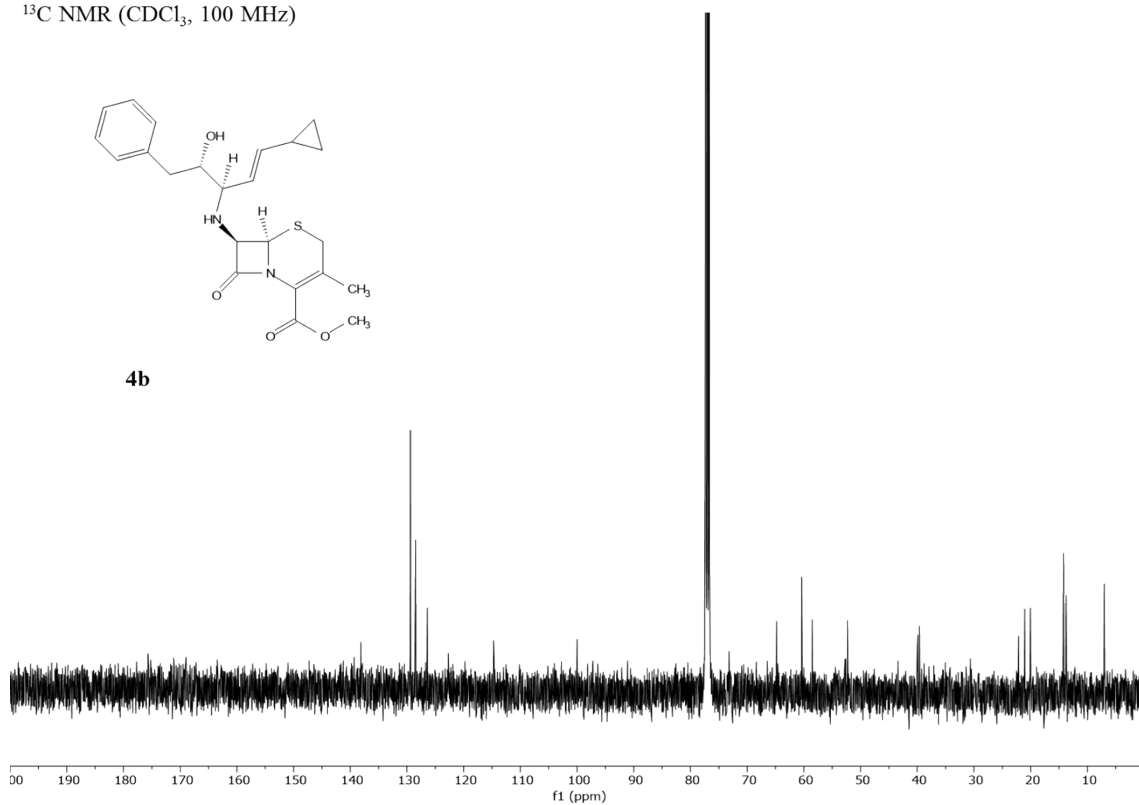

$^1\text{H}$  COSY NMR ( $\text{CDCl}_3$ , 400 MHz)

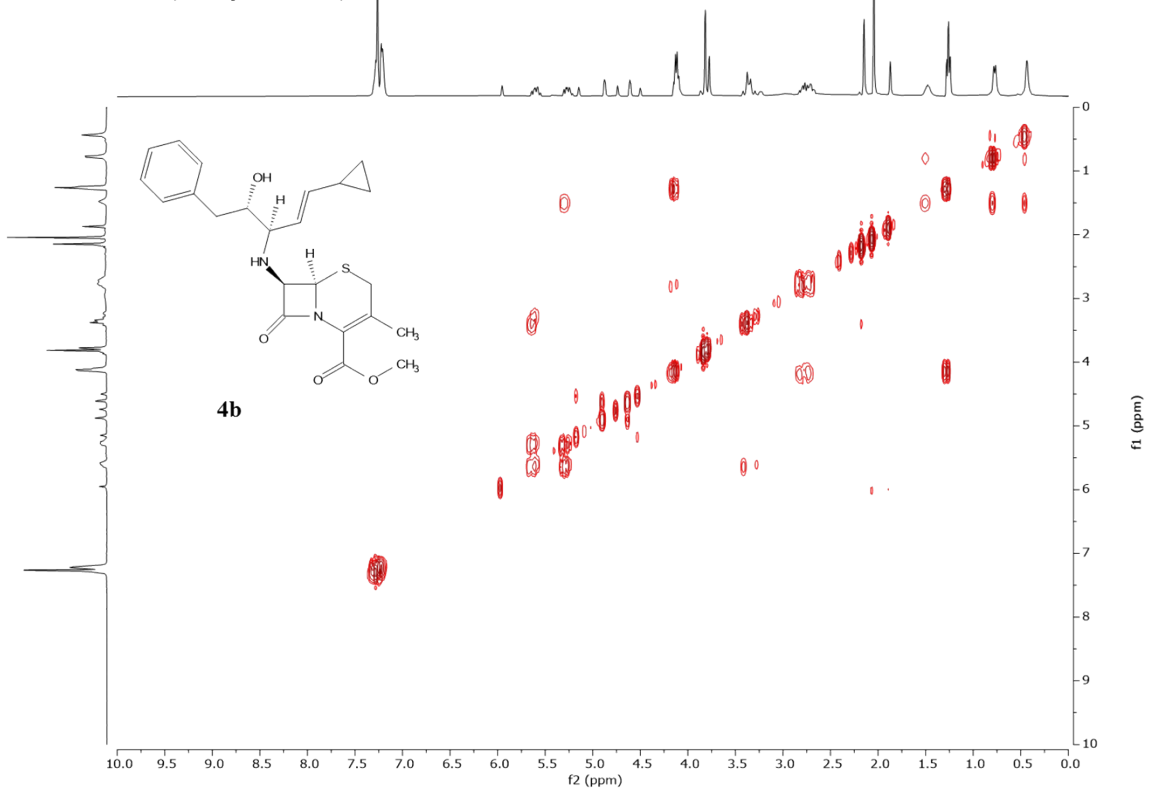

$^1\text{H}$ - $^{13}\text{C}$  HSQC NMR ( $\text{CDCl}_3$ , 400/100 MHz)

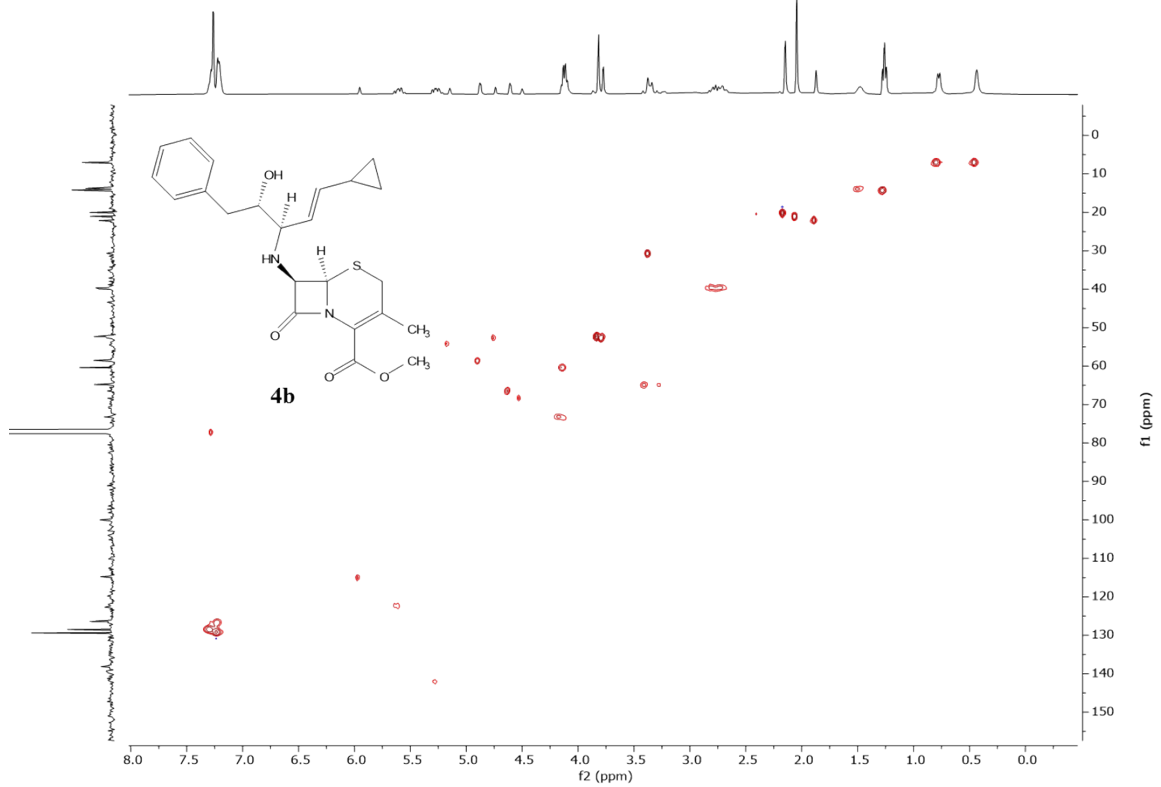

$^1\text{H}$ - $^{13}\text{C}$  HMBC NMR ( $\text{CDCl}_3$ , 400/100 MHz)

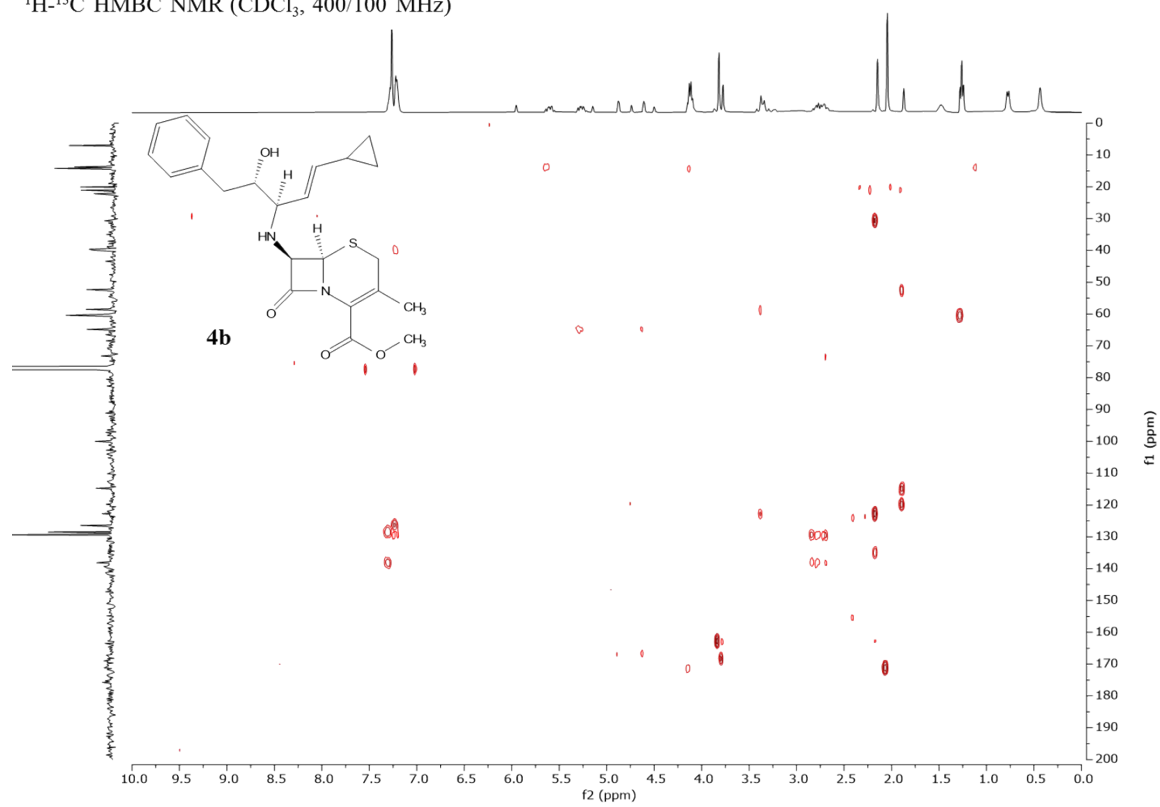

$^1\text{H}$  NMR ( $\text{CDCl}_3$ , 400 MHz)

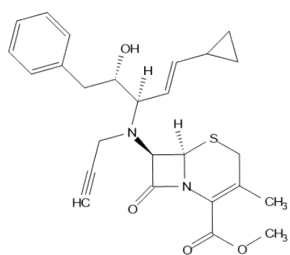

**5b**

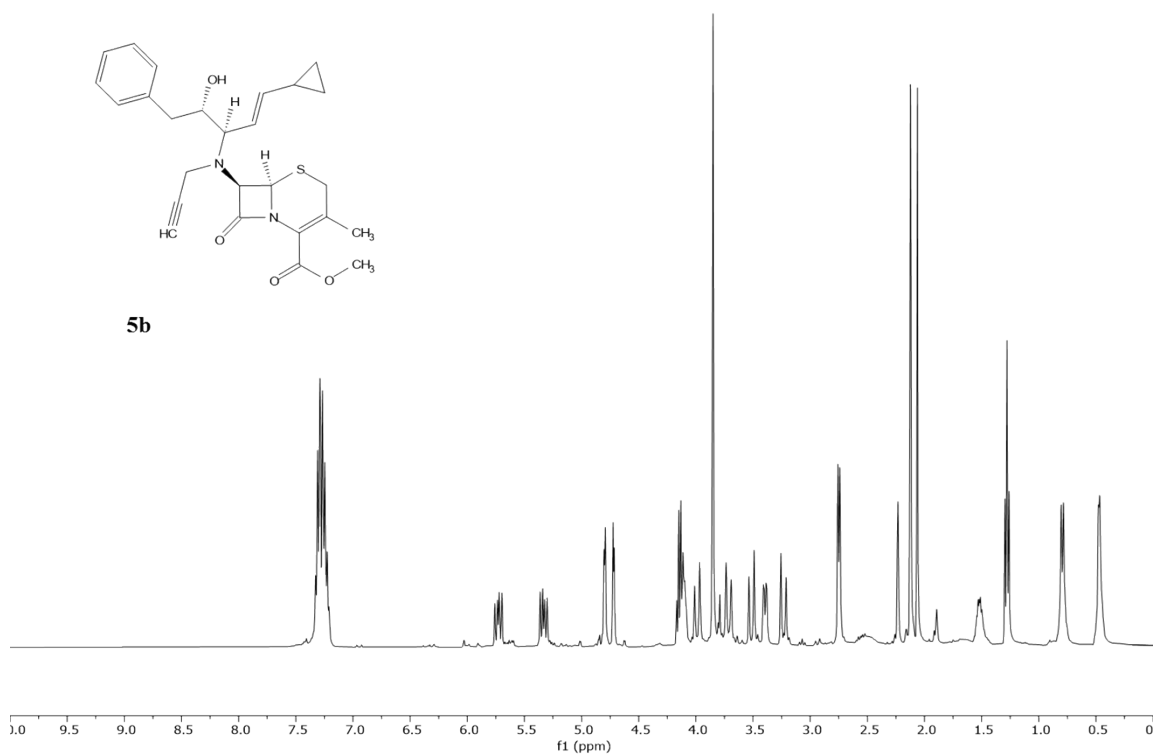

$^{13}\text{C}$  NMR ( $\text{CDCl}_3$ , 100 MHz)

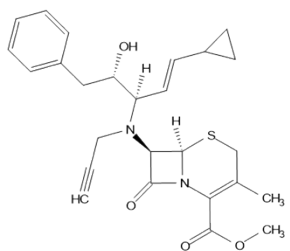

**5b**

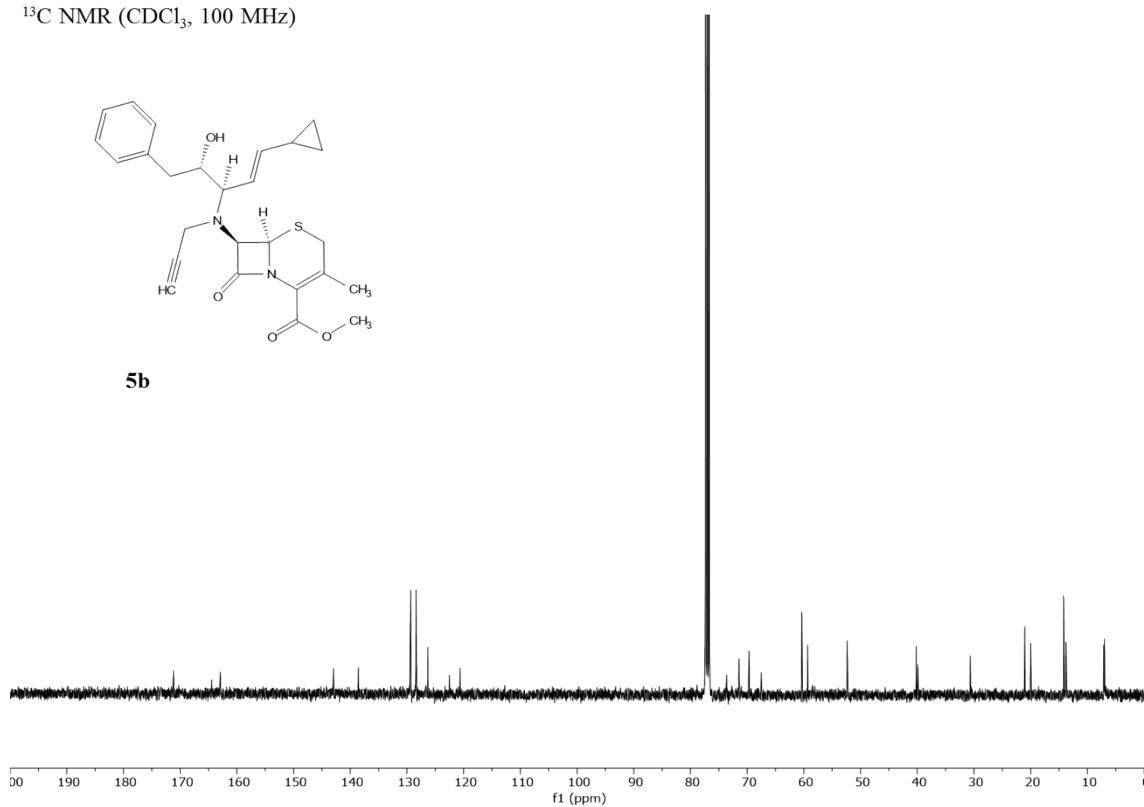

$^1\text{H}$  COSY NMR ( $\text{CDCl}_3$ , 400 MHz)

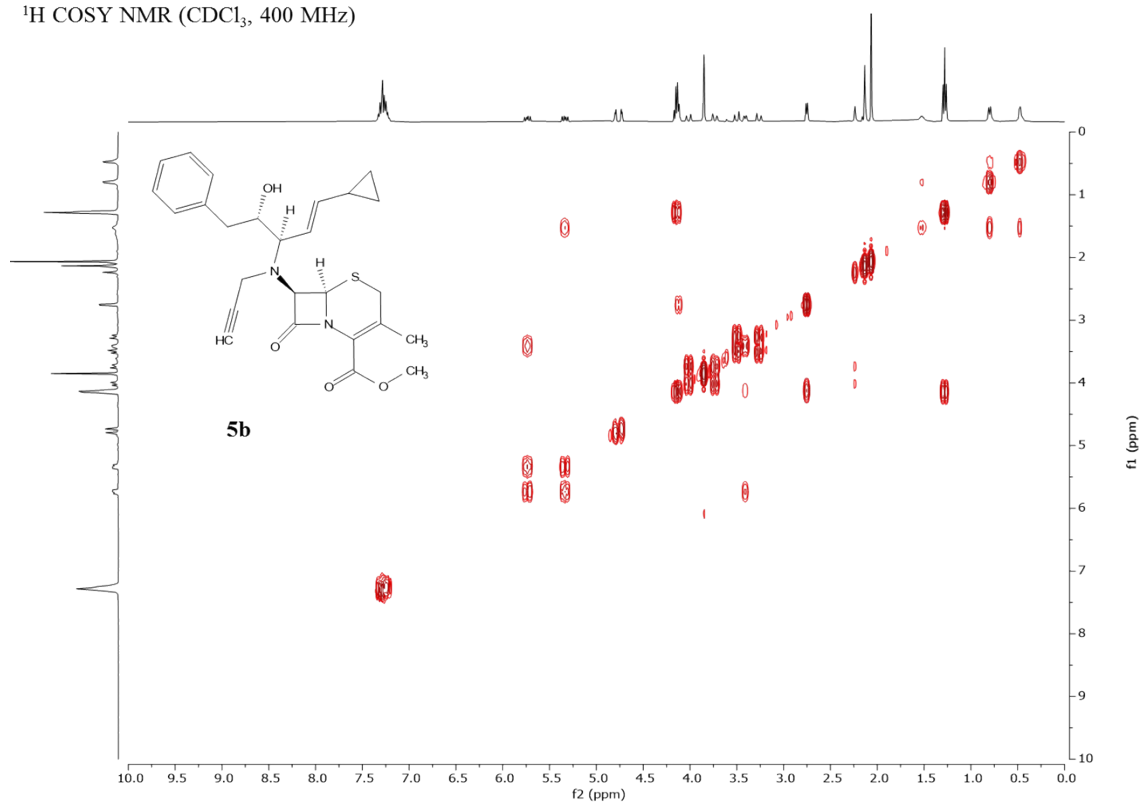

$^1\text{H}$ - $^{13}\text{C}$  HSQC NMR ( $\text{CDCl}_3$ , 400/100 MHz)

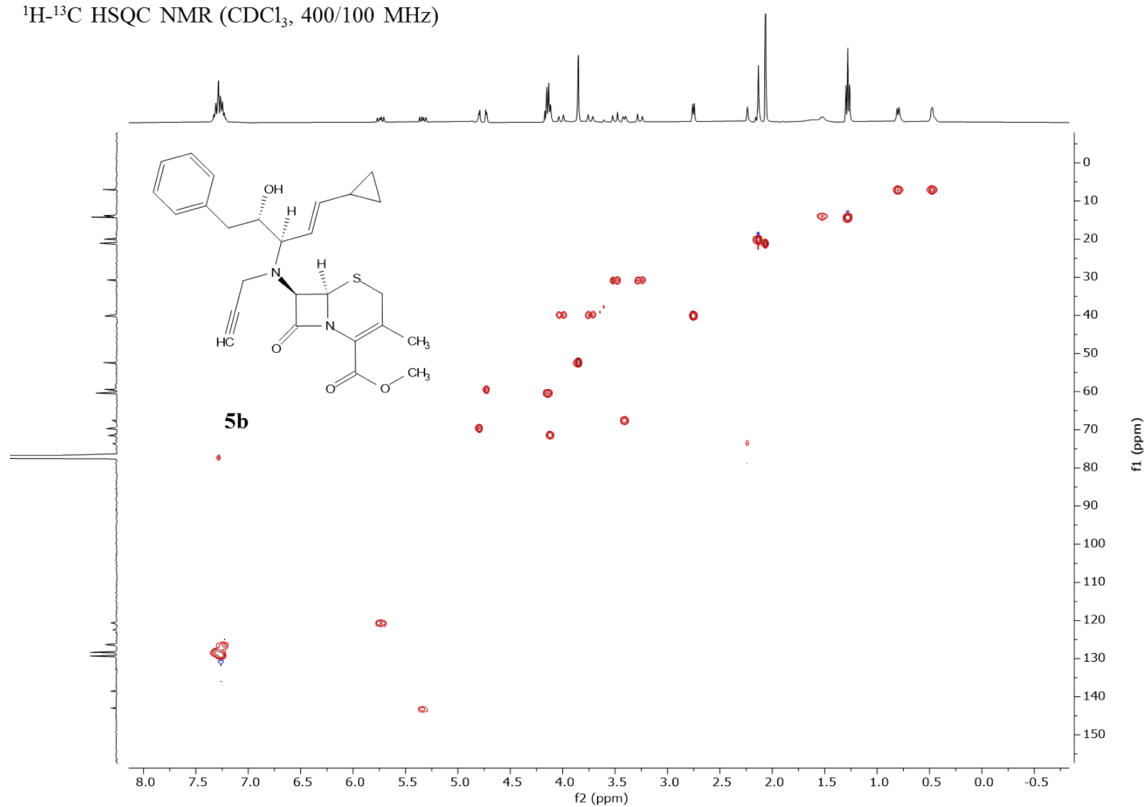

$^1\text{H}$ - $^{13}\text{C}$  HMBC NMR ( $\text{CDCl}_3$ , 400/100 MHz)

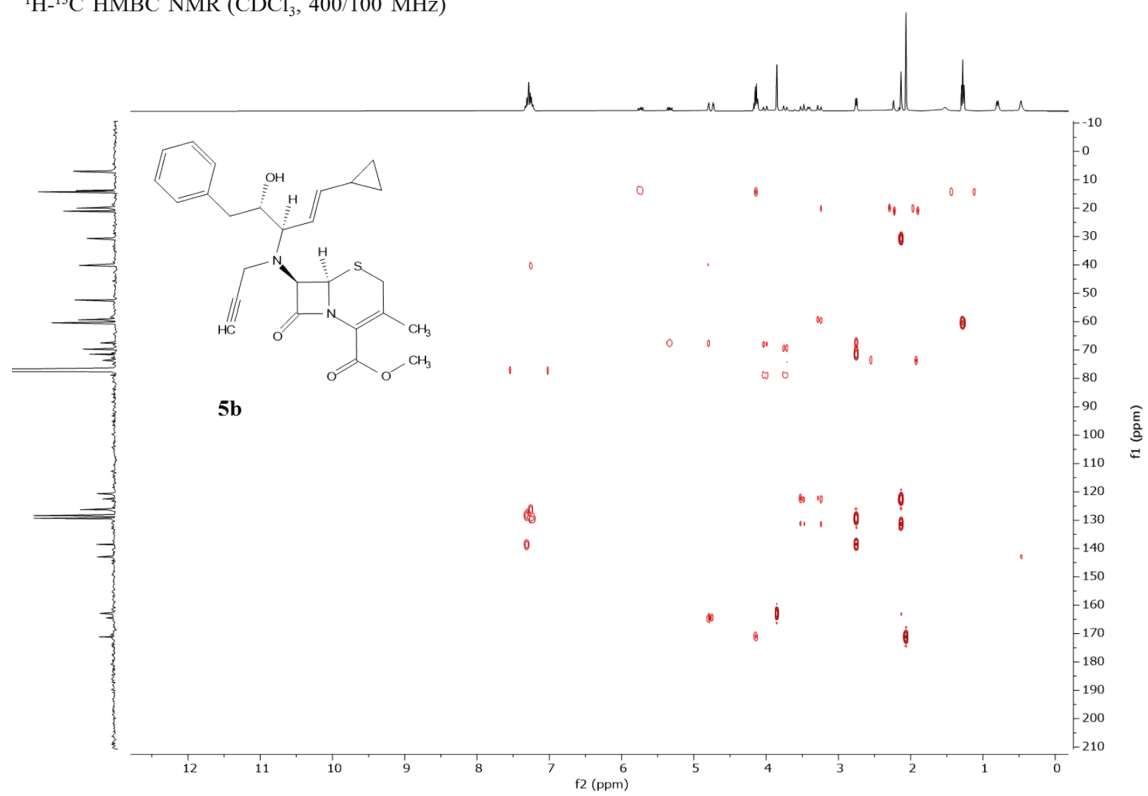

$^1\text{H}$  NMR ( $\text{C}_6\text{D}_6$ , 400 MHz)

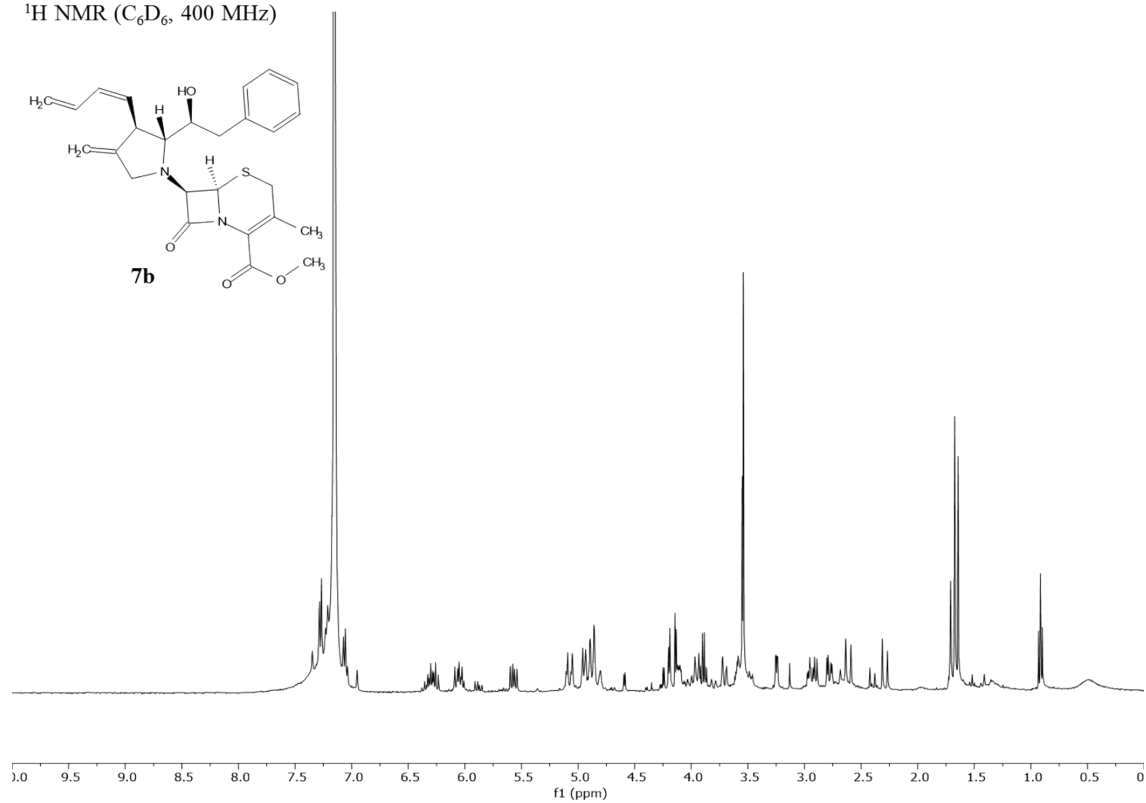

$^{13}\text{C}$  NMR ( $\text{C}_6\text{D}_6$ , 100 MHz)

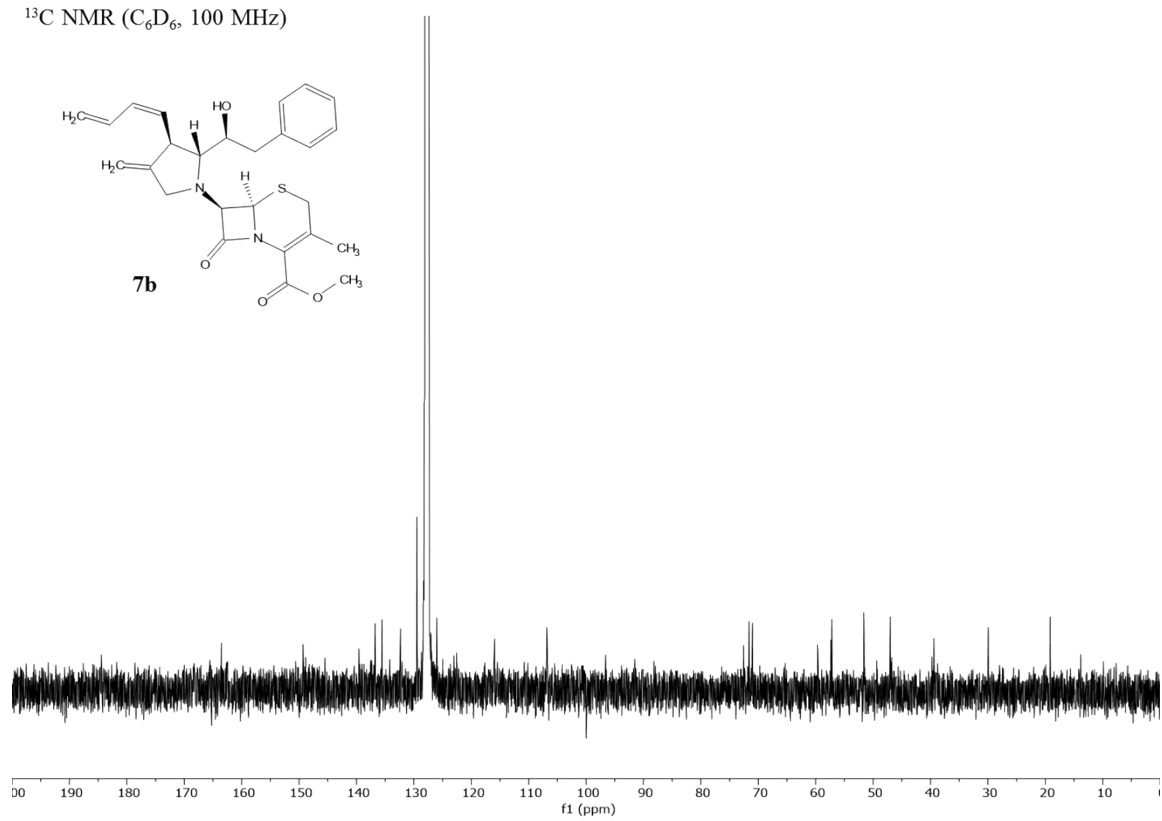



$^1\text{H}$  COSY NMR ( $\text{CDCl}_3$ , 400 MHz)

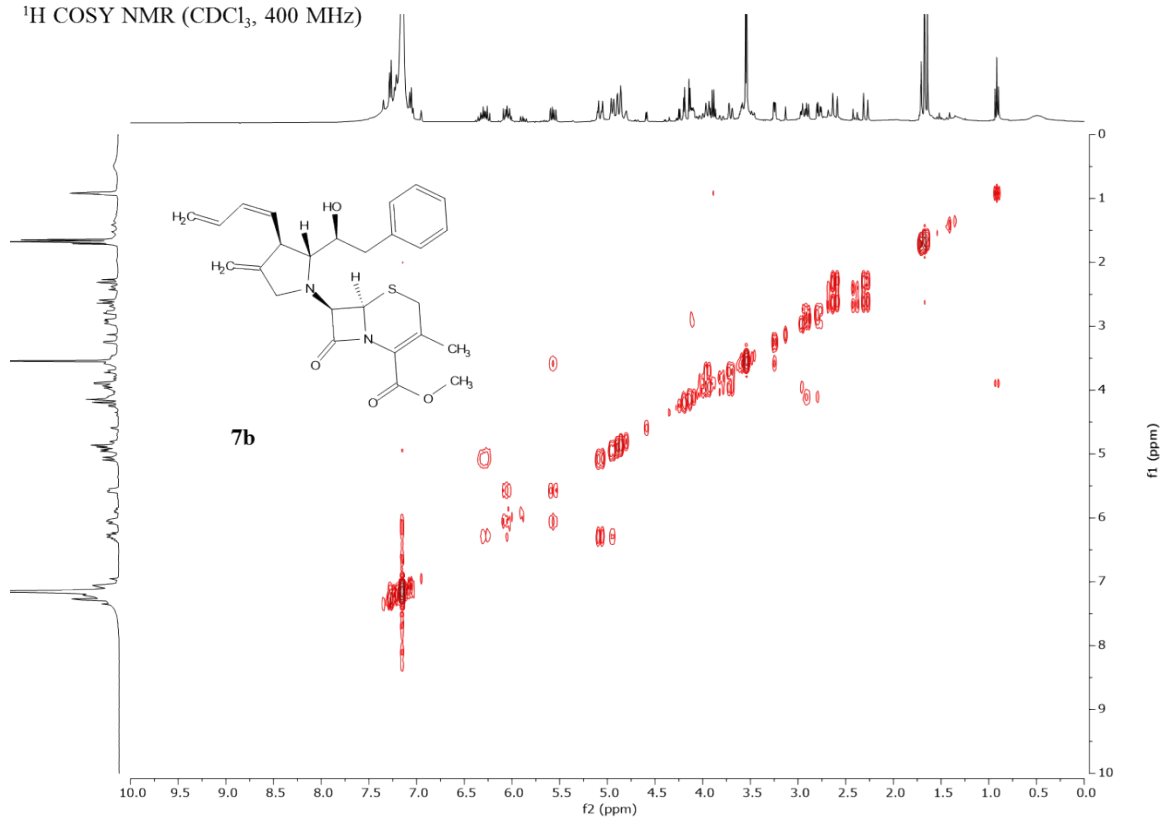

$^1\text{H}$ - $^{13}\text{C}$  HSQC NMR ( $\text{CDCl}_3$ , 400/100 MHz)

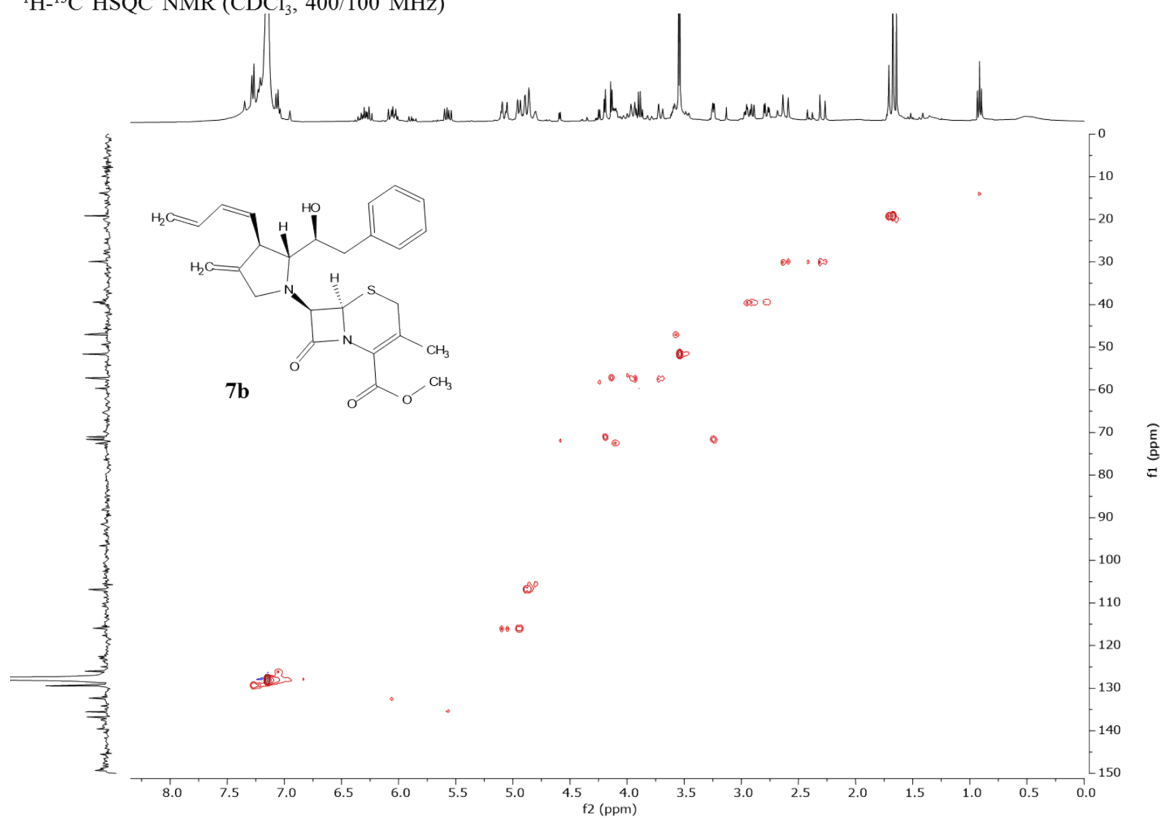

$^1\text{H}$ - $^{13}\text{C}$  HMBC NMR ( $\text{CDCl}_3$ , 400/100 MHz)

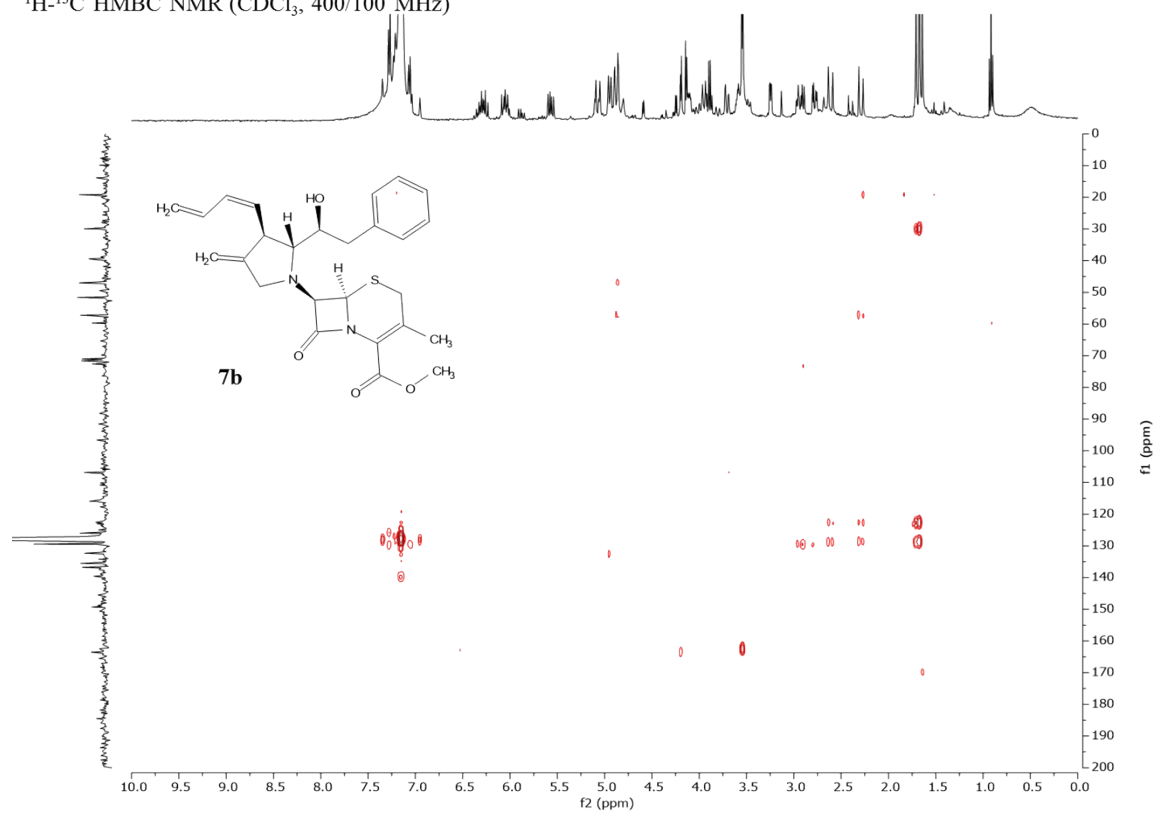

$^1\text{H}$  NMR ( $\text{C}_6\text{D}_6$ , 400 MHz)

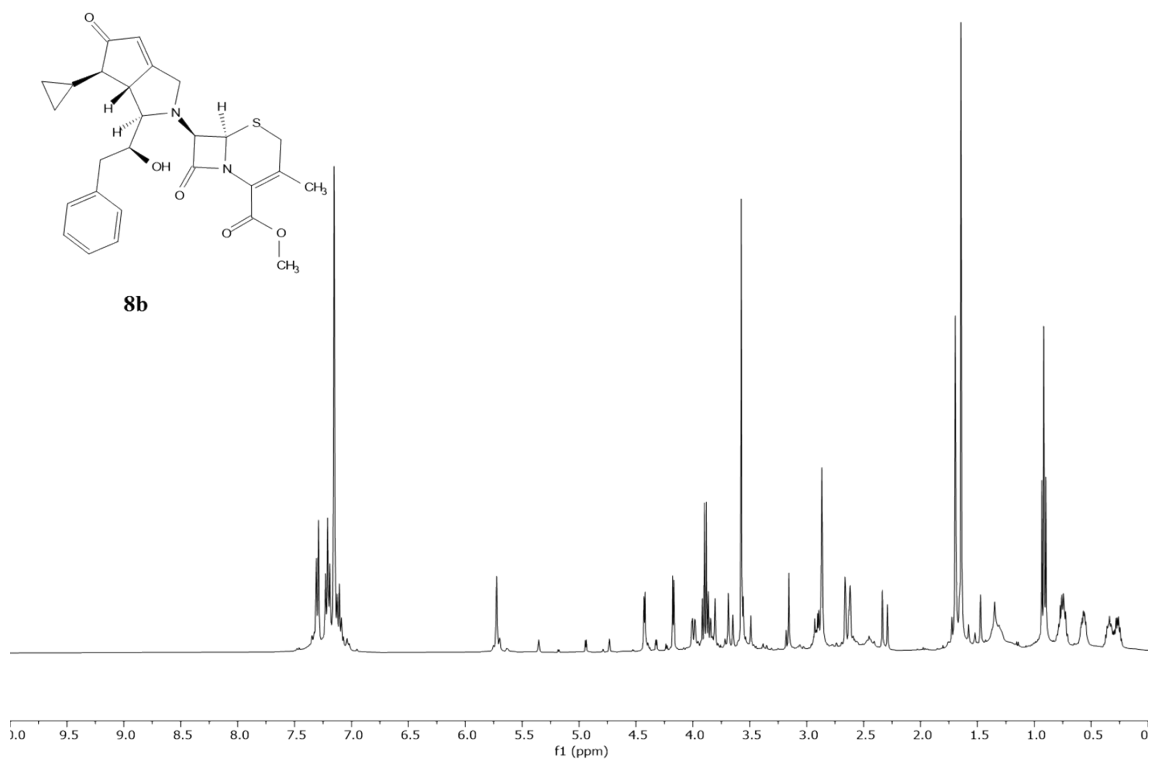

$^{13}\text{C}$  NMR ( $\text{C}_6\text{D}_6$ , 100 MHz)

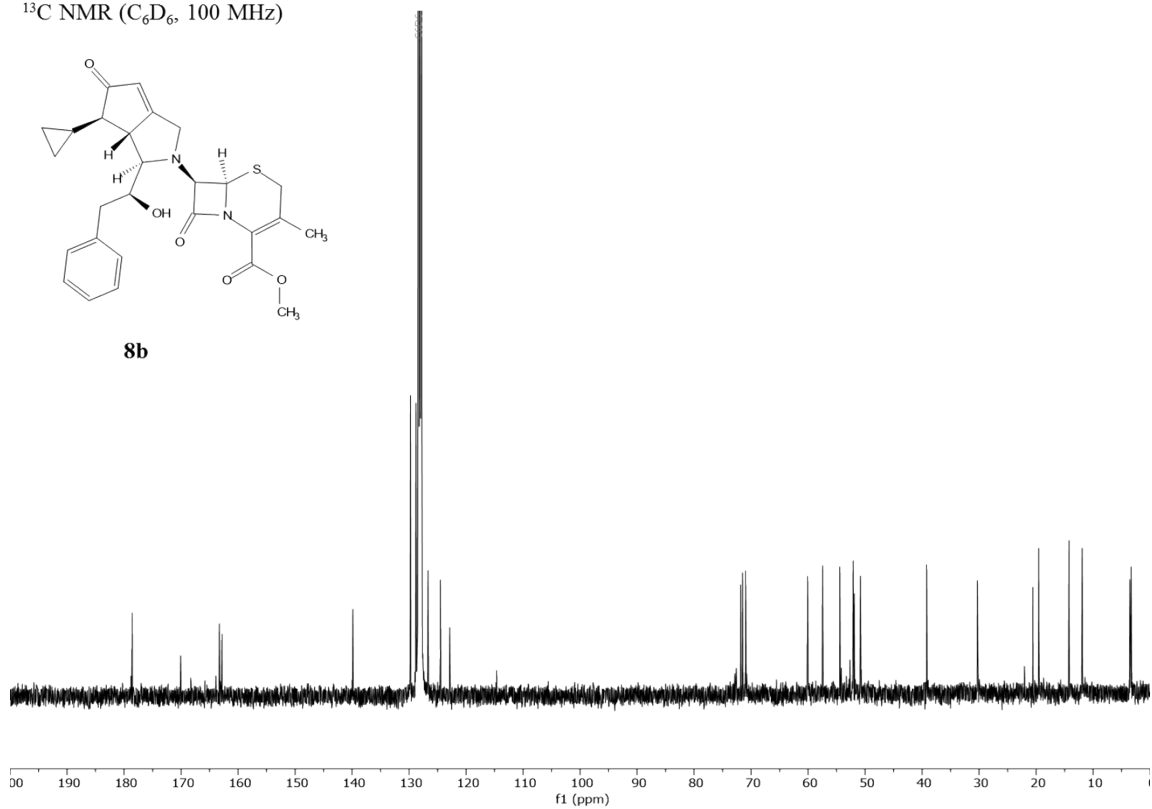

$^1\text{H}$  COSY NMR ( $\text{C}_6\text{D}_6$ , 400 MHz)

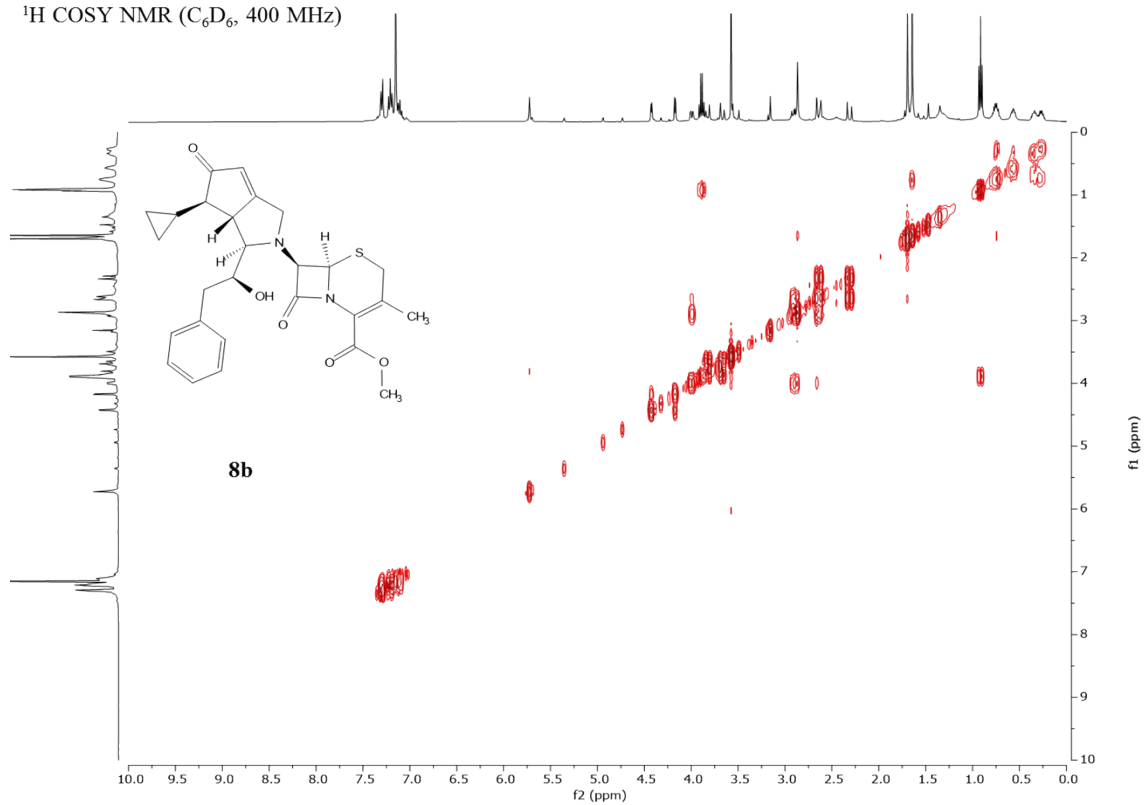

$^1\text{H}$ - $^{13}\text{C}$  HSQC NMR ( $\text{C}_6\text{D}_6$ , 400/100 MHz)

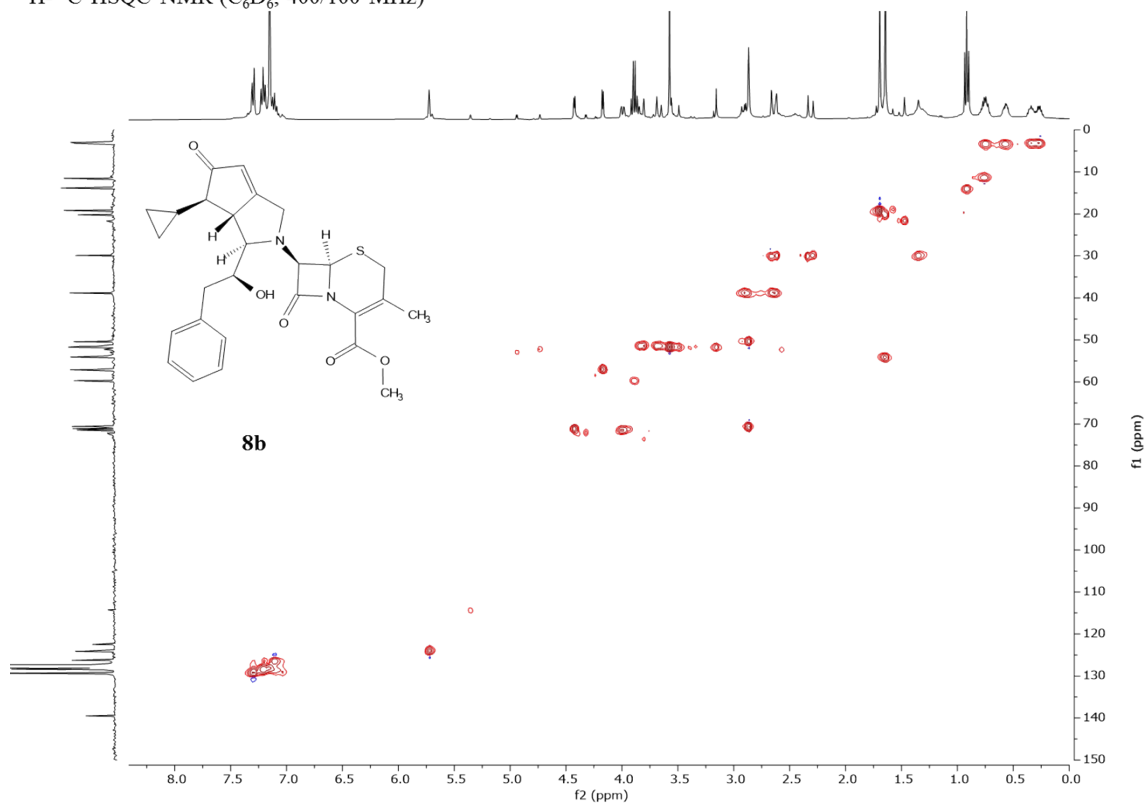

$^1\text{H}$ - $^{13}\text{C}$  HMBC NMR ( $\text{C}_6\text{D}_6$ , 400/100 MHz)

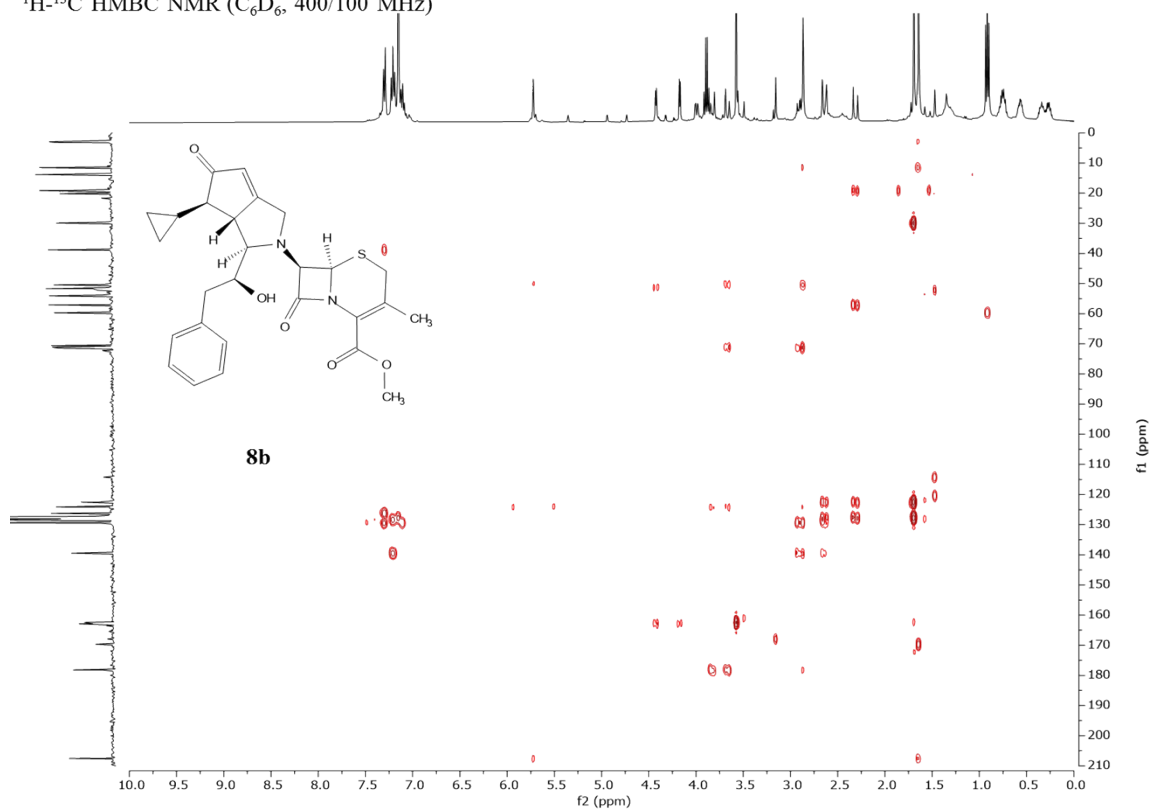

$^1\text{H}$  NMR ( $\text{CDCl}_3$ , 400 MHz)

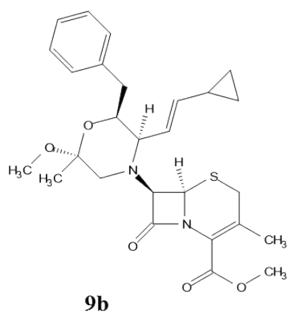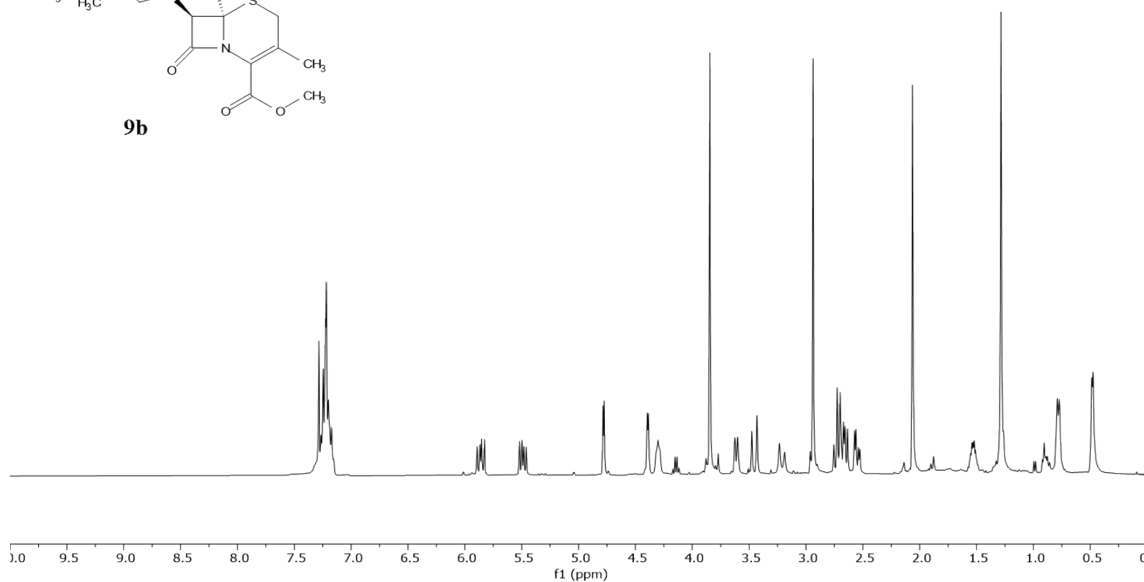

$^1\text{H}$  COSY NMR ( $\text{CDCl}_3$ , 400 MHz)

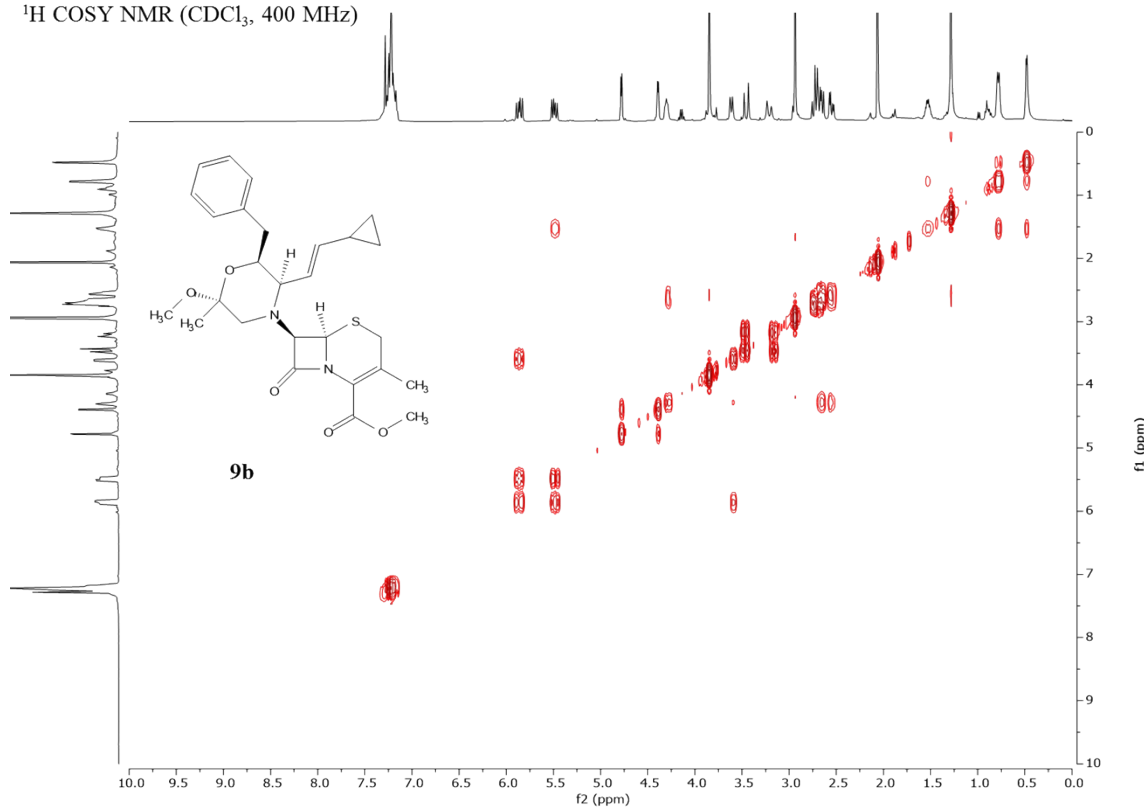

$^1\text{H}$ - $^{13}\text{C}$  HSQC NMR ( $\text{CDCl}_3$ , 400/100 MHz)

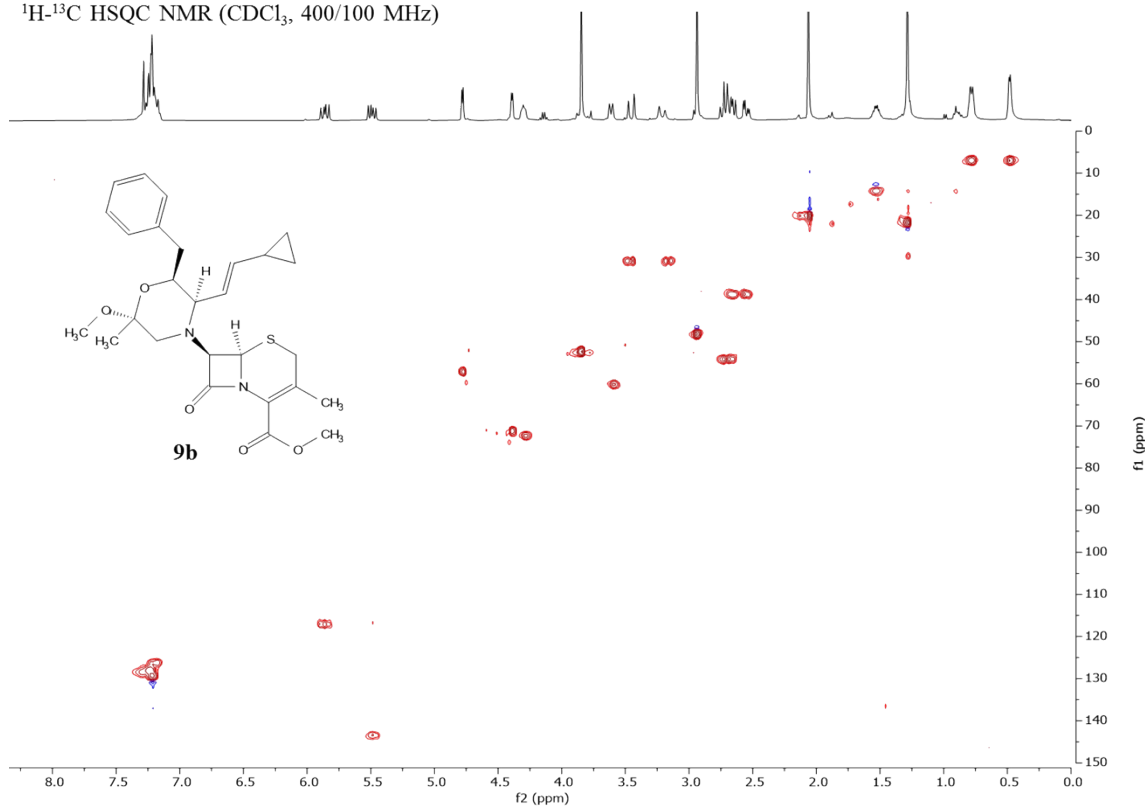

$^1\text{H}$ - $^{13}\text{C}$  HMBC NMR ( $\text{CDCl}_3$ , 400/100 MHz)

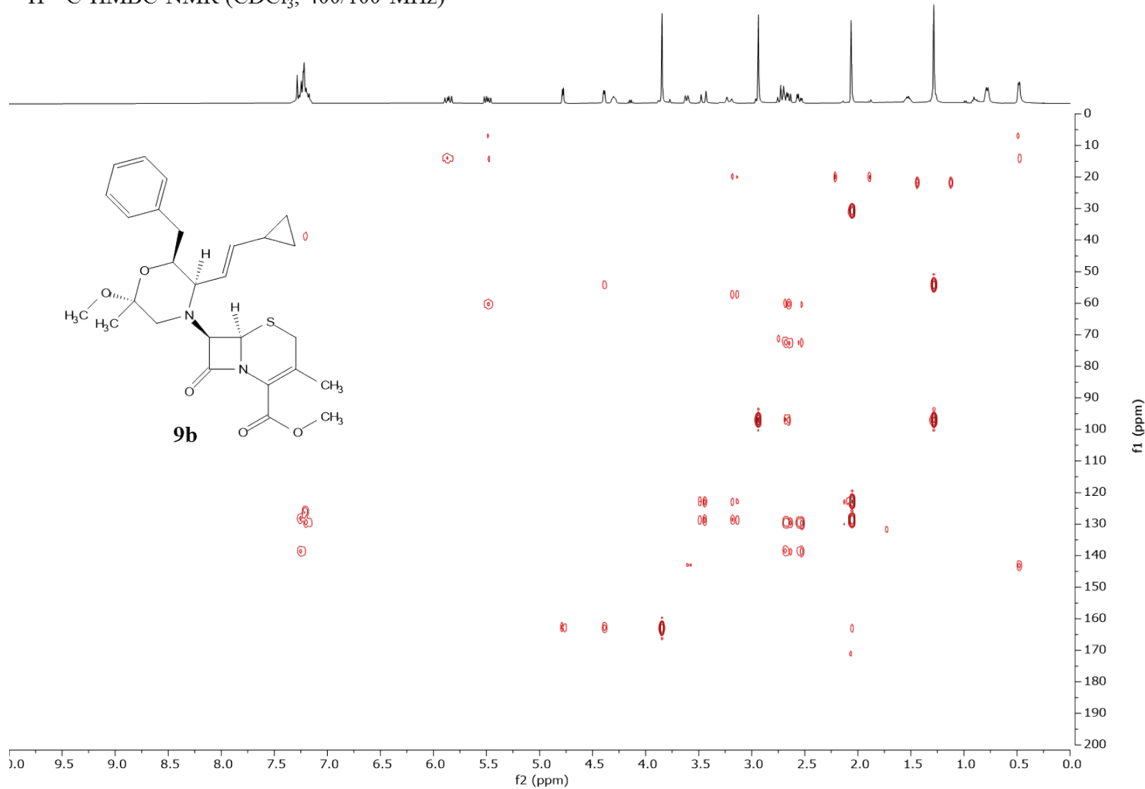

$^1\text{H}$  NMR ( $\text{CDCl}_3$ , 400 MHz)

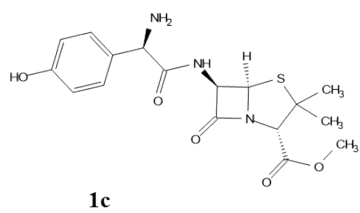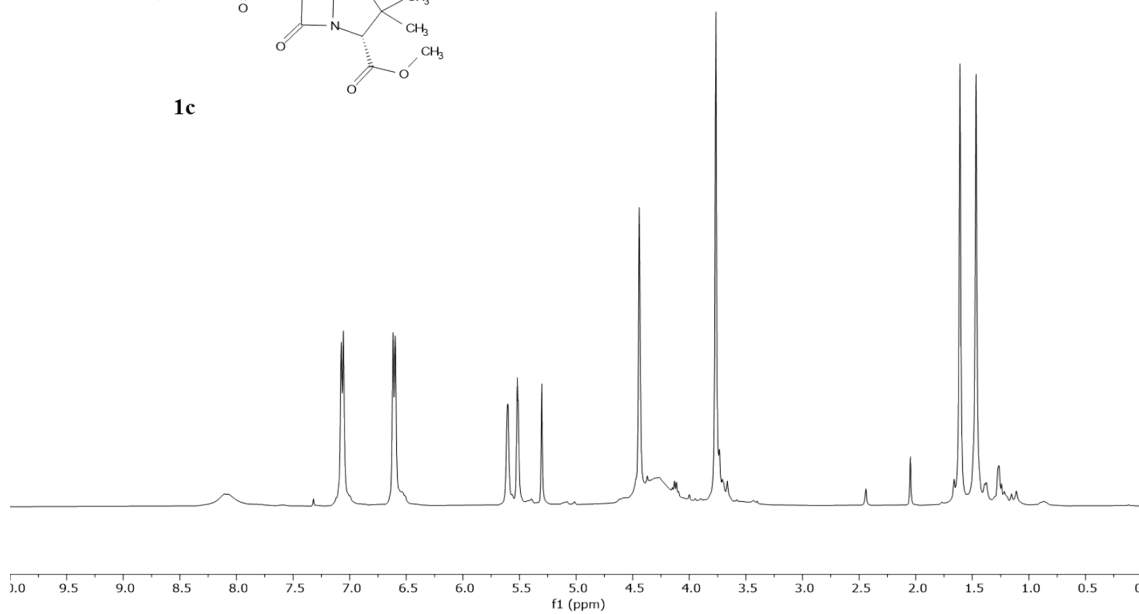



$^1\text{H}$  NMR ( $\text{CDCl}_3$ , 400 MHz)

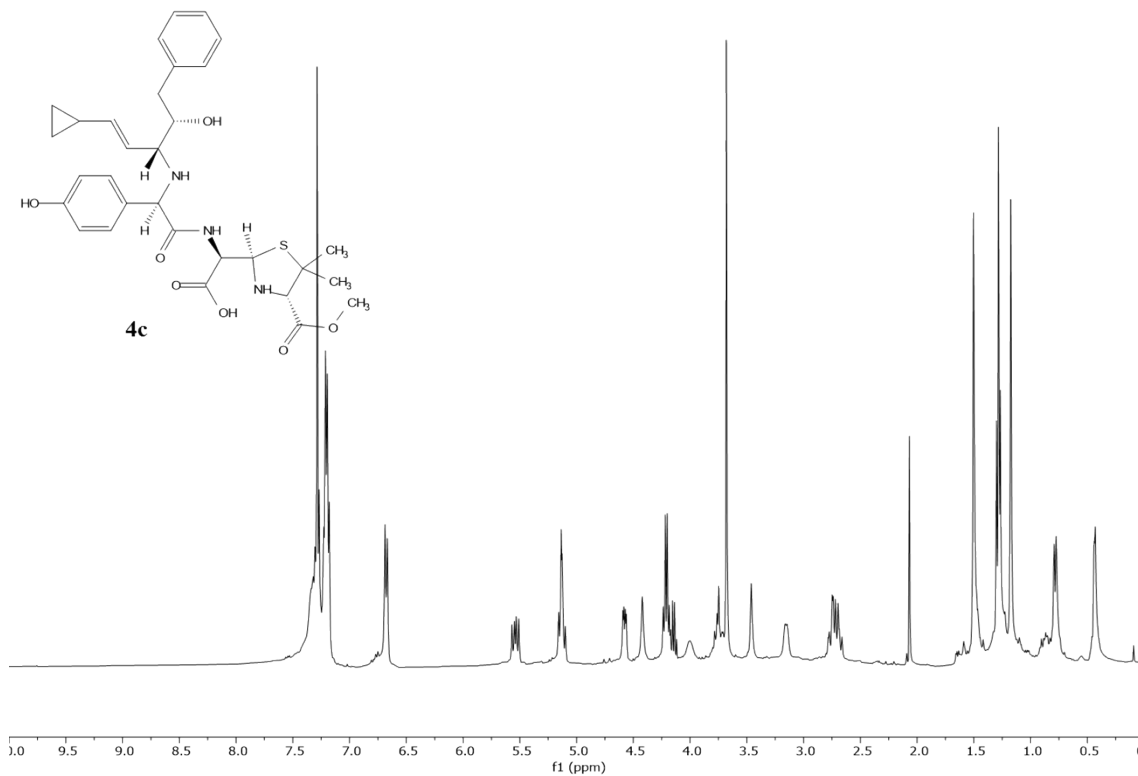

$^{13}\text{C}$  NMR ( $\text{CDCl}_3$ , 100 MHz)

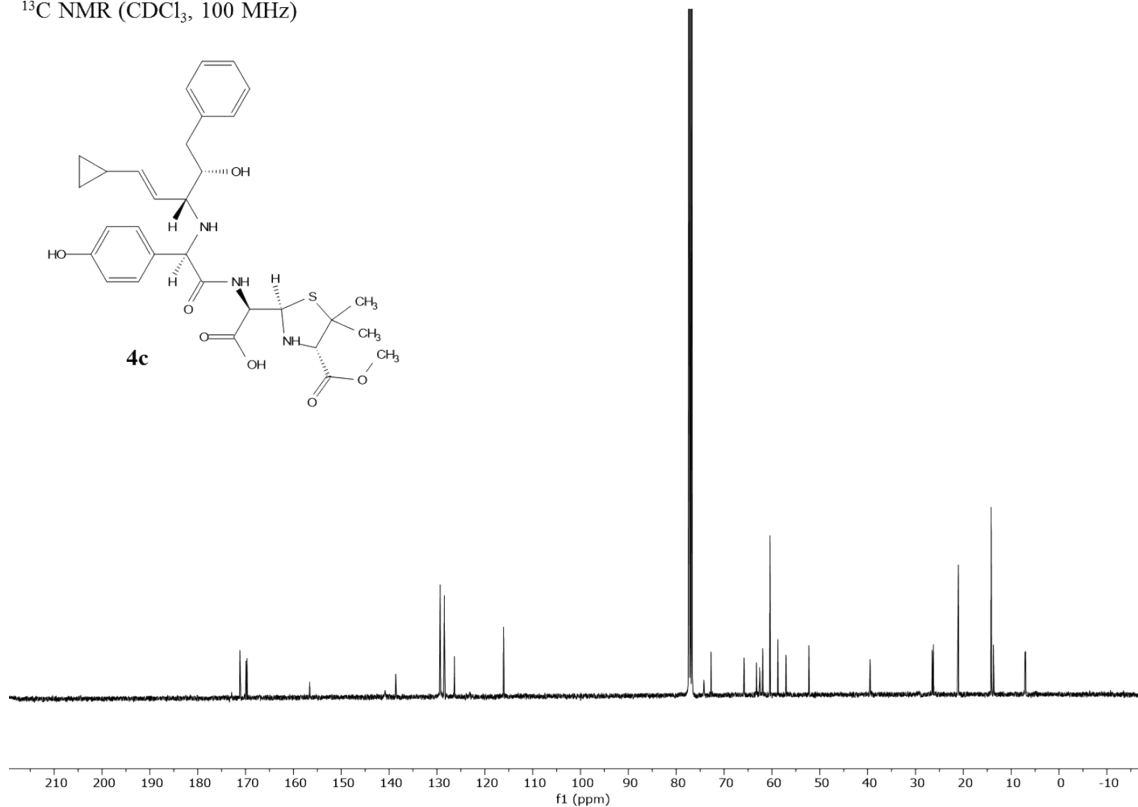

$^1\text{H}$  COSY NMR ( $\text{CDCl}_3$ , 400 MHz)

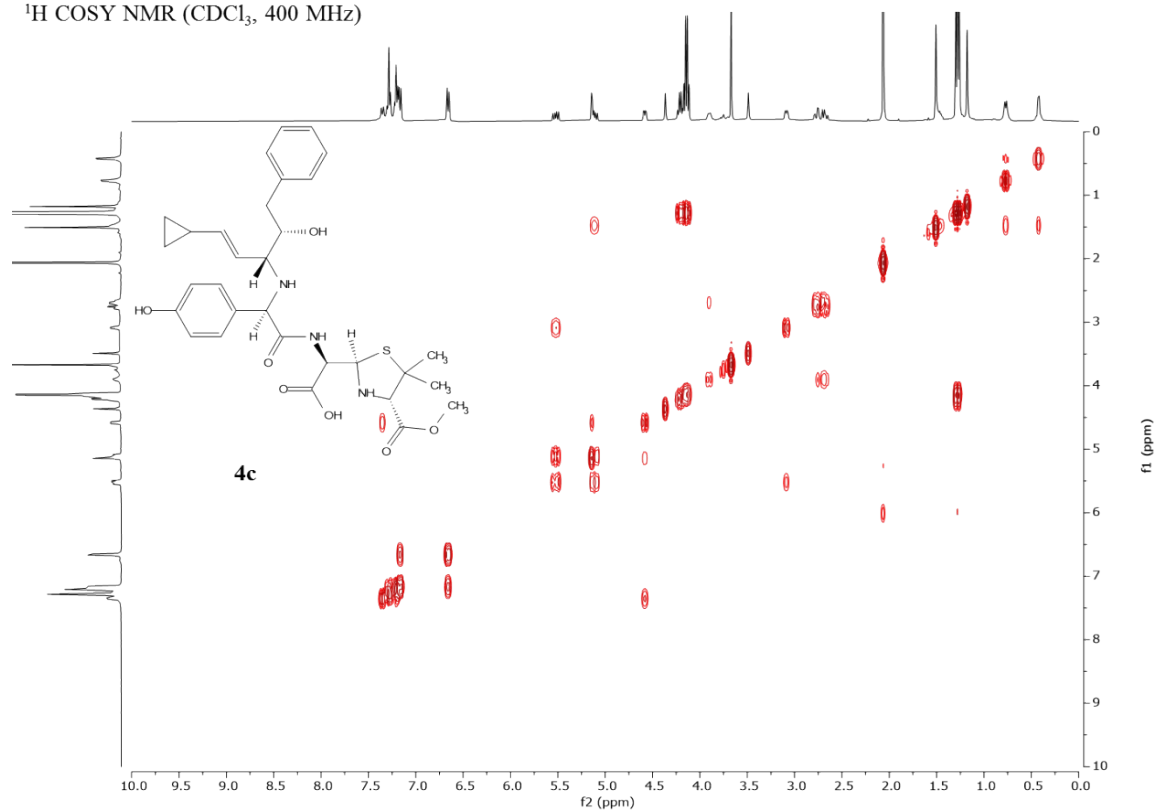

$^1\text{H}$ - $^{13}\text{C}$  HSQC NMR ( $\text{CDCl}_3$ , 400/100 MHz)

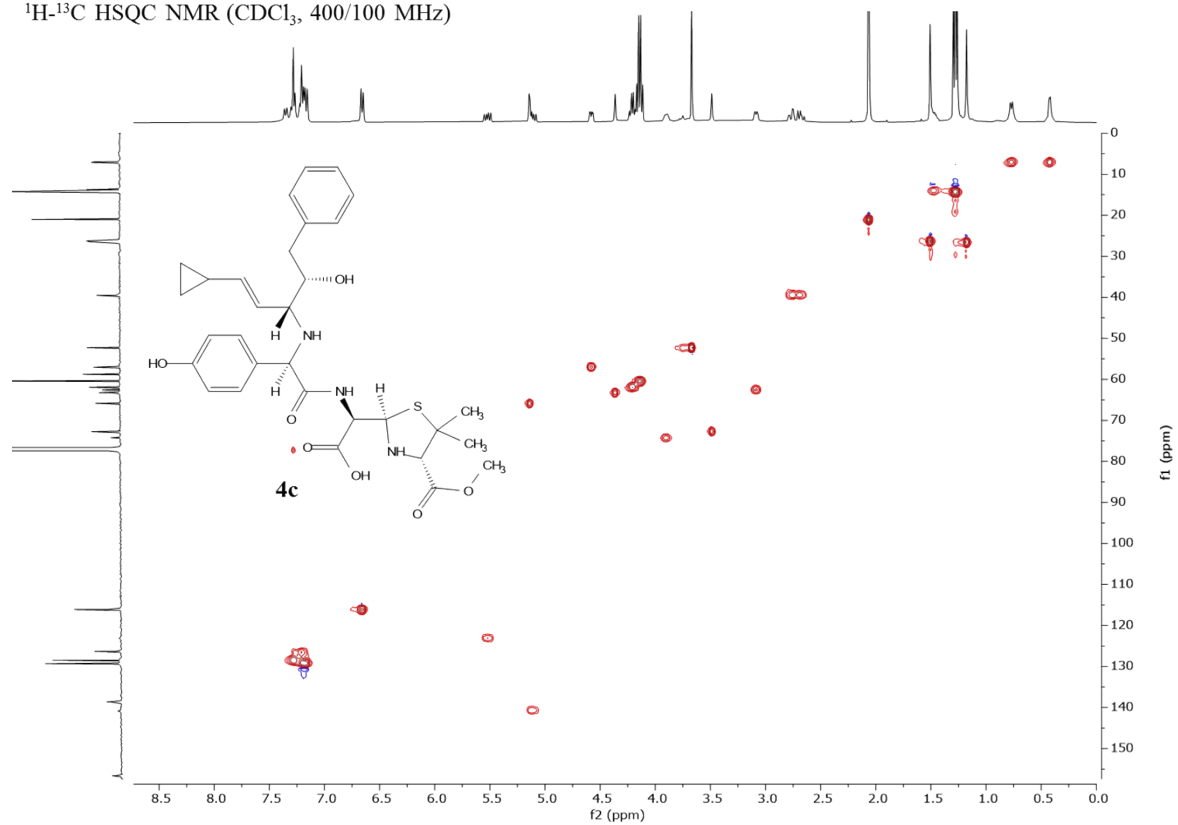

$^1\text{H}$ - $^{13}\text{C}$  HMBC NMR ( $\text{CDCl}_3$ , 400/100 MHz)

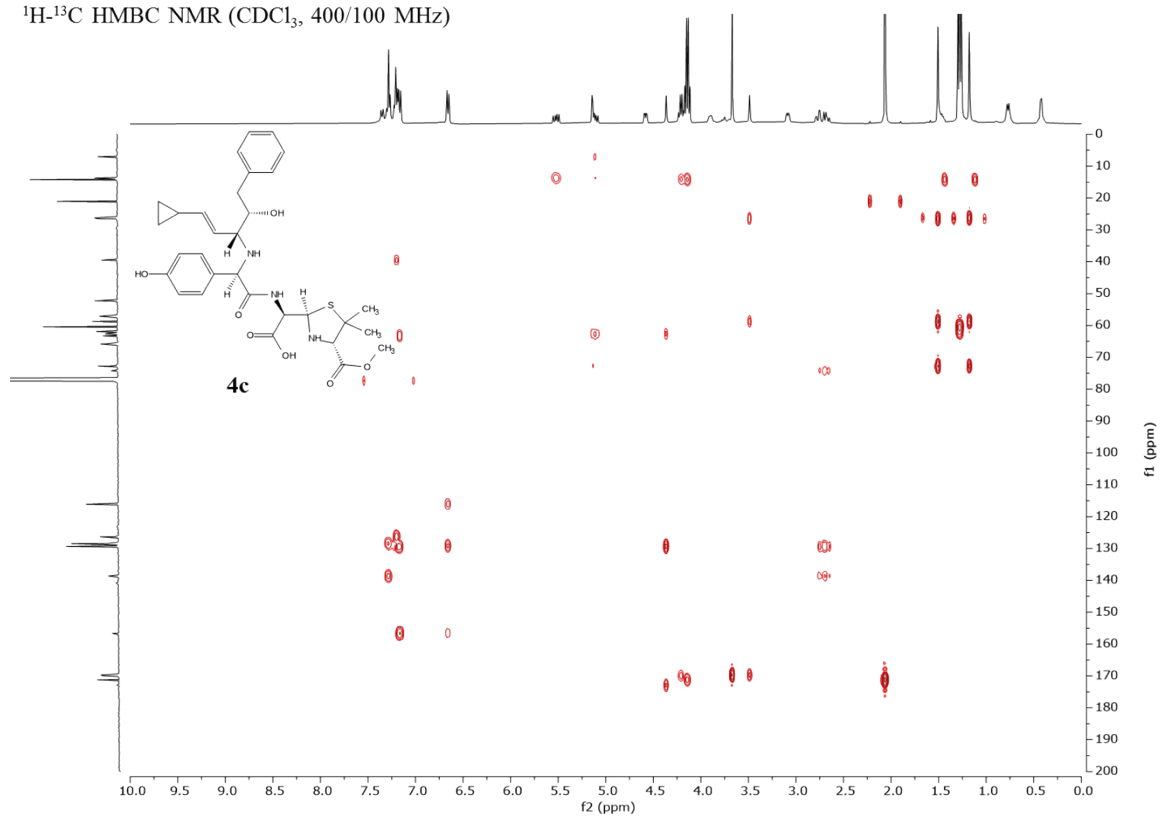

$^1\text{H}$  NMR ( $\text{CDCl}_3$ , 400 MHz)

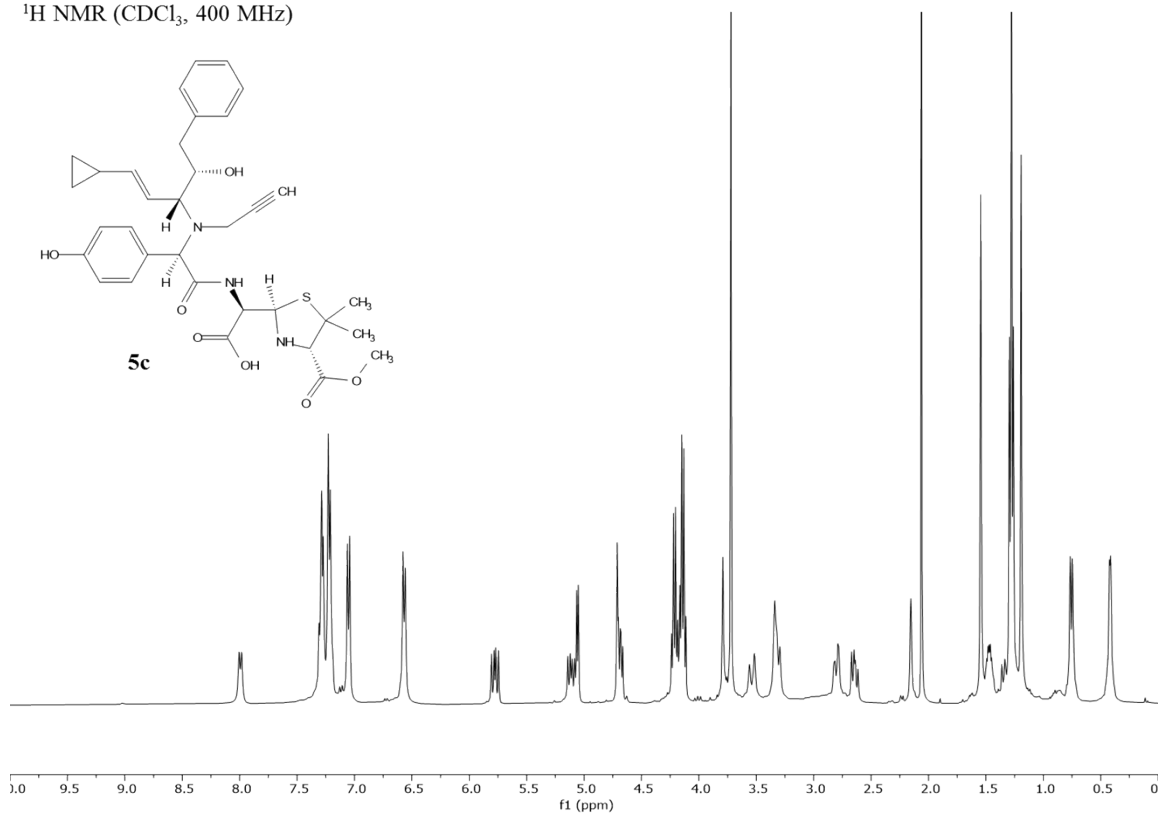

$^{13}\text{C}$  NMR ( $\text{CDCl}_3$ , 100 MHz)

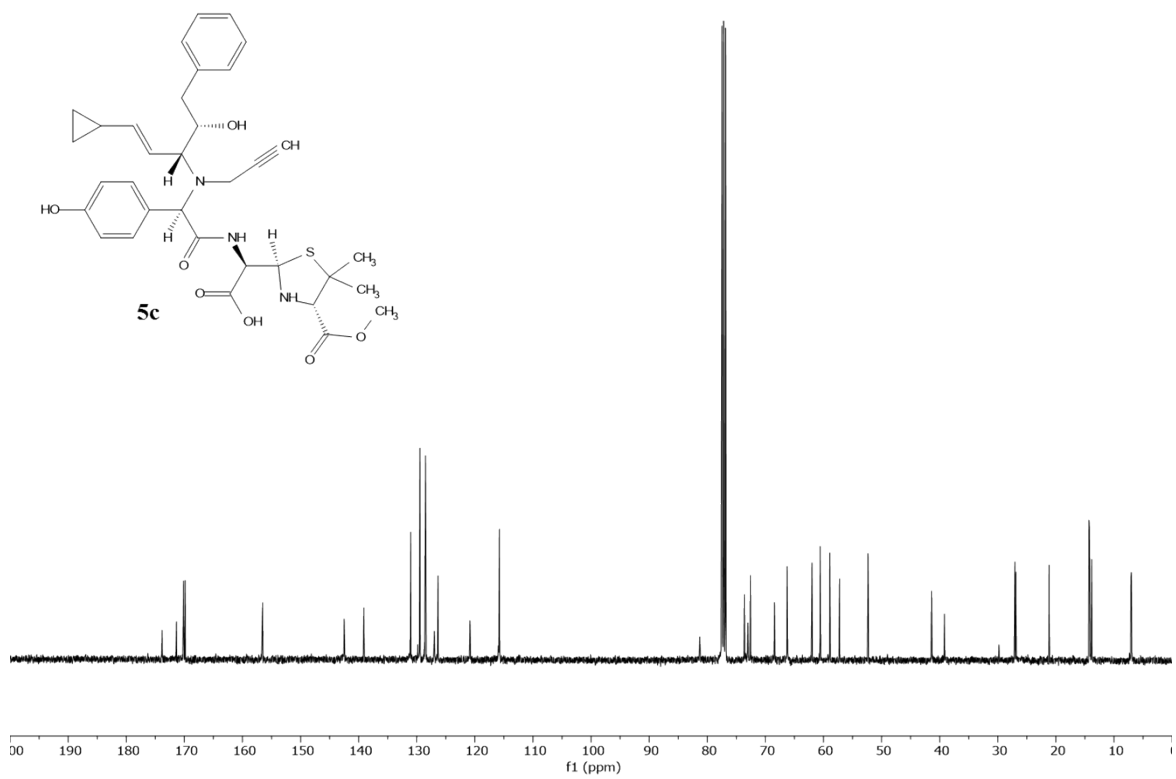

$^1\text{H}$  COSY NMR ( $\text{CDCl}_3$ , 400 MHz)

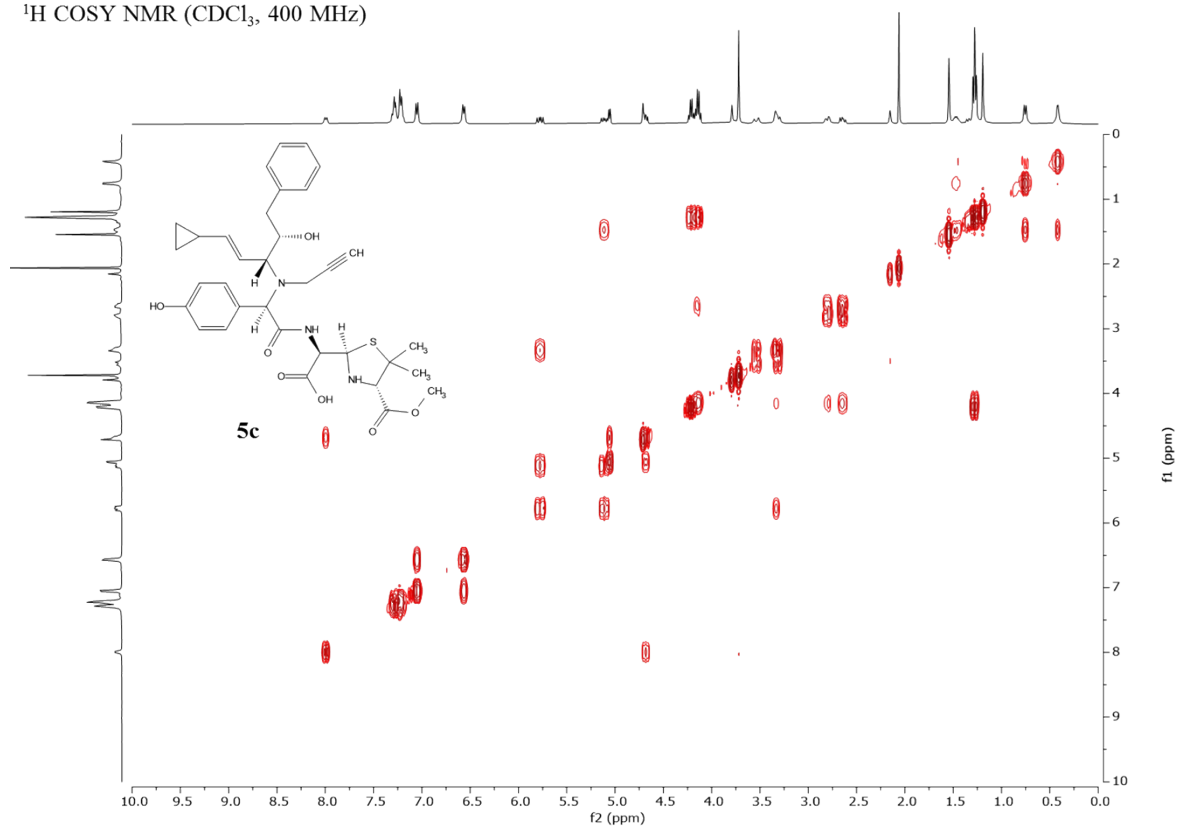

$^1\text{H}$ - $^{13}\text{C}$  HSQC NMR ( $\text{CDCl}_3$ , 400/100 MHz)

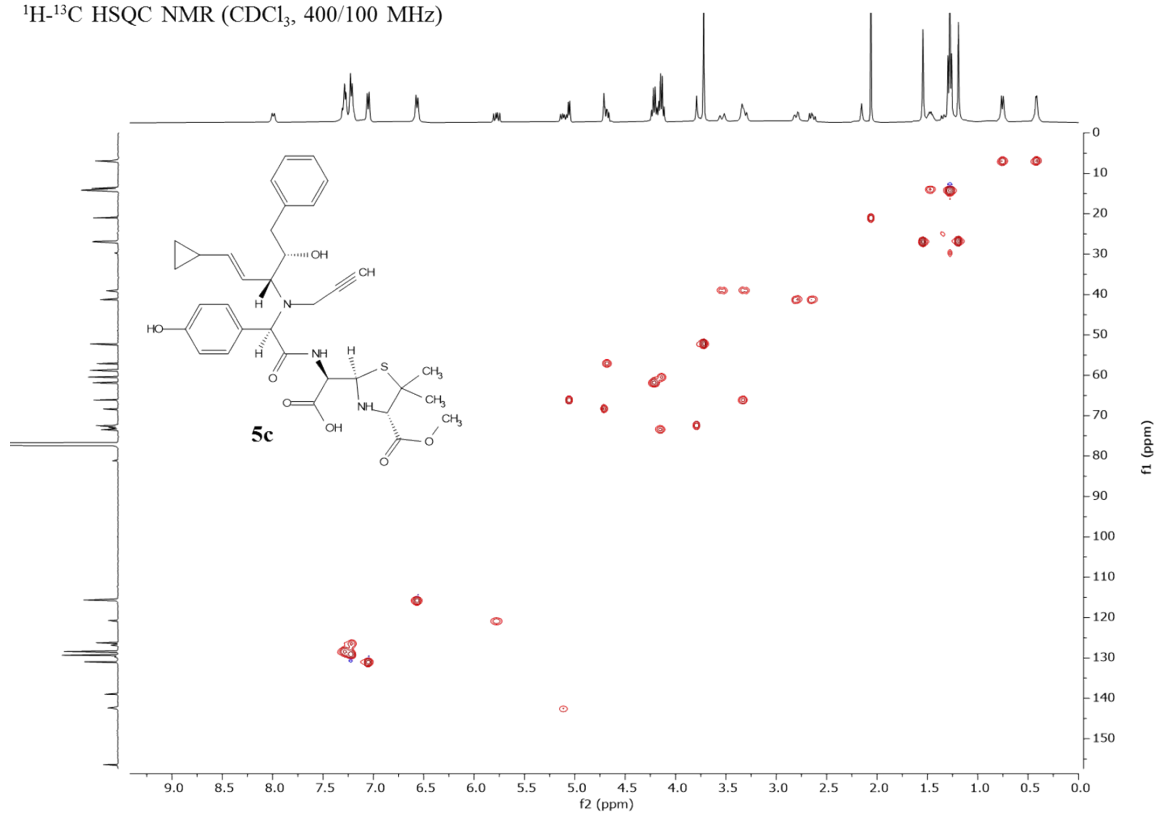

$^1\text{H}$ - $^{13}\text{C}$  HMBC NMR ( $\text{CDCl}_3$ , 400/100 MHz)

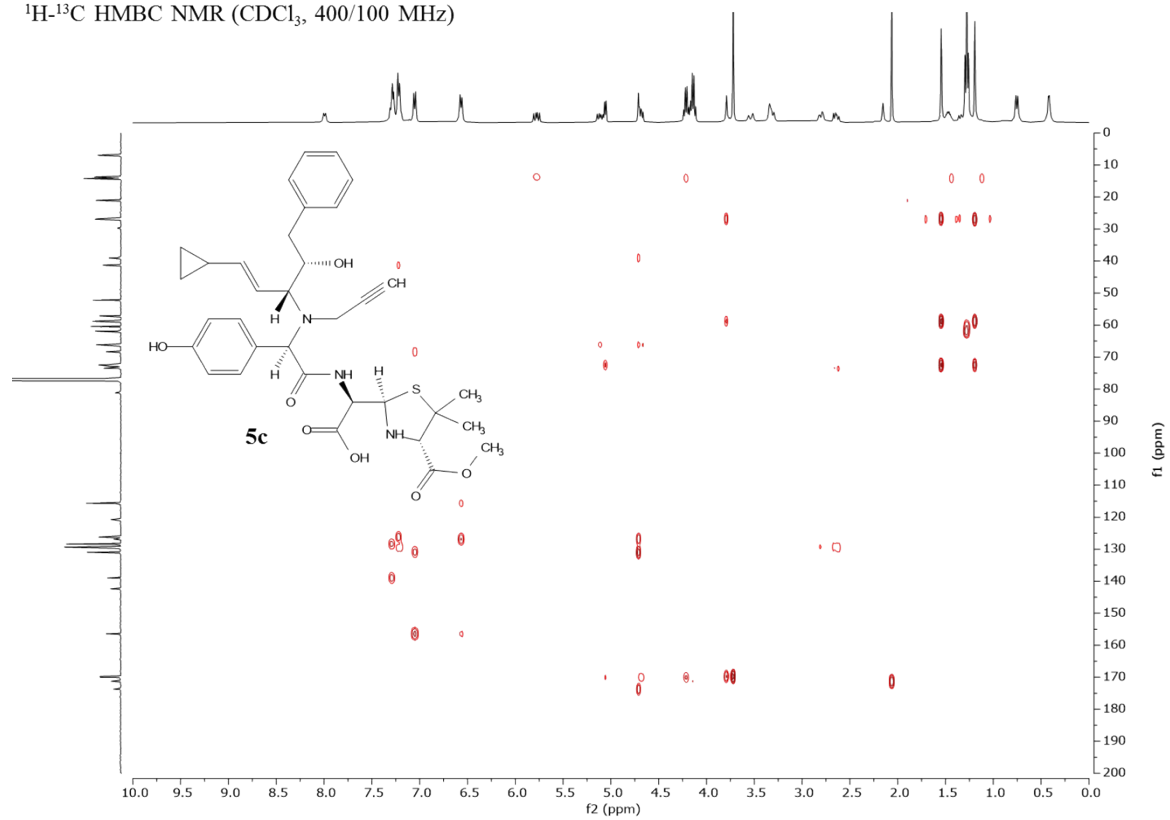

$^1\text{H}$  NMR ( $\text{CDCl}_3$ , 400 MHz)

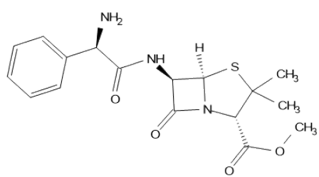

**1d**

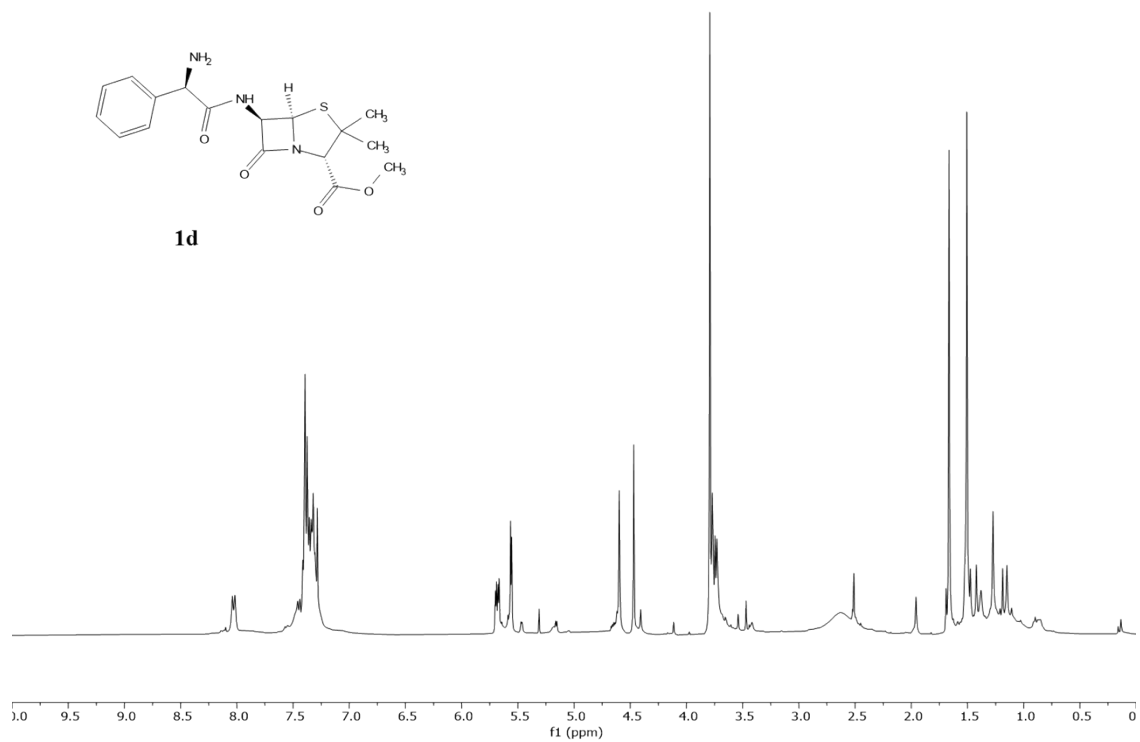

<sup>1</sup>H NMR (CDCl<sub>3</sub>, 400 MHz)

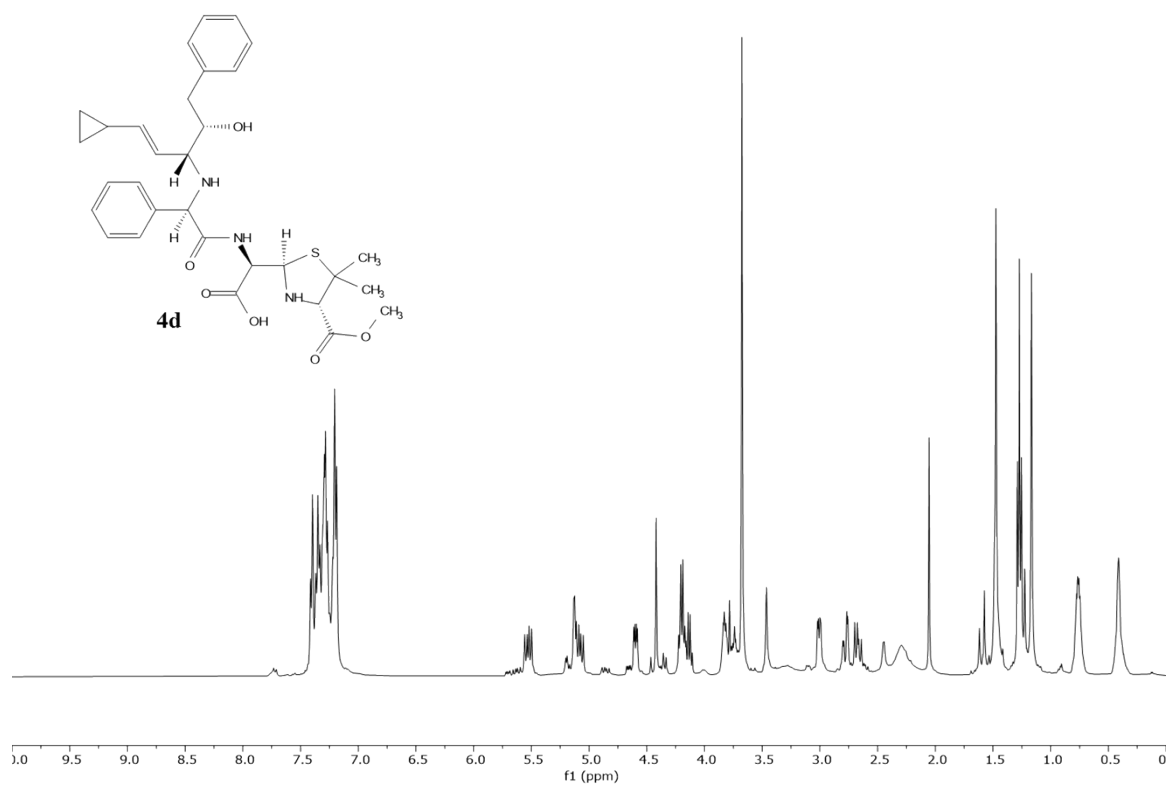

<sup>13</sup>C NMR (CDCl<sub>3</sub>, 100 MHz)

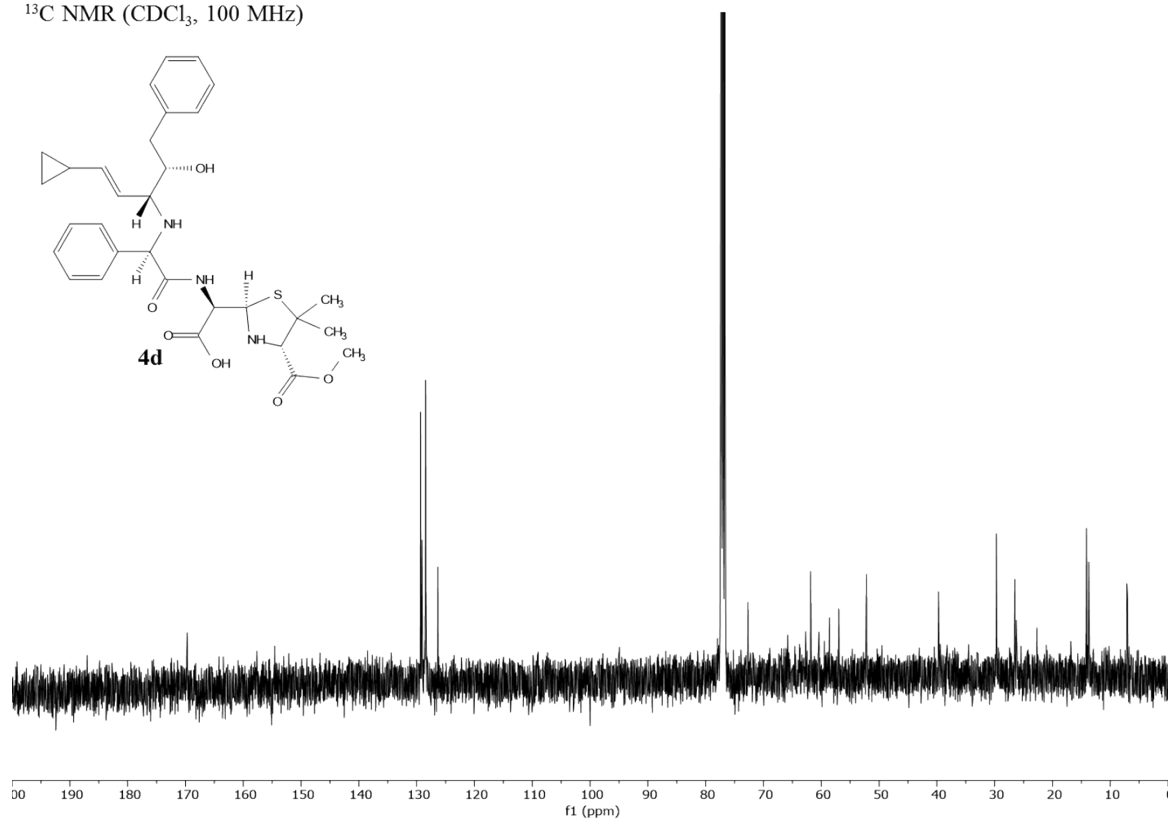



$^1\text{H}$  COSY NMR ( $\text{CDCl}_3$ , 400 MHz)

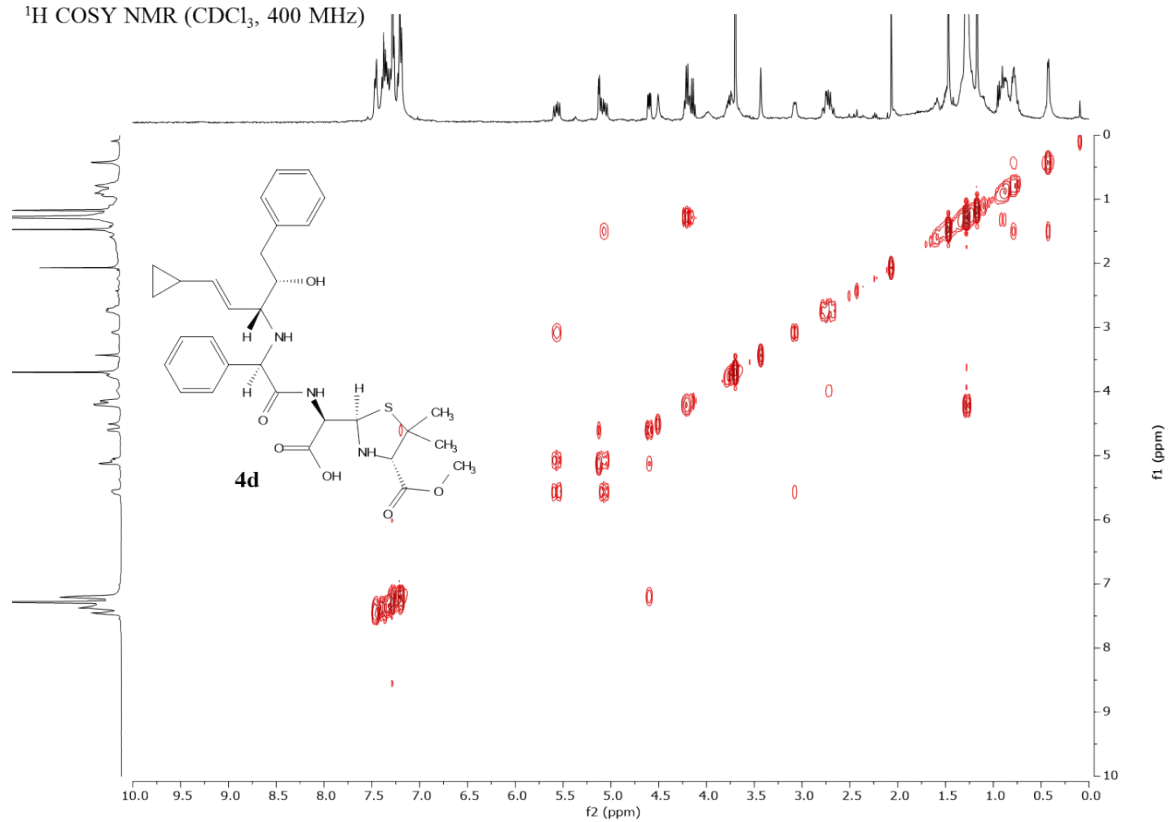

$^1\text{H}$ - $^{13}\text{C}$  HSQC NMR ( $\text{CDCl}_3$ , 400/100 MHz)

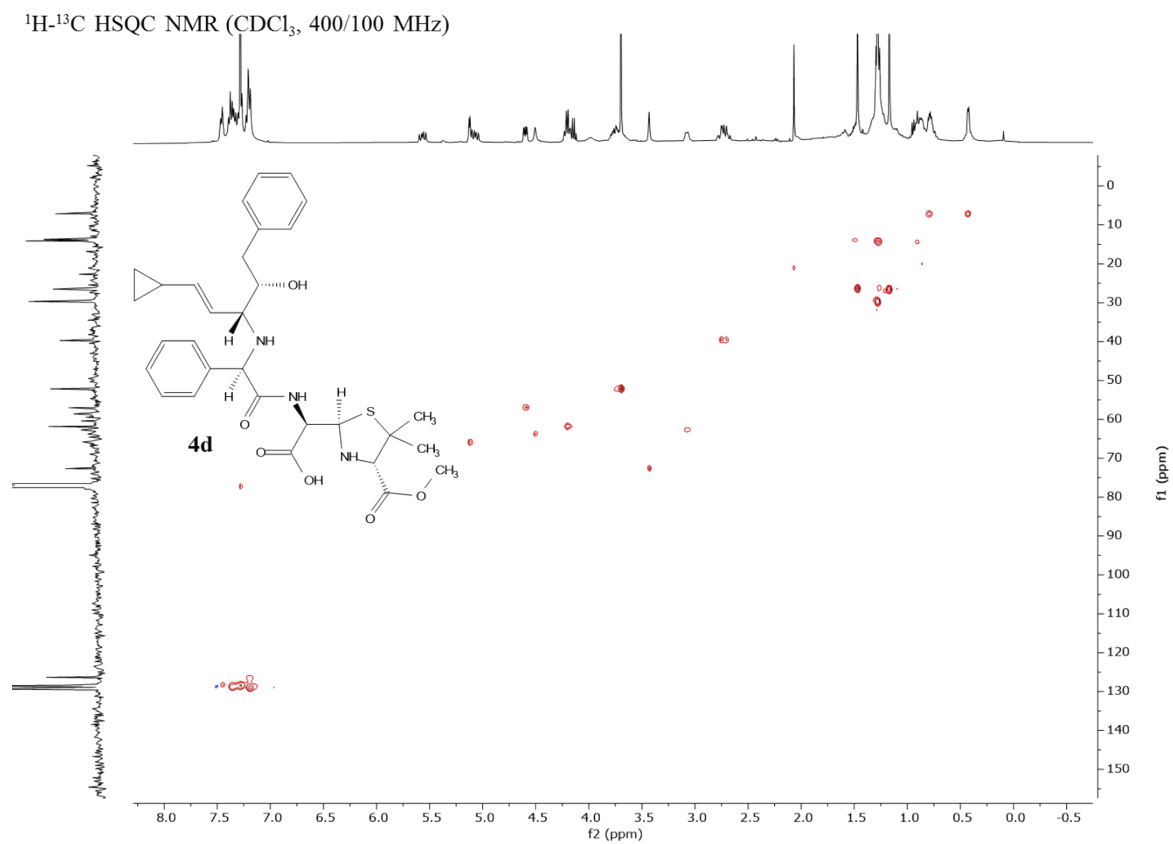

$^1\text{H}$ - $^{13}\text{C}$  HMBC NMR ( $\text{CDCl}_3$ , 400/100 MHz)

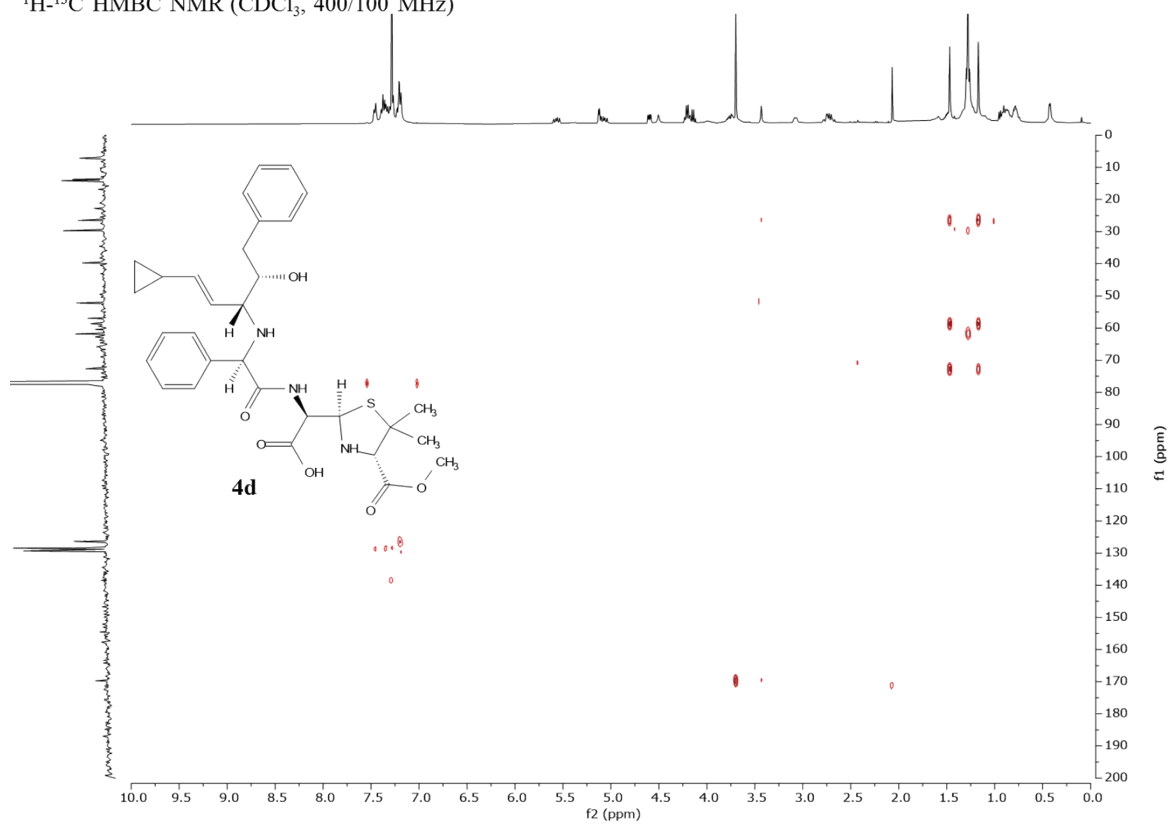

$^1\text{H}$  NMR ( $\text{CDCl}_3$ , 400 MHz)

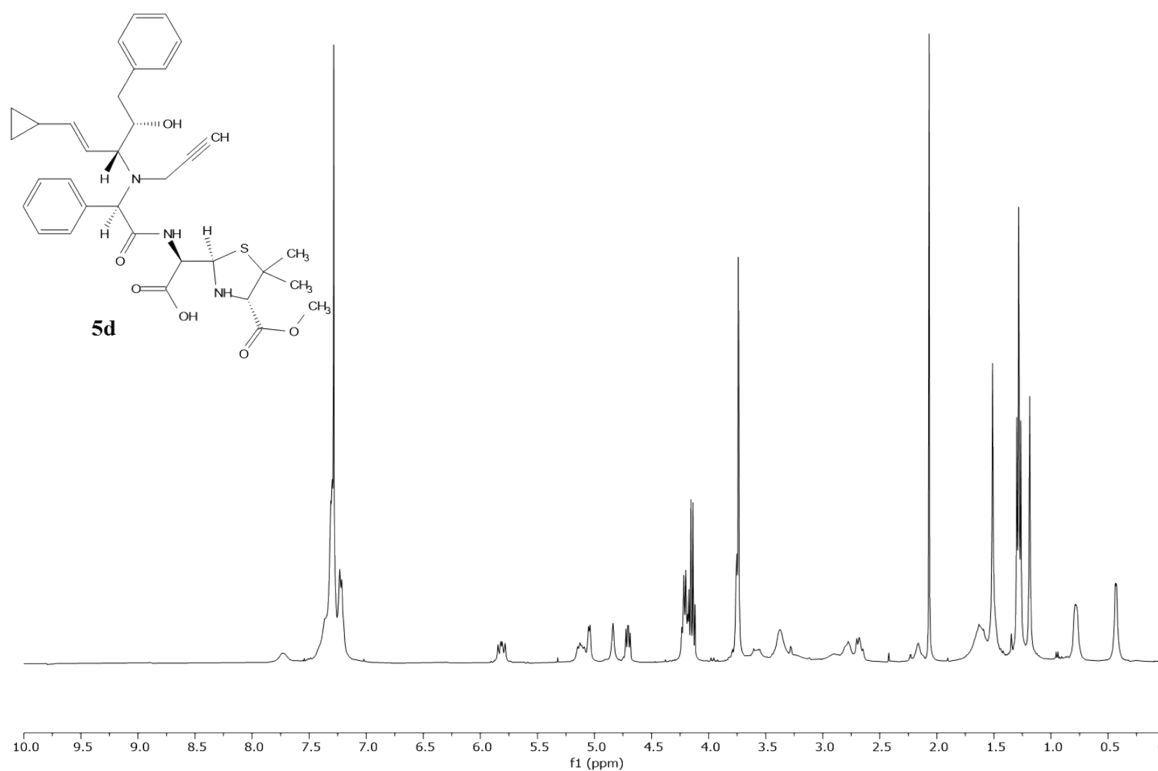

$^{13}\text{C}$  NMR ( $\text{CDCl}_3$ , 100 MHz)

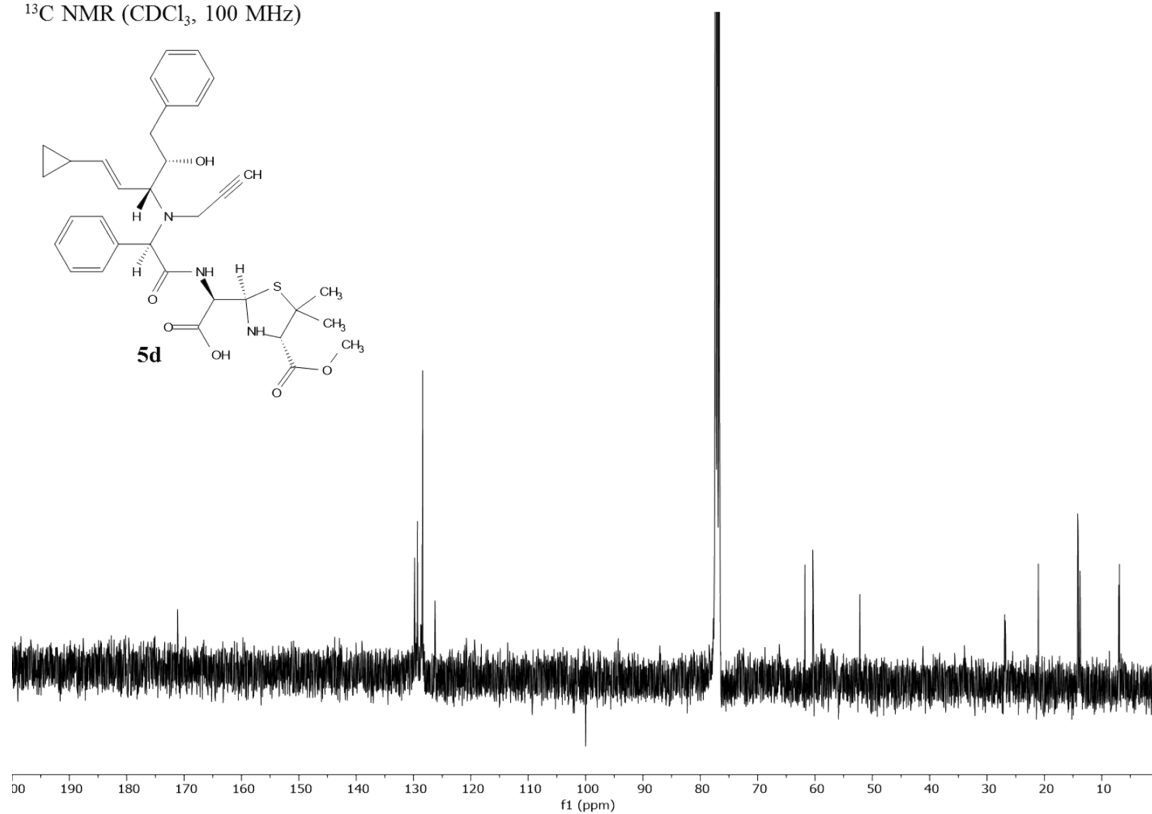

$^1\text{H}$  COSY NMR ( $\text{CDCl}_3$ , 400 MHz)

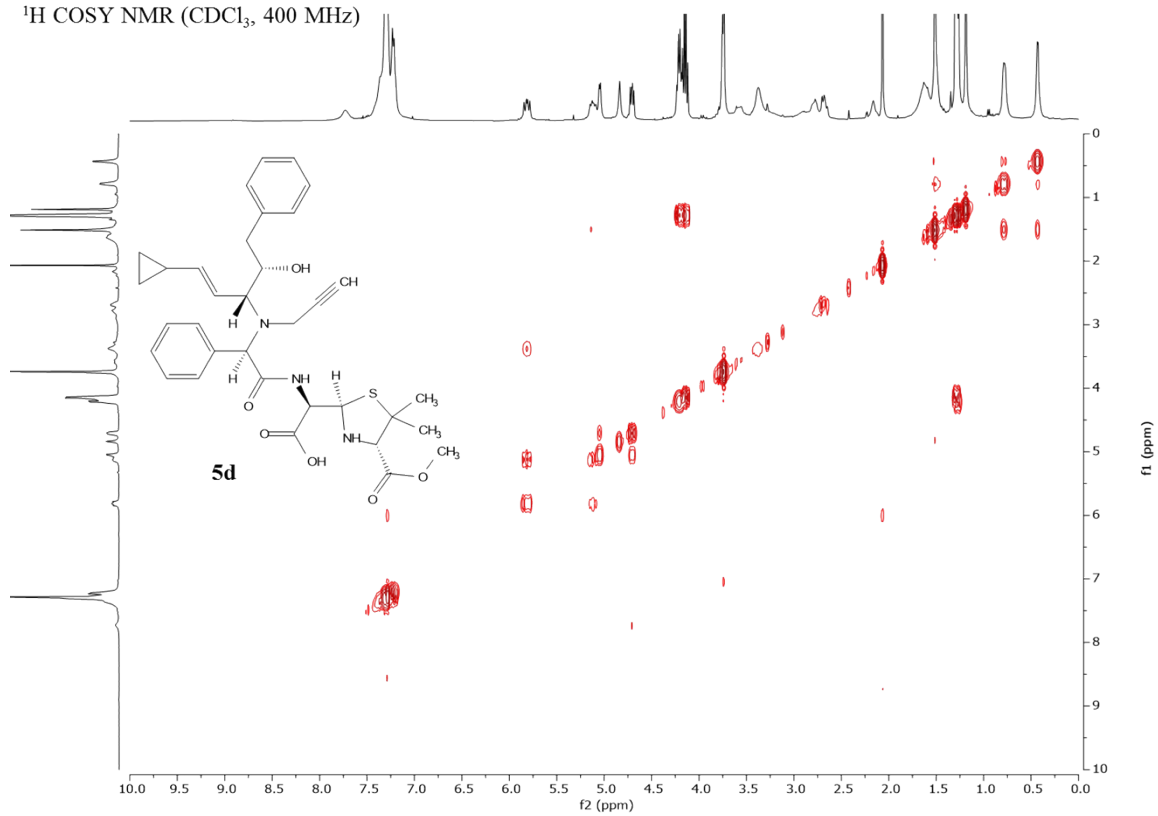

$^1\text{H}$ - $^{13}\text{C}$  HSQC NMR ( $\text{CDCl}_3$ , 400/100 MHz)

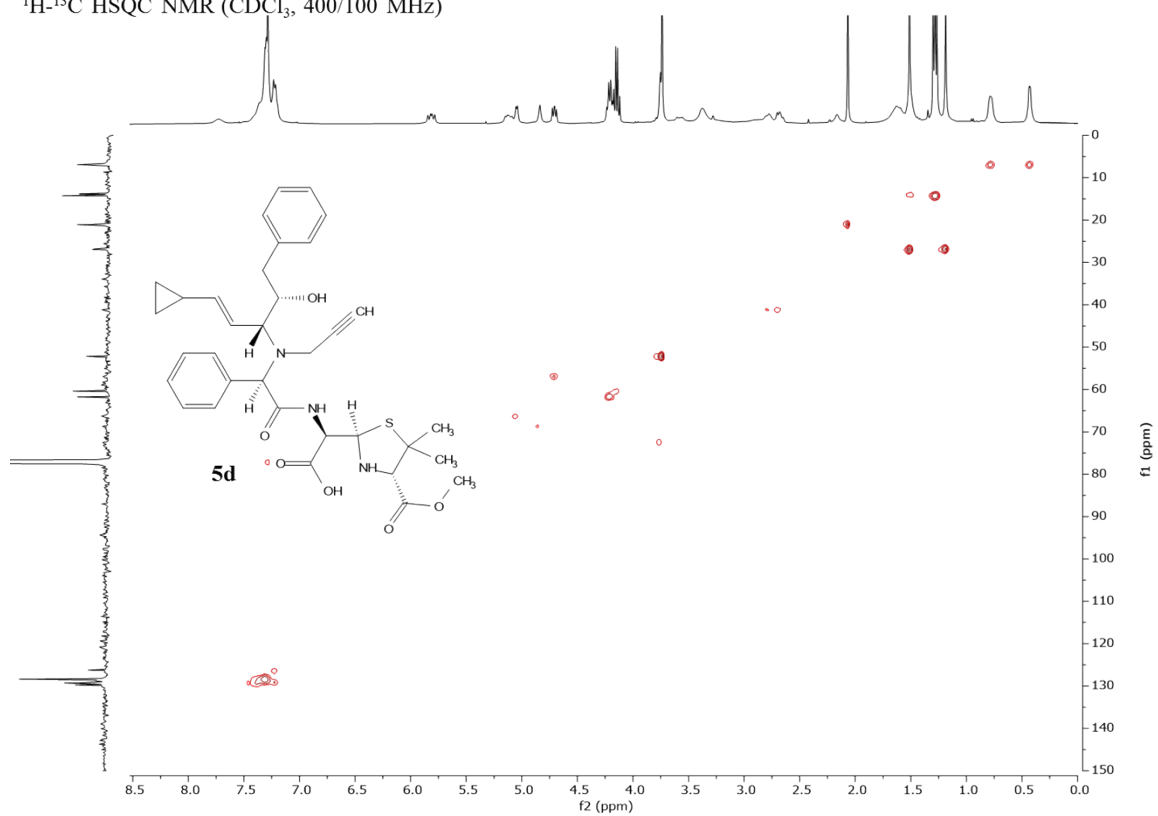

$^1\text{H}$ - $^{13}\text{C}$  HMBC NMR ( $\text{CDCl}_3$ , 400/100 MHz)

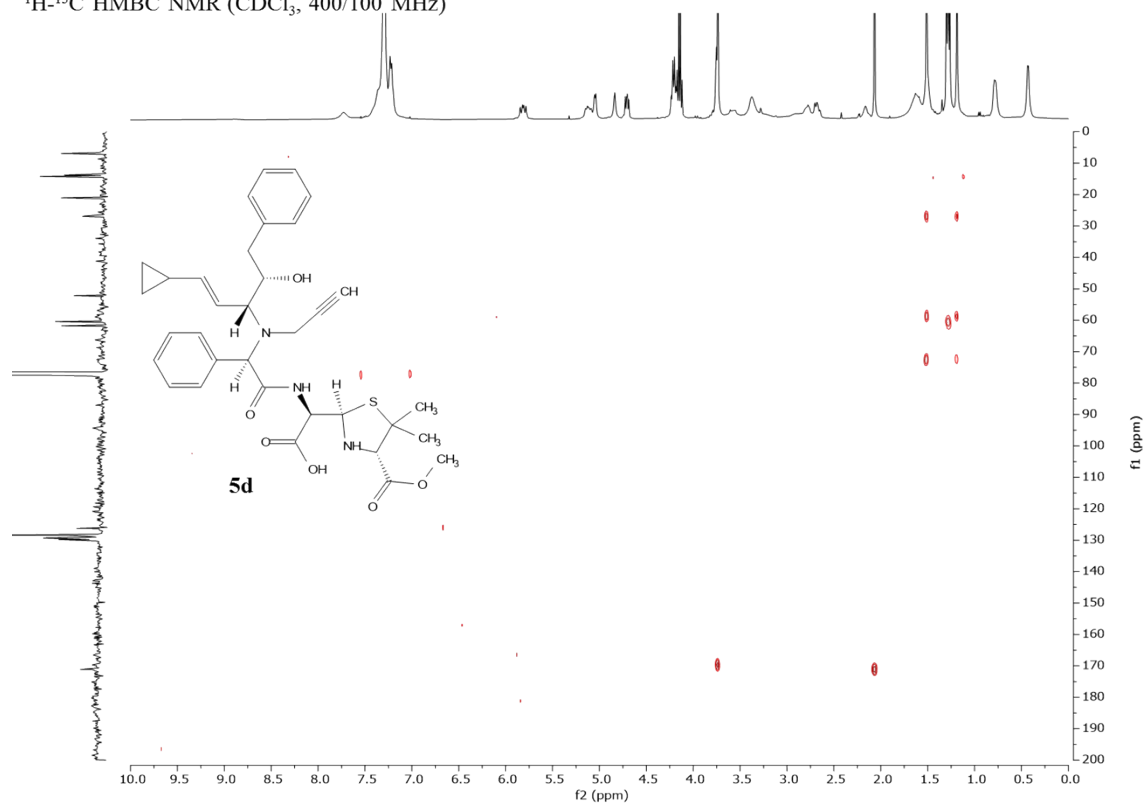

$^1\text{H}$  NMR ( $\text{CDCl}_3$ , 400 MHz)

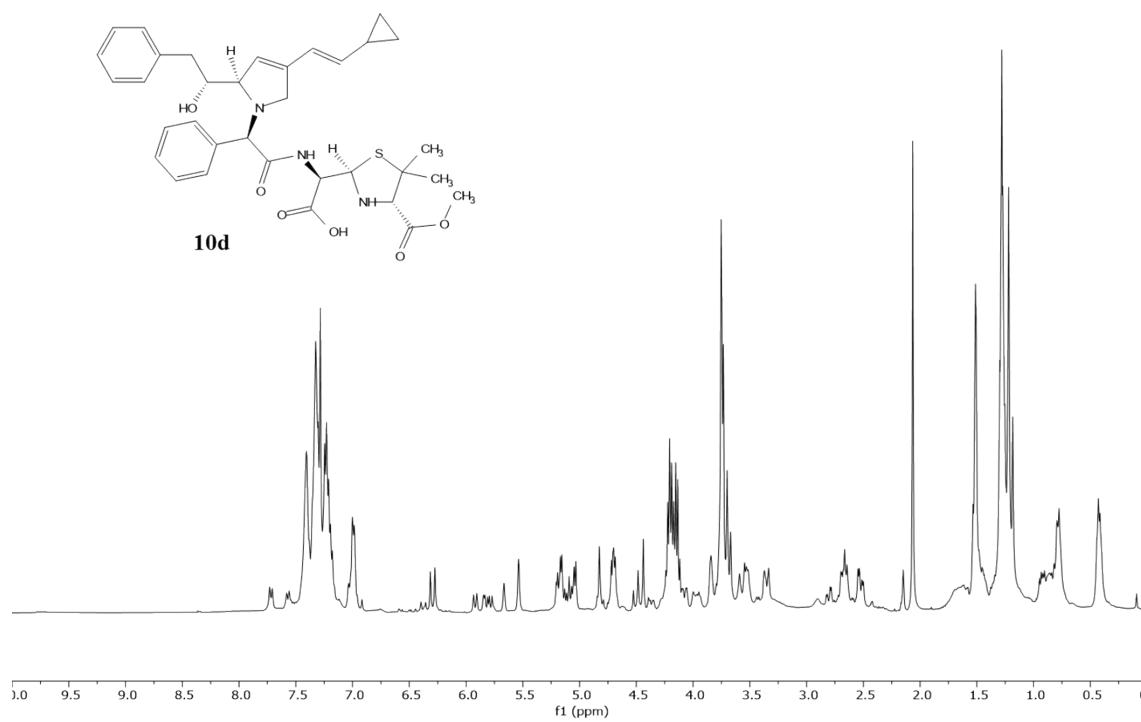

**Table S1.** Optimization conditions for the Petasis reaction

| <b>Entry</b> | <b>Solvent</b> | <b>Conditions</b>                                                                        | <b>Molarity<br/>(M)</b> | <b>Equivalents<br/>2:1a-f:3</b> | <b>Yield<br/>(%)</b> |
|--------------|----------------|------------------------------------------------------------------------------------------|-------------------------|---------------------------------|----------------------|
| <b>1</b>     | EtOH/HFIP 9:1  | 40 °C, 72 h                                                                              | 0,20                    | 1:1:1                           | 30                   |
| <b>2</b>     | EtOH/HFIP 9:1  | 0 °C, 72 h                                                                               | 0,20                    | 1:1:1                           | -                    |
| <b>3</b>     | EtOH           | rt, 72 h                                                                                 | 0,25                    | 1:1:1                           | -                    |
| <b>4</b>     | DCM            | rt, 72 h                                                                                 | 0,25                    | 1:1:1                           | -                    |
| <b>5</b>     | DCM            | rt, 24 h, 3Å molecular sieves                                                            | 0,20                    | 1:1:1                           | -                    |
| <b>6</b>     | EtOH/HFIP 9:1  | 40 °C, 72 h, 3Å molecular sieves                                                         | 0,20                    | 1:1.5:1.5                       | 53                   |
| <b>7</b>     | EtOH/HFIP 9:1  | 40 °C, 72 h, 3Å molecular sieves,<br>glycerol                                            | 0,20                    | 1:1.5:1.5                       | 23                   |
| <b>8</b>     | EtOH/HFIP 9:1  | rt, 24 h, (E)-2-<br>Cyclopropylvinylboronic acid<br>pinacol ester                        | 0,20                    | 1:1:1                           | -                    |
| <b>9</b>     | EtOH/HFIP 9:1  | 40 °C, 72 h, 3Å molecular sieves,<br>(E)-2-Cyclopropylvinylboronic acid<br>pinacol ester | 0,20                    | 1:1.5:1.5                       | 9                    |

### 3. Biological methods

#### Antigen preparation

All synthesized compounds (7.0  $\mu\text{mol}$ , 1,000 and 240 Equiv. for HSA and H1, respectively), dissolved in potassium carbonate 0.5 M, pH 11.0 in 10 % DMF, were mixed with the carrier protein (0.5 mg) and stirred overnight at room temperature. Reference antigens for PG, AMX, CFT, AZT and MRP were prepared following the major configuration. As commercially supplied from Sigma (240 Equiv), the corresponding BLC, dissolved in potassium carbonate 0.5 M, pH 11.0, was reacted with the carrier protein (2.0 mg) and stirred overnight at room temperature. Prepared antigens were purified by gel filtration chromatography on Amicon Ultra 0.5 pre-concentrated 10 K filters using PBS 1X, pH 7.4, as elution buffer. Carrier proteins used were HSA and H1.

All the synthesized haptens which lacks a beta-lactam ring (**5c**, **4d**, **5d**, and **10d**) were conjugated to the carrier proteins, following the carbodiimide chemistry as previously described<sup>[1]</sup>.

New Zealand white rabbits were immunized to raise specific IgG for PG, CFT, AZT, and MRP. To prepare the immunogenic antigens, the same protocol as for the preparation of the reference antigens was followed, but KLH (1,000 Equiv.) was used as the immunogenic protein. Immunogens were purified by size exclusion chromatography on dextran desalting columns using PBS 1X, pH 7.4, as the elution buffer.

All determinants were diluted to 1.0 mg/mL and stored at -20 °C until used. Antigen concentrations were determined by the Bradford protein assay<sup>[2]</sup>, and the protein-hapten molar ratio was established by MS-MALDI-TOF.<sup>[3]</sup>

#### Protein Digestion and LC-ESI-MS/MS Analysis

Protein digestion of HSA into smaller peptides was accomplished using trypsin and nanoscale liquid chromatography coupled to tandem mass spectrometry (nano LC-MS/MS) as the analytical technique. First, 5  $\mu\text{g}$  of the antigen in PBS 1X (5  $\mu\text{L}$ ) were taken and set to 20  $\mu\text{L}$  of 50 mM ammonium bicarbonate. Then, it was submitted to the following digestion protocol: i) 2 mM dithiothreitol in 50 mM  $\text{NH}_4\text{HCO}_3$ ,  $V_f=25 \mu\text{L}$ , 20 min (60 °C); ii) 5.5 mM iodoacetamide in 50mM  $\text{NH}_4\text{HCO}_3$ ,  $V_f=25 \mu\text{L}$ , 30 min (room temperature, darkness); iii) 10 mM dithiothreitol in 50mM  $\text{NH}_4\text{HCO}_3$ ,  $V_f=50 \mu\text{L}$ , 30 min (37 °C); and iv) 200 ng trypsin,  $V_f=52 \mu\text{L}$ , overnight (60 °C). Finally, digestion was stopped with 6  $\mu\text{L}$  10% trifluoroacetic acid. The final tryptic peptides solution was at 0.086  $\mu\text{g}/\mu\text{L}$ .

Next, 5  $\mu\text{L}$  of the digested sample was loaded onto a trap column (NanoLC Column, 3 $\mu$  C18-CL, 350  $\mu\text{m}$  x 0.5 mm; Eksigent) and desalted with 0.1% TFA at 3 $\mu\text{L}/\text{min}$  during 5 min. The peptides were then loaded onto an analytical column (LC Column, 3  $\mu$  C18-CL, 75  $\mu\text{m}$  x 12 cm, Nikkyo) equilibrated in 5% acetonitrile 0.1% formic acid. Elution was carried out with a linear gradient of 5 to 35% B in A for 30 min. (A: 0.1% formic acid; B: acetonitrile, 0.1% formic acid) at a flow rate of 300 nl/min. Peptides were analyzed in a mass spectrometer nanoESI qTOF (5600 TripleTOF, ABSCIEX). Eluted peptides were ionized applying 2.8 kV to the spray emitter, and analysis was carried out in a data-dependent mode. TOF-MS scanned for 250 ms from 350 to 1250 m/z and 25 ms from 100 to 1500 m/z on the 25 most intense 2-5 charged peaks. Dynamic exclusion was set to 15 s.



ProteinPilot v4.5 (ABSciex) default parameters were used to generate peak list directly from 5600 TripleTOF tiff files. The peak lists were saved as Mascot generic files (mgf) searched with MASCOT v 2.3.02 (Matrix Science).

Database search was performed on the Swissprot database with the taxonomy fixed to humans. Searches were done with tryptic specificity allowing two missed cleavages and tolerance on the mass measurement of 25 ppm in MS mode and 0.6 Da for MS/MS ions. Artificial modifications on peptides such as carbamidomethylation on Cys, oxidation on Met, and deamidation on Asn and Gln, were excluded to ensure reliable quantification.

### **Multiplexed Compact disc-based test protocol**

Reagents printed were (I) the prepared and reference antigens and (II) controls. HSA and rabbit IgG (or human IgE) were used as negative and positive controls of the assay. Reference antigens were used to test the specificity of each serum. Antigens were prepared in sodium carbonate/bicarbonate buffer 0.1 M, pH 9.6, and controls in PBS 1X, pH 7.4.

Reagents (25 nL, 40 µg/mL) were spotted in microarray format (20 arrays per disk of 5 × 4 spots), using a noncontact printing device (AD 1500 BioDot, Inc., Irvine, CA) on a regular DVD (Digital versatile Disc) (CD Rohling-up GmbH, Saarbrücken, Germany). After printing, the DVDs were incubated overnight at 37 °C.

To detect specific IgG against PG, CFT, MRP, and AZT, different dilutions (1/250-1/16,000) of rabbit sera and control (PBS-T) (25 µL per sample) were added to each array and incubated for 15 min. Then, the washing step consisted of washing the DVD with PBS-T and water. 25 µL of goat anti-rabbit antibody labeled with horseradish peroxidase (Abcam, Cambridge, UK) in PBS-T (dilution 1/400) was added for 15 min followed by the washing step.

The histogram depicting the ability of all antigens to elicit activity in the immunoassay is shown in Figure S2A and comprises assay data for compounds against sera raised against PG (S1) and CFT (S2).

To detect specific IgE from allergic patients and controls, 25 µL of the sample was added to each array and incubated for 30 min. Then, the DVD was washed, and 25 µL of α-human IgE monoclonal antibody (Ingenasa, Madrid, Spain) in PBS-T buffer (1 µg/mL) was added and incubated for 15 min. After washing as before, 25 µL of a 1/100 dilution of goat anti-mouse antibody labeled with horseradish peroxidase (Abcam, Cambridge, UK) was added for 15 min.

**Figure S1.** A) Histogram of the ‘activity’ of the antigens. B) Heatmaps for the cohort of the HSA- and H1-derived antigens representing the signals obtained in the immunoassays for each immunised sera (S1 and S2). 1) 6-APA, 2) 7-ACDA, 3) AMX, and 4) AMP-derived antigens.

The immunoreaction was developed by homogeneously dispensing 1.0 mL of TMB (SDT GmbH, Baesweiler, Germany) along the whole disc surface. The reaction was stopped by washing the disk with water after 8 min. A modified DVD drive read signals, and data were analyzed as previously described.<sup>[4]</sup> All experiments were repeated three times.

10 20 30 40 50  
 MKWVTFISLL FLFSSAYSRG VFRRDAHKSE VAHRFKDLGE ENFKALVLIA  
 60 70 80 90 100  
 FAQYLQQCPF EDHVKLVNEV TEFAKTCVAD ESAENC DKSL HTLFGDKLCT  
 110 120 130 140 150  
 VATLRETYGE MADCCAQKQEP ERNECF LQHK DDNP NL PRLV RPEVDVMCTA  
 160 170 180 190 200  
 FHDNEETFLK KYLYEIARRH PYFYAPEL LF FAKRYKAAFT ECCQAADKAA  
 210 220 230 240 250  
 CLLPKLDEL R DEGKASSAKQ RLK CASLQKF GERAFKAWAV ARLSQRFPKA  
 260 270 280 290 300  
 EFAEVSKLVT DLTKVHTECC HGD LLECADD RADLAKYICE NQDSISSK LK  
 310 320 330 340 350  
 ECCEKPLLEK SHCIAEVEND EMPADLPSLA ADFVESKDVC KNYAEAKDVF  
 360 370 380 390 400  
 LGMFLYEYAR RHPDYSV VLL LRLAKTYETT LEKCCAAADP HECYAKVFDE  
 410 420 430 440 450  
 FKPLVEEPQN LIKQNC ELF E QLGEYKFQNA LLVRYTKKVP QVSTPTLVEV  
 460 470 480 490 500  
 SRNLGKVGSK CCKHPEAKRM PCAEDYLSVV LNQLCVLHEK TPVSDRVTKC  
 510 520 530 540 550  
 CTESLVNRRP CFSALEVDET YVPKEFNAET FTFHADICTL SEKERQIKKQ  
 560 570 580 590 600  
 TALVELVKHK PKATKEQLKA VMDDFAAFVE KCCKADDKET CFAEEGK KLV  
  
 AASQAALGL

**Figure S2.** The amino acid sequence was obtained for HSA after protein modification with antigen **1c**.

HSA is a single chain consisting of 609 amino acids with a molecular weight of 66.5 kDa, including a signal peptide (1–18), a pro-peptide (19–24), and the active albumin (585 amino acids).<sup>[5]</sup> Both the signal peptide and pro-peptide amino acids are blue, the modified peptide is red, and the altered amino acid residue is yellow-highlighted.

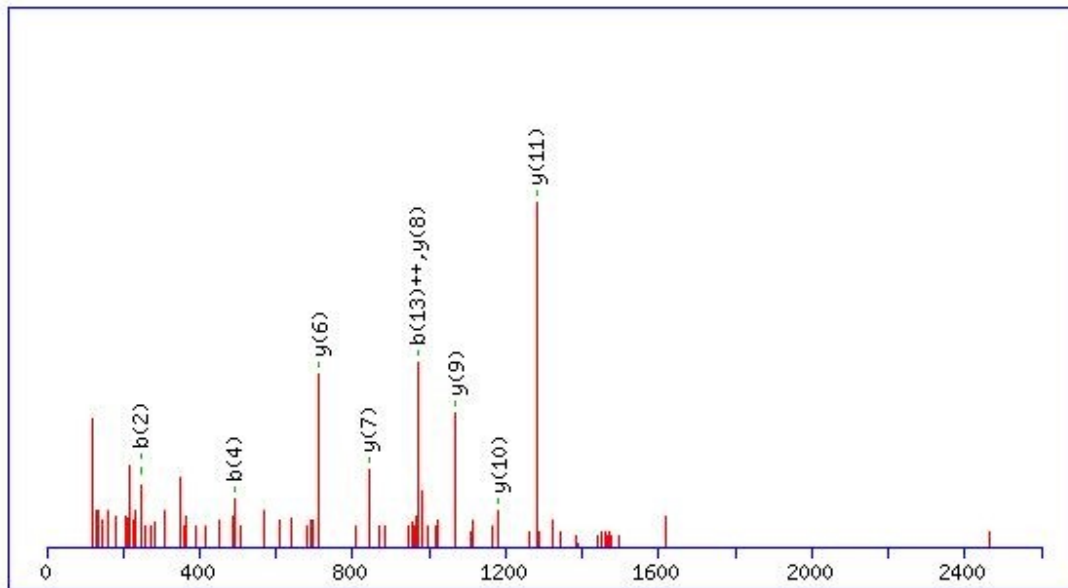

| #  | b               | b <sup>++</sup> | b <sup>*</sup> | b <sup>+++</sup> | b <sup>0</sup> | b <sup>0++</sup> | Seq. | y                | y <sup>++</sup> | y <sup>*</sup> | y <sup>+++</sup> | y <sup>0</sup> | y <sup>0++</sup> | #  |
|----|-----------------|-----------------|----------------|------------------|----------------|------------------|------|------------------|-----------------|----------------|------------------|----------------|------------------|----|
| 1  | 100.0757        | 50.5415         |                |                  |                |                  | V    |                  |                 |                |                  |                |                  | 17 |
| 2  | <b>247.1441</b> | 124.0757        |                |                  |                |                  | F    | 2326.1550        | 1163.5811       | 2309.1284      | 1155.0678        | 2308.1444      | 1154.5758        | 16 |
| 3  | 362.1710        | 181.5892        |                |                  | 344.1605       | 172.5839         | D    | 2179.0866        | 1090.0469       | 2162.0600      | 1081.5336        | 2161.0760      | 1081.0416        | 15 |
| 4  | <b>491.2136</b> | 246.1105        |                |                  | 473.2031       | 237.1052         | E    | 2064.0596        | 1032.5334       | 2047.0331      | 1024.0202        | 2046.0491      | 1023.5282        | 14 |
| 5  | 638.2821        | 319.6447        |                |                  | 620.2715       | 310.6394         | F    | 1935.0170        | 968.0121        | 1917.9905      | 959.4989         | 1917.0065      | 959.0069         | 13 |
| 6  | 1146.5050       | 573.7562        | 1129.4785      | 565.2429         | 1128.4945      | 564.7509         | K    | 1787.9486        | 894.4779        | 1770.9221      | 885.9647         | 1769.9380      | 885.4727         | 12 |
| 7  | 1243.5578       | 622.2825        | 1226.5312      | 613.7693         | 1225.5472      | 613.2773         | P    | <b>1279.7256</b> | 640.3665        | 1262.6991      | 631.8532         | 1261.7151      | 631.3612         | 11 |
| 8  | 1356.6419       | 678.8246        | 1339.6153      | 670.3113         | 1338.6313      | 669.8193         | L    | <b>1182.6729</b> | 591.8401        | 1165.6463      | 583.3268         | 1164.6623      | 582.8348         | 10 |
| 9  | 1455.7103       | 728.3588        | 1438.6837      | 719.8455         | 1437.6997      | 719.3535         | V    | <b>1069.5888</b> | 535.2980        | 1052.5623      | 526.7848         | 1051.5782      | 526.2928         | 9  |
| 10 | 1584.7529       | 792.8801        | 1567.7263      | 784.3668         | 1566.7423      | 783.8748         | E    | <b>970.5204</b>  | 485.7638        | 953.4938       | 477.2506         | 952.5098       | 476.7585         | 8  |
| 11 | 1713.7955       | 857.4014        | 1696.7689      | 848.8881         | 1695.7849      | 848.3961         | E    | <b>841.4778</b>  | 421.2425        | 824.4512       | 412.7293         | 823.4672       | 412.2373         | 7  |
| 12 | 1810.8482       | 905.9278        | 1793.8217      | 897.4145         | 1792.8377      | 896.9225         | P    | <b>712.4352</b>  | 356.7212        | 695.4087       | 348.2080         |                |                  | 6  |
| 13 | 1938.9068       | <b>969.9570</b> | 1921.8803      | 961.4438         | 1920.8962      | 960.9518         | Q    | 615.3824         | 308.1949        | 598.3559       | 299.6816         |                |                  | 5  |
| 14 | 2052.9497       | 1026.9785       | 2035.9232      | 1018.4652        | 2034.9392      | 1017.9732        | N    | 487.3239         | 244.1656        | 470.2973       | 235.6523         |                |                  | 4  |
| 15 | 2166.0338       | 1083.5205       | 2149.0072      | 1075.0073        | 2148.0232      | 1074.5153        | L    | 373.2809         | 187.1441        | 356.2544       | 178.6308         |                |                  | 3  |
| 16 | 2279.1179       | 1140.0626       | 2262.0913      | 1131.5493        | 2261.1073      | 1131.0573        | I    | 260.1969         | 130.6021        | 243.1703       | 122.0888         |                |                  | 2  |
| 17 |                 |                 |                |                  |                |                  | K    | 147.1128         | 74.0600         | 130.0863       | 65.5468          |                |                  | 1  |

**Figure S3.** Modified peptide and ESI-MS/MS spectra fragmentation pathway of (K) VFDEFKPLVEEPQNLIK(Q)

Calibrators used: 0, 0.35, 0.70, 3.50, 17.5 and 100. IU/mL. The standard data points (signal vs. semi-log concentration) were the mean of 5 curves performed on different days and different disks. A four-parameter logistic (4PL) curve was fitted through the points, using SigmaPlot 11 software. Sensitivity ( $IC_{50} = 0.92 \pm 0.03$  IU/mL), slope = 1.24,  $r^2 = 0.9998$ . The limit of quantification ( $\geq 0.06$  IU/mL) is equal to the signal of the blank plus ten times the SD (mean + 10xSD), with a relative standard deviation (RSD) ranging from 3 to 15%.

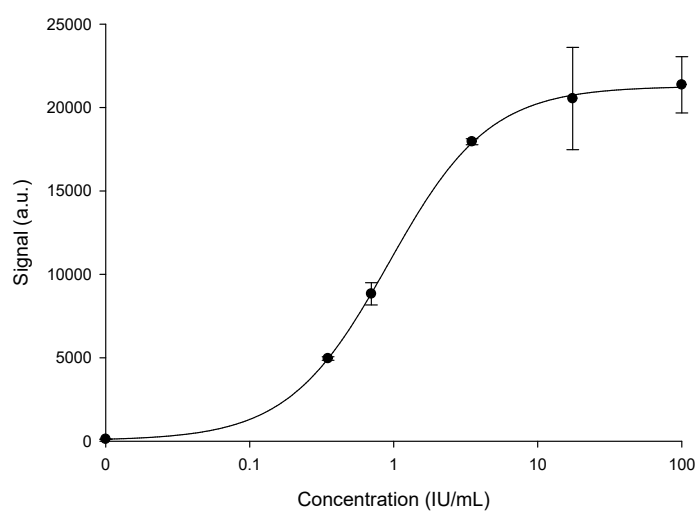

**Figure S4.** Calibration curve for IgE using IgE human serum (3<sup>rd</sup> WHO International Standard) and the capture antibody Omalizumab.

#### 4. Samples from allergic patients and controls

All samples from allergic patients and controls were provided by the Hospital Universitari i Politènic La Fe (Valencia, Spain), and informed consent for the diagnostic procedures was obtained from all patients. All participants were enrolled after giving written informed consent according to protocols approved by the ethics review board at La Fe University Hospital (registry no. COBIOPHAD). The procedures followed were in accordance with the Helsinki Declaration of 1975 as revised in 2008. The patients were diagnosed following the process described in the European Network of Drug Allergy (ENDA) protocol based on skin testing, in vitro tests, or drug provocation tests, whenever necessary.

**Table S2.** Clinical characteristics of the cohort of allergic patients

| <b>Patient Number</b> | <b>Sex<sup>[a]</sup></b> | <b>Age (years)</b> | <b>Culprit drug</b> | <b>Clinical manifestation</b> | <b>Route</b> | <b>Time</b> |
|-----------------------|--------------------------|--------------------|---------------------|-------------------------------|--------------|-------------|
| 1                     | M                        | 68                 | Augmentin           | Anaphylaxis                   | Parenteral   | Immediate   |
| 2                     | F                        | 36                 | Amoxicillin         | Anaphylaxis                   | Oral         | Immediate   |
| 3                     | F                        | 42                 | Augmentin           | Anaphylaxis                   | Oral         | Immediate   |
| 4                     | M                        | 49                 | Augmentin           | Cutaneous                     | Oral         | Delayed     |
| 5                     | M                        | 80                 | Augmentin           | Anaphylaxis                   | Parenteral   | Immediate   |
| 6                     | M                        | 44                 | Augmentin           | Cutaneous                     | Oral         | Delayed     |
| 7                     | F                        | 32                 | Augmentin           | Anaphylaxis                   | Oral         | Immediate   |
| 8                     | F                        | 47                 | Amoxicillin         | Anaphylaxis                   | Oral         | Immediate   |
| 9                     | M                        | 56                 | Augmentin           | Cutaneous                     | Oral         | Immediate   |
| 10                    | F                        | 32                 | Cefuroxime          | Cutaneous                     | Oral         | Delayed     |
| 11                    | F                        | 19                 | Unspecific          | Cutaneous                     | Manipulation | Immediate   |
| 12                    | M                        | 56                 | Amoxicillin         | Cutaneous                     | Oral         | Immediate   |

<sup>[a]</sup>Sex: F=Female, M=Male.

## 5. References

- [1] E. Peña-Mendizabal, S. Morais, A. Maquieira. *Chem. Commun.* **2020**, *56*, 11973–11976.
- [2] M. M. Bradford, *Anal. Biochem.* **1976**, *72*, 248–254.
- [3] Y. Wang, C. H. He, H. Zheng, H. Bin Zhang, *Int. J. Mol. Sci.* **2012**, *13*, 84–96.
- [4] P. Dobosz, S. Morais, E. Bonet, R. Puchades, Á. Maquieira, *Anal. Chem.* **2015**, *87*, 9817–9824.
- [5] S. Wang, S. Liu, Y. Zhang, J. He, D. H. Coy, L. Sun, *Heal. Sci. J.* **2020**, *14*, 1–8.
